# Supplementary material for: Transcriptome analysis of Nicotiana benthamiana infected by Tobacco curly shoot virus
Source: Virol J. 2018 Sep 3;15:138. doi: 10.1186/s12985-018-1044-1 (PMC6122796; doi:10.1186/s12985-018-1044-1)
Supplement: Supplementary file 3 — Table S3. List of DEGs between Y35A vs CK. (XLS 629 kb) [file 12985_2018_1044_MOESM3_ESM.xls]

## Sheet: Y35AvsCK_35.DEG
Gene_id	readcount_Y35A	readcount_CK_35	log2FoldChange	pval	padj	Blast swiss prot
Niben101Ctg03218g00004	205.919	310.447	-0.59227	0.0011587	0.022151	sp|P31541|CLPAA_SOLLC ATP-dependent Clp protease ATP-binding subunit clpA homolog CD4A, chloroplastic OS=Solanum lycopersicum GN=CD4A PE=3 SV=1//7.2801e-68
Niben101Ctg05484g00004	58.4763	30.0385	0.96104	0.001593	0.027933	-//-
Niben101Ctg07284g00001	44.0258	13.1004	1.7487	5.8307e-06	0.00033962	-//-
Niben101Ctg09466g00002	154.595	246.145	-0.67101	0.0004926	0.011486	-//-
Niben101Ctg10591g00003	161.284	289.159	-0.84226	0.00016256	0.0050001	-//-
Niben101Ctg10609g00004	95.497	237.043	-1.3116	3.2625e-09	5.6136e-07	-//-
Niben101Ctg11483g00004	71.7812	20.5928	1.8015	0.00021178	0.0061398	-//-
Niben101Ctg12381g00001	253.876	169.181	0.58555	0.0018829	0.031527	-//-
Niben101Ctg12626g00002	129.17	56.4047	1.1954	2.8951e-05	0.0012489	-//-
Niben101Ctg13380g00001	588.769	261.249	1.1723	1.3353e-06	0.00010285	-//-
Niben101Ctg13560g00003	1.13577	15.5414	-3.7744	2.9855e-06	0.00019601	-//-
Niben101Ctg13703g00001	139.681	316.728	-1.1811	2.059e-10	4.8667e-08	-//-
Niben101Ctg13736g00004	13.3682	0	Inf	2.9356e-06	0.00019358	-//-
Niben101Ctg14522g00003	378.339	238.588	0.66516	0.00023418	0.0066185	-//-
Niben101Ctg14644g00001	39.5243	3.79295	3.3813	5.8901e-06	0.00034175	-//-
Niben101Ctg14991g00002	324.838	563.312	-0.79421	2.22e-06	0.00015481	sp|O05235|YUGF_BACSU Uncharacterized hydrolase YugF OS=Bacillus subtilis (strain 168) GN=yugF PE=3 SV=1//8.7025e-21
Niben101Ctg15093g00004	453.365	686.583	-0.59876	0.00071756	0.015367	-//-
Niben101Ctg15143g00004	49.29	10.8185	2.1878	2.6951e-08	3.5082e-06	-//-
Niben101Ctg15178g00002	319.102	217.689	0.55175	0.0016921	0.029296	-//-
Niben101Ctg15207g00002	146.839	302.713	-1.0437	1.5948e-08	2.2243e-06	-//-
Niben101Ctg15295g00003	355.538	248.498	0.51677	0.0033864	0.048217	-//-
Niben101Ctg15394g00005	209.082	332.033	-0.66726	0.00019616	0.0057885	-//-
Niben101Ctg15403g00003	219.16	320.443	-0.54809	0.0019603	0.032461	-//-
Niben101Ctg15473g00004	9.00939	0.731053	3.6234	0.0011795	0.022387	-//-
Niben101Ctg15489g00001	50.273	22.9056	1.1341	0.00085034	0.017503	-//-
Niben101Ctg15836g00002	161.269	82.8995	0.96004	0.00063713	0.014076	sp|Q9FMK7|BT1_ARATH BTB/POZ and TAZ domain-containing protein 1 OS=Arabidopsis thaliana GN=BT1 PE=1 SV=1//5.26603e-126
Niben101Ctg15895g00001	0.25193	7.90597	-4.9718	0.00038034	0.0094471	-//-
Niben101Ctg16161g00004	97.9385	48.1138	1.0254	6.14e-05	0.0022959	-//-
Niben101Ctg16210g00009	440.814	642.721	-0.54402	0.00084817	0.01748	-//-
Niben101Ctg16232g00003	43.4154	18.7223	1.2134	0.00084735	0.017471	-//-
Niben101Ctg16278g00003	146.103	90.2355	0.69522	0.0022456	0.035939	-//-
Niben101Ctg16374g00003	26459.7	40675.6	-0.62036	0.00076118	0.016109	sp|P27496|CB25_TOBAC Chlorophyll a-b binding protein 50, chloroplastic OS=Nicotiana tabacum GN=CAB50 PE=2 SV=1//0
Niben101Scf00005g01008	101.425	52.3735	0.9535	0.00012594	0.0041133	sp|Q6NRY2|NOL6_XENLA Nucleolar protein 6 OS=Xenopus laevis GN=nol6 PE=2 SV=2//8.74287e-104
Niben101Scf00011g00004	220.231	337.088	-0.61411	0.00063769	0.014076	-//-
Niben101Scf00015g01003	627.086	389.913	0.68551	3.8761e-05	0.0015841	sp|Q9FDZ9|RL212_ARATH 60S ribosomal protein L21-2 OS=Arabidopsis thaliana GN=RPL21E PE=2 SV=1//2.04356e-89
Niben101Scf00018g02003	2350.35	3254.46	-0.46955	0.0016522	0.028744	-//-
Niben101Scf00021g01007	55.4883	13.4508	2.0445	0.0011364	0.021771	sp|Q9SAK5|APL_ARATH Myb family transcription factor APL OS=Arabidopsis thaliana GN=APL PE=2 SV=2//1.51495e-12
Niben101Scf00022g09004	217.1	382.106	-0.81561	5.1482e-06	0.00030662	-//-
Niben101Scf00028g03009	2.11588	29.9896	-3.8251	4.2153e-11	1.2409e-08	-//-
Niben101Scf00032g01006	171.004	265.163	-0.63285	0.00072338	0.015469	-//-
Niben101Scf00046g02008	62.9313	13.9719	2.1713	0.0001778	0.0053562	sp|Q6NQK2|NAC8_ARATH NAC domain-containing protein 8 OS=Arabidopsis thaliana GN=NAC008 PE=2 SV=1//5.32916e-79
Niben101Scf00046g06006	197.252	329.127	-0.7386	3.1533e-05	0.0013423	sp|Q9SNB7|PP264_ARATH Pentatricopeptide repeat-containing protein At3g46610 OS=Arabidopsis thaliana GN=At3g46610 PE=2 SV=1//0
Niben101Scf00047g03022	55.1655	17.0035	1.6979	0.00032513	0.0083896	-//-
Niben101Scf00050g03002	134.527	202.167	-0.58765	0.0026436	0.04056	-//-
Niben101Scf00051g01009	120.397	585.994	-2.2831	9.4176e-09	1.4288e-06	-//-
Niben101Scf00052g09016	62.6221	123.655	-0.98158	0.001134	0.021745	-//-
Niben101Scf00058g02009	4.89028	31.2432	-2.6756	8.8933e-08	1.0111e-05	-//-
Niben101Scf00058g03014	87.9601	145.591	-0.727	0.00079851	0.016718	-//-
Niben101Scf00063g01019	169.709	269.651	-0.66803	0.00034356	0.0087216	sp|Q8GZ38|UNE10_ARATH Transcription factor UNE10 OS=Arabidopsis thaliana GN=UNE10 PE=2 SV=1//1.15885e-30
Niben101Scf00063g03007	874.357	591.51	0.56382	0.00043561	0.010428	sp|P69040|IF5A1_TOBAC Eukaryotic translation initiation factor 5A-1 OS=Nicotiana tabacum GN=EIF-5A1 PE=3 SV=1//4.57484e-109
Niben101Scf00063g04015	234.588	363.169	-0.63051	0.00035097	0.0088658	-//-
Niben101Scf00063g11003	474.306	663.989	-0.48534	0.0032338	0.046991	-//-
Niben101Scf00063g13014	7046.5	13099.8	-0.89456	1.6084e-06	0.00012058	sp|Q9ZS34|CHLP_TOBAC Geranylgeranyl diphosphate reductase, chloroplastic OS=Nicotiana tabacum GN=CHLP PE=2 SV=1//0
Niben101Scf00069g00001	123.421	230.082	-0.89856	4.2014e-06	0.00026169	-//-
Niben101Scf00069g02007	137.618	82.0968	0.74527	0.00091322	0.01844	-//-
Niben101Scf00069g03003	115.198	192.918	-0.74387	0.00043052	0.010344	-//-
Niben101Scf00069g12017	1445.82	2257.54	-0.64286	1.5724e-05	0.00075282	-//-
Niben101Scf00073g00008	119.304	231.701	-0.95762	1.2237e-06	9.5573e-05	-//-
Niben101Scf00073g04006	13.8413	37.937	-1.4546	0.0001695	0.0051607	-//-
Niben101Scf00077g05015	176.863	286.58	-0.69631	0.00016167	0.0049797	-//-
Niben101Scf00078g02001	577.568	336.876	0.77777	3.788e-06	0.00023993	-//-
Niben101Scf00078g02005	620.849	331.314	0.90604	7.4288e-08	8.5982e-06	-//-
Niben101Scf00078g02007	425.827	712.821	-0.74327	5.9135e-05	0.0022306	sp|Q9LX31|GUN4C_ARATH Tetrapyrrole-binding protein, chloroplastic OS=Arabidopsis thaliana GN=GUN4 PE=1 SV=1//4.94434e-70
Niben101Scf00080g01007	8.84349	23.4707	-1.4082	0.0022706	0.036211	-//-
Niben101Scf00080g02007	4.60857	23.7254	-2.364	1.2634e-05	0.00063321	-//-
Niben101Scf00082g05001	32.4006	2.61583	3.6307	4.1109e-08	5.003e-06	sp|O23421|GRXS3_ARATH Monothiol glutaredoxin-S3 OS=Arabidopsis thaliana GN=GRXS3 PE=3 SV=1//1.64862e-49
Niben101Scf00083g02013	43.6982	234.835	-2.426	3.8269e-28	1.4322e-24	-//-
Niben101Scf00085g01007	808.747	499.505	0.69519	2.1891e-05	0.00099602	sp|P41099|RLA2_PARAR 60S acidic ribosomal protein P2 OS=Parthenium argentatum PE=3 SV=1//2.35291e-23
Niben101Scf00089g02001	448.953	623.623	-0.47411	0.0034093	0.048497	-//-
Niben101Scf00089g02006	173.353	79.642	1.1221	2.1057e-07	2.1202e-05	-//-
Niben101Scf00089g04004	63.0042	16.5127	1.9319	3.1394e-06	0.00020432	-//-
Niben101Scf00090g04014	81.5739	13.1796	2.6298	6.6904e-06	0.00037984	-//-
Niben101Scf00090g07001	83.6926	154.495	-0.88439	5.4074e-05	0.0020773	-//-
Niben101Scf00090g08013	42.353	83.5142	-0.97956	0.00099967	0.019803	-//-
Niben101Scf00096g01009	66.467	34.9969	0.92541	0.0022359	0.035834	-//-
Niben101Scf00104g02012	1983.93	2653.74	-0.41967	0.0031541	0.046173	-//-
Niben101Scf00104g02013	108.936	59.7548	0.86636	0.0010862	0.021066	-//-
Niben101Scf00104g03001	202.17	111.874	0.8537	4.3528e-05	0.001736	sp|Q8H7Y8|H2AV1_ORYSJ Probable histone H2A variant 1 OS=Oryza sativa subsp. japonica GN=Os03g0162200 PE=2 SV=1//1.75672e-66
Niben101Scf00104g04002	624.808	1326.87	-1.0865	3.4948e-12	1.2261e-09	-//-
Niben101Scf00107g02002	33.0745	81.0153	-1.2925	3.8537e-06	0.0002434	sp|Q9FGQ7|CCD32_ARATH Cyclin-D3-2 OS=Arabidopsis thaliana GN=CYCD3-2 PE=2 SV=1//3.48428e-106
Niben101Scf00108g01009	199.018	313.435	-0.65526	0.00034087	0.0086638	sp|Q5HZ36|GAT21_ARATH GATA transcription factor 21 OS=Arabidopsis thaliana GN=GATA21 PE=1 SV=2//2.99639e-13
Niben101Scf00109g02002	123.007	57.0682	1.108	4.3165e-06	0.00026701	-//-
Niben101Scf00109g03002	198.585	321.771	-0.69628	0.00011757	0.0038852	-//-
Niben101Scf00109g07004	351.463	517.588	-0.55843	0.00092633	0.018613	-//-
Niben101Scf00109g09011	109.005	174.532	-0.67909	0.00096429	0.019221	-//-
Niben101Scf00109g10003	262.059	98.9785	1.4047	5.5277e-07	4.9352e-05	-//-
Niben101Scf00109g10005	366.883	246.844	0.57172	0.0012839	0.023856	sp|Q9C7F5|NTF2_ARATH Nuclear transport factor 2 OS=Arabidopsis thaliana GN=NTF2 PE=1 SV=1//2.63628e-70
Niben101Scf00110g01011	530.957	289.748	0.87379	3.1254e-07	3.0119e-05	-//-
Niben101Scf00110g03002	846.276	1689.72	-0.99758	4.2279e-11	1.2409e-08	-//-
Niben101Scf00111g03006	298.929	203.274	0.55638	0.0022993	0.036526	sp|Q6V9I6|HDT1_SOLCH Histone deacetylase HDT1 OS=Solanum chacoense GN=HDT1 PE=2 SV=1//1.51007e-89
Niben101Scf00113g06004	2.91981	13.1238	-2.1682	0.0023187	0.036755	-//-
Niben101Scf00114g00011	88.2365	179.095	-1.0213	5.0975e-06	0.00030401	-//-
Niben101Scf00117g00006	981.652	673.675	0.54316	0.00065237	0.014312	sp|P35684|RL3_ORYSJ 60S ribosomal protein L3 OS=Oryza sativa subsp. japonica GN=RPL3 PE=2 SV=2//0
Niben101Scf00123g06011	222.092	139.617	0.66968	0.00071259	0.015297	-//-
Niben101Scf00126g01010	233.303	349.828	-0.58444	0.00094775	0.01895	-//-
Niben101Scf00126g07003	140.584	258.258	-0.87738	4.0762e-06	0.00025495	-//-
Niben101Scf00128g05001	160.404	391.282	-1.2865	8.0414e-13	3.4039e-10	sp|Q5XHF8|VIP2_XENLA Inositol hexakisphosphate and diphosphoinositol-pentakisphosphate kinase 2 OS=Xenopus laevis GN=ppip5k2 PE=2 SV=1//0
Niben101Scf00128g05004	145.74	242.11	-0.73227	9.5298e-05	0.0032744	sp|Q9FLD8|PP408_ARATH Pentatricopeptide repeat-containing protein At5g39980, chloroplastic OS=Arabidopsis thaliana GN=At5g39980 PE=2 SV=1//0
Niben101Scf00130g01022	387.468	553.334	-0.51408	0.0017844	0.030366	-//-
Niben101Scf00130g07002	200.027	111.552	0.84248	0.00094535	0.018927	-//-
Niben101Scf00133g01004	78.6766	182.908	-1.2171	0.0028043	0.042302	-//-
Niben101Scf00135g00025	478.747	330.26	0.53566	0.0016214	0.028311	-//-
Niben101Scf00135g00027	225.505	334.402	-0.56842	0.0013503	0.024659	-//-
Niben101Scf00135g03007	49.3511	86.2221	-0.80497	0.0015833	0.027796	-//-
Niben101Scf00138g03003	29.7532	7.50669	1.9868	2.2891e-05	0.0010384	sp|O60231|DHX16_HUMAN Putative pre-mRNA-splicing factor ATP-dependent RNA helicase DHX16 OS=Homo sapiens GN=DHX16 PE=1 SV=2//0
Niben101Scf00144g02016	115.946	246.257	-1.0867	3.9566e-08	4.8415e-06	sp|Q9CAX1|TBL8_ARATH Protein trichome birefringence-like 8 OS=Arabidopsis thaliana GN=TBL8 PE=2 SV=1//5.38084e-29
Niben101Scf00148g01008	125.429	64.7855	0.95313	0.0017329	0.02976	sp|P17407|21KD_DAUCA 21 kDa protein OS=Daucus carota PE=2 SV=1//3.01349e-35
Niben101Scf00149g03002	14.6606	3.40748	2.1052	0.0021267	0.034542	-//-
Niben101Scf00149g06014	61.8035	120.246	-0.96023	6.5271e-05	0.0024085	-//-
Niben101Scf00152g09005	207.829	364.226	-0.80943	5.6841e-06	0.0003328	-//-
Niben101Scf00152g25013	282.015	411.502	-0.54512	0.0018035	0.030597	-//-
Niben101Scf00157g00020	25.2205	50.064	-0.98918	0.0021623	0.034967	-//-
Niben101Scf00161g05002	4626.1	7711.59	-0.73723	5.7914e-07	5.1097e-05	-//-
Niben101Scf00163g08018	144.263	88.6843	0.70195	0.0029135	0.043411	sp|Q9LU64|SODF2_ARATH Superoxide dismutase [Fe] 2, chloroplastic OS=Arabidopsis thaliana GN=FSD2 PE=1 SV=1//6.94743e-107
Niben101Scf00167g00014	65.839	146.018	-1.1491	3.3937e-07	3.2495e-05	-//-
Niben101Scf00167g01003	68.014	36.7578	0.88778	0.0019236	0.032007	-//-
Niben101Scf00167g03010	52.633	6.62626	2.9897	8.8606e-05	0.0030757	-//-
Niben101Scf00168g08008	936.266	522.644	0.84109	1.578e-05	0.0007547	sp|P49209|RL91_ARATH 60S ribosomal protein L9-1 OS=Arabidopsis thaliana GN=RPL9B PE=1 SV=3//4.70384e-117
Niben101Scf00170g05007	1816.23	2663.02	-0.55211	0.00019562	0.0057833	-//-
Niben101Scf00173g00010	1968.15	422.591	2.2195	1.2411e-27	3.981e-24	-//-
Niben101Scf00173g09006	16.9373	143.723	-3.085	5.5451e-16	4.7888e-13	-//-
Niben101Scf00176g02010	360.693	519.897	-0.52745	0.0014255	0.025655	-//-
Niben101Scf00176g06017	19.7271	5.47944	1.8481	0.0015377	0.027209	sp|Q8LDI5|CXXS1_ARATH Thioredoxin-like protein CXXS1 OS=Arabidopsis thaliana GN=CXXS1 PE=2 SV=2//7.31456e-44
Niben101Scf00180g11008	105.165	170.107	-0.69379	0.00079019	0.016596	-//-
Niben101Scf00181g00004	511.873	944.485	-0.88374	3.1631e-08	3.9902e-06	-//-
Niben101Scf00189g00002	175.118	112.616	0.63691	0.0018176	0.030755	-//-
Niben101Scf00193g01002	100.978	174.566	-0.78974	0.00019964	0.0058636	-//-
Niben101Scf00193g03004	11.4725	41.0202	-1.8382	5.9941e-06	0.00034733	sp|Q93ZL5|CDF2_ARATH Cyclic dof factor 2 OS=Arabidopsis thaliana GN=CDF2 PE=1 SV=2//9.92167e-80
Niben101Scf00200g00021	236.96	408.484	-0.78563	7.005e-06	0.00039292	-//-
Niben101Scf00206g00033	872.98	522.463	0.74062	5.2597e-06	0.00031202	sp|O82204|RL281_ARATH 60S ribosomal protein L28-1 OS=Arabidopsis thaliana GN=RPL28A PE=2 SV=1//8.67574e-70
Niben101Scf00207g01005	266.654	540.632	-1.0197	2.3276e-09	4.2148e-07	-//-
Niben101Scf00207g02007	46.6106	13.9341	1.742	2.8774e-06	0.00019042	sp|B8XCH5|QKY_ARATH Protein QUIRKY OS=Arabidopsis thaliana GN=QKY PE=2 SV=1//6.46162e-39
Niben101Scf00211g00023	100.282	185.386	-0.88647	1.726e-05	0.0008108	-//-
Niben101Scf00211g00029	1184.72	511.793	1.2109	1.5027e-05	0.00072717	-//-
Niben101Scf00212g01015	428.87	272.648	0.6535	0.00012959	0.004202	-//-
Niben101Scf00212g01017	142.766	52.8463	1.4338	1.4728e-09	2.8509e-07	-//-
Niben101Scf00213g01002	139.937	44.7084	1.6462	0.0017214	0.029653	sp|Q39202|RLK1_ARATH G-type lectin S-receptor-like serine/threonine-protein kinase RLK1 OS=Arabidopsis thaliana GN=RLK1 PE=2 SV=2//1.25548e-137
Niben101Scf00219g07013	351.405	221.255	0.66742	0.00020095	0.0058904	-//-
Niben101Scf00223g03023	846.133	499.885	0.75929	3.3085e-05	0.0013964	sp|Q2HU68|H2A1_MEDTR Probable histone H2A.1 OS=Medicago truncatula GN=MtrDRAFT_AC149210g1v1 PE=3 SV=1//7.70812e-57
Niben101Scf00225g07012	135.897	317.891	-1.226	3.5558e-09	6.0716e-07	-//-
Niben101Scf00228g08002	11.41	0	Inf	3.9755e-06	0.0002497	-//-
Niben101Scf00229g01002	97.1733	334.594	-1.7838	1.5035e-10	3.7303e-08	-//-
Niben101Scf00233g00015	194.183	416.984	-1.1026	8.1652e-10	1.7215e-07	-//-
Niben101Scf00239g04001	854.473	291.48	1.5516	2.3463e-05	0.0010589	-//-
Niben101Scf00244g00004	346.79	592.608	-0.77302	0.0018521	0.031162	-//-
Niben101Scf00245g04007	45.7769	93.5686	-1.0314	8.0884e-05	0.0028511	sp|Q8LFV3|CDF3_ARATH Cyclic dof factor 3 OS=Arabidopsis thaliana GN=CDF3 PE=1 SV=2//3.45114e-72
Niben101Scf00245g04009	141.65	88.4221	0.67985	0.0019017	0.031747	-//-
Niben101Scf00246g00006	88.4795	51.8902	0.76988	0.0025748	0.039743	-//-
Niben101Scf00246g04005	3498.01	7057.45	-1.0126	2.7746e-08	3.5908e-06	sp|O78328|DXS_CAPAN Probable 1-deoxy-D-xylulose-5-phosphate synthase, chloroplastic OS=Capsicum annuum GN=TKT2 PE=2 SV=1//0
Niben101Scf00247g01007	262.616	388.053	-0.5633	0.001354	0.024694	-//-
Niben101Scf00247g02006	0.583765	30.2521	-5.6955	0.00012035	0.0039593	-//-
Niben101Scf00247g04007	34.0732	78.5138	-1.2043	1.6621e-05	0.00078817	-//-
Niben101Scf00248g02007	128.762	75.5593	0.76902	0.00069094	0.014975	-//-
Niben101Scf00248g02022	32.5421	80.8983	-1.3138	2.498e-06	0.00017023	sp|Q9LS88|PP250_ARATH Pentatricopeptide repeat-containing protein At3g23020 OS=Arabidopsis thaliana GN=At3g23020 PE=2 SV=1//4.9933e-10
Niben101Scf00248g02023	26.3039	51.9301	-0.98129	0.0024064	0.037772	sp|Q9LS88|PP250_ARATH Pentatricopeptide repeat-containing protein At3g23020 OS=Arabidopsis thaliana GN=At3g23020 PE=2 SV=1//1.15252e-12
Niben101Scf00257g02025	108.475	173.683	-0.6791	0.0010125	0.019967	-//-
Niben101Scf00258g02006	327.796	483.186	-0.55978	0.00061325	0.013742	-//-
Niben101Scf00260g00002	162.224	60.1226	1.432	2.9006e-05	0.0012501	-//-
Niben101Scf00262g04001	97.4878	166.069	-0.76849	0.0002348	0.0066235	-//-
Niben101Scf00262g05006	153.953	318.246	-1.0477	6.6503e-07	5.7767e-05	sp|P48522|TCMO_CATRO Trans-cinnamate 4-monooxygenase OS=Catharanthus roseus GN=CYP73A4 PE=2 SV=1//0
Niben101Scf00265g01015	254.968	400.443	-0.65128	0.0033197	0.04761	-//-
Niben101Scf00270g07005	221.14	377.578	-0.77181	1.1712e-05	0.00059565	-//-
Niben101Scf00271g04022	11.7889	2.22825	2.4035	0.0030945	0.045503	-//-
Niben101Scf00271g04024	1469.17	3321.61	-1.1769	0.0008185	0.017033	sp|P46486|PSAF_FLATR Photosystem I reaction center subunit III, chloroplastic OS=Flaveria trinervia GN=PSAF PE=2 SV=1//8.53567e-91
Niben101Scf00271g08009	97.4435	199.04	-1.0304	8.8376e-07	7.2688e-05	-//-
Niben101Scf00272g11021	480.712	319.351	0.59003	0.00066244	0.014447	-//-
Niben101Scf00273g02007	132.366	197.152	-0.57478	0.0034347	0.048758	-//-
Niben101Scf00273g07004	16.8164	57.9258	-1.7843	8.851e-05	0.0030757	-//-
Niben101Scf00273g08002	0	6.34127	#NAME?	0.00044262	0.010534	-//-
Niben101Scf00276g00011	156.475	97.5934	0.68108	0.0014789	0.026365	-//-
Niben101Scf00276g07001	221.378	461.601	-1.0601	4.7527e-09	7.8469e-07	-//-
Niben101Scf00288g03003	18.875	43.1273	-1.1921	0.00061405	0.013752	sp|O22932|CIPKB_ARATH CBL-interacting serine/threonine-protein kinase 11 OS=Arabidopsis thaliana GN=CIPK11 PE=1 SV=1//0
Niben101Scf00288g09010	184.1	340.025	-0.88515	2.9653e-06	0.00019497	-//-
Niben101Scf00288g14003	25.6127	67.135	-1.3902	4.3623e-06	0.00026872	-//-
Niben101Scf00288g16005	949.267	679.416	0.48252	0.0022413	0.035895	-//-
Niben101Scf00296g02008	126.514	298.712	-1.2395	2.0832e-06	0.00014756	-//-
Niben101Scf00298g02018	365.395	527.915	-0.53085	0.00093373	0.018745	sp|P13869|CB12_PETHY Chlorophyll a-b binding protein, chloroplastic OS=Petunia hybrida PE=2 SV=1//1.72949e-80
Niben101Scf00303g00002	172.151	301.4	-0.80801	1.0733e-05	0.00055787	sp|P54928|IMP3_SOLLC Inositol monophosphatase 3 OS=Solanum lycopersicum GN=IMP3 PE=1 SV=1//3.4849e-163
Niben101Scf00304g06001	149.125	239.789	-0.68524	0.00029728	0.0078856	-//-
Niben101Scf00304g07020	69.7655	33.5417	1.0566	0.00032241	0.0083451	-//-
Niben101Scf00304g07023	174.835	100.892	0.79318	0.00015867	0.0049141	sp|O49884|RL30_LUPLU 60S ribosomal protein L30 OS=Lupinus luteus GN=RPL30 PE=3 SV=1//6.06351e-71
Niben101Scf00305g05041	341.044	640.02	-0.90816	4.4327e-07	4.0876e-05	-//-
Niben101Scf00307g03011	1474.75	463.703	1.6692	0.00017027	0.0051769	-//-
Niben101Scf00313g08016	281.46	548.609	-0.96285	4.3972e-09	7.3683e-07	sp|B3LF83|Y74B2_ARATH Probable inactive linolenate hydroperoxide lyase OS=Arabidopsis thaliana GN=CYP74B2 PE=2 SV=1//9.07761e-124
Niben101Scf00317g00011	20.163	2.17456	3.2129	0.0023731	0.037302	-//-
Niben101Scf00317g02010	1178.24	1778.84	-0.5943	9.3015e-05	0.0032132	-//-
Niben101Scf00317g07014	91.8772	23.3814	1.9743	0.002582	0.039775	sp|Q8VZP6|GUX8_ARATH Putative glucuronosyltransferase PGSIP8 OS=Arabidopsis thaliana GN=PGSIP8 PE=2 SV=1//0
Niben101Scf00317g08003	7.07068	21.7747	-1.6227	0.0015054	0.026785	-//-
Niben101Scf00317g08004	7.09022	26.0164	-1.8755	6.2078e-05	0.0023154	-//-
Niben101Scf00318g03014	12.263	32.3013	-1.3973	0.00077768	0.016373	-//-
Niben101Scf00318g09010	70.1291	39.4975	0.82825	0.0032848	0.047356	sp|Q39224|SRG1_ARATH Protein SRG1 OS=Arabidopsis thaliana GN=SRG1 PE=2 SV=1//8.35693e-61
Niben101Scf00318g10005	788.363	1115.01	-0.50013	0.00077519	0.016351	-//-
Niben101Scf00321g02012	205.418	133.829	0.61818	0.0013236	0.024331	sp|P38500|NIR_BETPN Ferredoxin--nitrite reductase, chloroplastic OS=Betula pendula GN=NIR1 PE=2 SV=1//7.29755e-130
Niben101Scf00321g05003	41.3333	72.6585	-0.81383	0.0029836	0.044221	-//-
Niben101Scf00324g01001	215.097	347.044	-0.69013	0.0001082	0.0036421	-//-
Niben101Scf00326g01008	95.0993	24.1193	1.9792	0.001554	0.027367	sp|A6YIH8|C7D55_HYOMU Premnaspirodiene oxygenase OS=Hyoscyamus muticus GN=CYP71D55 PE=1 SV=1//2.30334e-92
Niben101Scf00326g01023	28.6062	5.24815	2.4464	1.984e-06	0.00014111	-//-
Niben101Scf00327g00011	128.267	359.115	-1.4853	2.0915e-15	1.6478e-12	-//-
Niben101Scf00327g01037	25.4807	4.91637	2.3737	0.00073826	0.015728	-//-
Niben101Scf00332g02013	156.1	269.5	-0.78781	3.0586e-05	0.0013057	-//-
Niben101Scf00338g08013	1644.78	970.382	0.76127	9.1447e-07	7.4803e-05	sp|O80377|RSSA_DAUCA 40S ribosomal protein SA OS=Daucus carota GN=179B PE=2 SV=1//1.06846e-132
Niben101Scf00338g08018	727.068	518.506	0.48773	0.002125	0.034525	sp|Q42656|AGAL_COFAR Alpha-galactosidase OS=Coffea arabica PE=1 SV=1//0
Niben101Scf00339g16007	31.3755	107.472	-1.7762	4.92e-09	8.0934e-07	-//-
Niben101Scf00341g02005	1186	1781.16	-0.58671	0.00013029	0.0042186	-//-
Niben101Scf00341g09008	61.3458	104.24	-0.76488	0.0020523	0.033613	-//-
Niben101Scf00341g09017	119.31	73.6868	0.69524	0.0024937	0.038803	-//-
Niben101Scf00350g04018	72.3882	31.5048	1.2002	4.0365e-05	0.0016405	sp|Q6Z2G9|TLP5_ORYSJ Tubby-like F-box protein 5 OS=Oryza sativa subsp. japonica GN=TULP5 PE=2 SV=1//1.44529e-122
Niben101Scf00352g00001	5.31939	17.4378	-1.7129	0.0026085	0.040116	sp|Q93ZL5|CDF2_ARATH Cyclic dof factor 2 OS=Arabidopsis thaliana GN=CDF2 PE=1 SV=2//5.05603e-78
Niben101Scf00360g01005	1059.37	666.854	0.66776	3.1897e-05	0.0013565	-//-
Niben101Scf00361g04019	41.5513	82.4582	-0.98877	0.00025494	0.0070396	-//-
Niben101Scf00366g01013	152.689	73.4736	1.0553	0.0027467	0.041672	-//-
Niben101Scf00367g08003	103.212	230.509	-1.1592	7.2023e-09	1.127e-06	-//-
Niben101Scf00369g02010	77.1475	132.628	-0.78169	0.00049703	0.011559	-//-
Niben101Scf00369g03018	682.586	420.934	0.69742	0.0015416	0.027251	sp|P25469|H2A1_SOLLC Histone H2A.1 OS=Solanum lycopersicum PE=2 SV=1//3.17158e-51
Niben101Scf00369g05011	588.591	419.201	0.48963	0.0032724	0.047253	-//-
Niben101Scf00369g07015	46.2317	99.0348	-1.0991	1.2217e-05	0.00061653	sp|Q9MA60|FH11_ARATH Formin-like protein 11 OS=Arabidopsis thaliana GN=FH11 PE=2 SV=1//0
Niben101Scf00369g07017	1408.63	873.887	0.68877	1.0255e-05	0.00053746	-//-
Niben101Scf00369g12009	853.818	523.57	0.70555	1.6618e-05	0.00078817	-//-
Niben101Scf00369g15012	13.4511	52.12	-1.9541	0.00081148	0.016918	-//-
Niben101Scf00369g18019	829.014	495.867	0.74144	4.3579e-06	0.00026872	-//-
Niben101Scf00369g21009	47.0675	17.5149	1.4261	0.0018021	0.030586	-//-
Niben101Scf00369g24007	62.9182	21.5461	1.5461	2.1472e-06	0.00015067	-//-
Niben101Scf00371g01007	243.763	356.325	-0.54771	0.0017445	0.029912	-//-
Niben101Scf00371g03001	129.922	203.016	-0.64395	0.0010842	0.021043	-//-
Niben101Scf00377g00001	129.447	195.924	-0.59793	0.0031621	0.04624	-//-
Niben101Scf00377g02007	22.2833	7.82198	1.5104	0.0034491	0.048877	-//-
Niben101Scf00380g01005	139.963	259.793	-0.89232	2.964e-06	0.00019497	-//-
Niben101Scf00381g08004	136.357	79.0031	0.78741	0.00057143	0.013009	-//-
Niben101Scf00383g00001	5.03569	17.5755	-1.8033	0.0018002	0.030565	-//-
Niben101Scf00383g03001	38.2004	17.6202	1.1164	0.0035495	0.049937	-//-
Niben101Scf00383g04013	335.379	501.09	-0.57928	0.00049523	0.011529	-//-
Niben101Scf00388g00001	47.4118	97.1537	-1.035	3.6376e-05	0.0015028	-//-
Niben101Scf00388g08017	144.44	229.966	-0.67095	0.00065006	0.014282	-//-
Niben101Scf00389g02010	6.34665	21.2563	-1.7438	0.00068501	0.014875	-//-
Niben101Scf00390g01010	779.708	1585.62	-1.024	2.5799e-06	0.00017475	-//-
Niben101Scf00393g02002	207.725	134.475	0.62734	0.0018234	0.030842	-//-
Niben101Scf00393g03008	122.771	59.298	1.0499	0.00013701	0.0043761	sp|Q8LFN2|Y3037_ARATH Probable inactive leucine-rich repeat receptor-like protein kinase At3g03770 OS=Arabidopsis thaliana GN=At3g03770 PE=2 SV=1//0
Niben101Scf00397g11005	179.865	276.007	-0.61779	0.00058563	0.013256	-//-
Niben101Scf00404g01009	278.794	179.784	0.63294	0.00071125	0.01529	-//-
Niben101Scf00406g05012	311.24	478.685	-0.62105	0.00021561	0.0062189	-//-
Niben101Scf00406g06006	523.964	280.914	0.89934	0.00054037	0.012419	sp|Q94KB7|MLO6_ARATH MLO-like protein 6 OS=Arabidopsis thaliana GN=MLO6 PE=2 SV=2//5.04024e-162
Niben101Scf00408g09007	640.281	391.508	0.70966	3.3259e-05	0.0014024	-//-
Niben101Scf00410g02016	202.535	364.837	-0.84908	1.7489e-06	0.00012792	-//-
Niben101Scf00411g00006	80.2484	39.5533	1.0207	0.00015263	0.0047634	sp|Q9M1S8|GCP2_ARATH Probable glutamate carboxypeptidase 2 OS=Arabidopsis thaliana GN=AMP1 PE=1 SV=3//0
Niben101Scf00414g09001	83.5342	48.5311	0.78346	0.0031805	0.046478	-//-
Niben101Scf00415g00002	85.3068	41.0469	1.0554	0.00012033	0.0039593	-//-
Niben101Scf00418g02007	124.353	187.626	-0.59343	0.0033077	0.047527	-//-
Niben101Scf00419g00001	181.127	57.4207	1.6574	5.0215e-09	8.2001e-07	-//-
Niben101Scf00420g05009	9.97095	27.1116	-1.4431	0.0018905	0.031608	-//-
Niben101Scf00425g03030	95.3596	151.121	-0.66425	0.0020178	0.033156	-//-
Niben101Scf00428g05013	316.69	202.985	0.6417	0.00063487	0.014045	sp|Q96499|RL44_GOSHI 60S ribosomal protein L44 OS=Gossypium hirsutum GN=RPL44 PE=3 SV=3//6.2671e-56
Niben101Scf00428g08011	117.106	57.3139	1.0309	2.4552e-05	0.0010971	-//-
Niben101Scf00428g09005	47.1802	13.572	1.7975	1.1513e-05	0.00058955	-//-
Niben101Scf00446g02007	57.1799	17.1343	1.7386	0.0023831	0.037434	-//-
Niben101Scf00447g01010	112.091	198.052	-0.82121	4.1115e-05	0.0016631	-//-
Niben101Scf00447g02008	266.2	176.977	0.58895	0.0017167	0.029606	-//-
Niben101Scf00447g03012	56.559	24.2294	1.223	0.00079328	0.016637	sp|Q9M153|GDL61_ARATH GDSL esterase/lipase At4g01130 OS=Arabidopsis thaliana GN=At4g01130 PE=2 SV=1//3.40328e-163
Niben101Scf00448g04005	2598.69	1831.85	0.50448	0.00060244	0.013568	-//-
Niben101Scf00449g03001	128.292	197.521	-0.62258	0.0019378	0.032184	-//-
Niben101Scf00449g04003	248.129	388.418	-0.64652	0.00023533	0.0066303	-//-
Niben101Scf00453g07011	261.39	466.663	-0.83618	7.9745e-07	6.7064e-05	sp|Q93XM7|MCAT_ARATH Mitochondrial carnitine/acylcarnitine carrier-like protein OS=Arabidopsis thaliana GN=BOU PE=2 SV=1//5.01672e-156
Niben101Scf00454g02005	241.475	157.195	0.61932	0.00092595	0.018613	sp|P53118|ROG1_YEAST Putative lipase ROG1 OS=Saccharomyces cerevisiae (strain ATCC 204508 / S288c) GN=ROG1 PE=1 SV=1//2.94237e-11
Niben101Scf00454g05005	438.164	310.194	0.4983	0.0035329	0.049767	-//-
Niben101Scf00456g00008	23.5625	7.39931	1.671	0.0012634	0.023563	-//-
Niben101Scf00457g02012	147.457	87.4481	0.75379	0.0006103	0.013683	sp|Q9UNX4|WDR3_HUMAN WD repeat-containing protein 3 OS=Homo sapiens GN=WDR3 PE=1 SV=1//0
Niben101Scf00457g11002	34.7254	101.536	-1.5479	8.2216e-09	1.2644e-06	-//-
Niben101Scf00461g04004	96.6088	166.584	-0.78603	0.00021799	0.0062696	-//-
Niben101Scf00465g01006	134.602	203.982	-0.59974	0.002297	0.036501	-//-
Niben101Scf00465g07001	94.9058	52.8664	0.84415	0.00070981	0.015274	-//-
Niben101Scf00466g01013	440.551	276.673	0.67113	0.00013412	0.0043115	-//-
Niben101Scf00471g01002	264.157	108.648	1.2817	7.0193e-09	1.1022e-06	-//-
Niben101Scf00472g00003	252.873	130.214	0.95752	1.2905e-06	9.9574e-05	sp|Q9XHS0|RS12_HORVU 40S ribosomal protein S12 OS=Hordeum vulgare GN=RPS12 PE=2 SV=1//5.28215e-60
Niben101Scf00472g03005	275.197	396.27	-0.52602	0.0028255	0.042522	-//-
Niben101Scf00472g05009	91.2908	156.383	-0.77654	0.00028428	0.0076445	-//-
Niben101Scf00477g00010	131.582	198.475	-0.59299	0.0032405	0.04702	-//-
Niben101Scf00480g00002	1483.66	2251.24	-0.60157	3.6762e-05	0.0015174	-//-
Niben101Scf00481g04007	129.144	283.55	-1.1346	2.9186e-08	3.7466e-06	-//-
Niben101Scf00482g03002	177.824	296.637	-0.73824	4.7743e-05	0.0018709	sp|O23826|K125_TOBAC 125 kDa kinesin-related protein OS=Nicotiana tabacum GN=TKRP125 PE=1 SV=1//4.17564e-23
Niben101Scf00482g10003	171.941	256.253	-0.57565	0.0027645	0.041885	sp|Q42601|CARB_ARATH Carbamoyl-phosphate synthase large chain, chloroplastic OS=Arabidopsis thaliana GN=CARB PE=1 SV=1//0
Niben101Scf00483g03004	240.219	391.057	-0.70303	4.3224e-05	0.0017269	-//-
Niben101Scf00484g01005	431.444	250.27	0.78569	0.0001666	0.0050931	-//-
Niben101Scf00491g04045	470.19	706.455	-0.58735	0.00030963	0.0081267	-//-
Niben101Scf00493g00008	33.8211	63.0501	-0.89858	0.0021094	0.034335	-//-
Niben101Scf00496g00001	1208.78	1716.19	-0.50566	0.00063417	0.014036	-//-
Niben101Scf00496g01001	496.996	324.448	0.61525	0.00034012	0.0086538	sp|Q9XF97|RL4_PRUAR 60S ribosomal protein L4 OS=Prunus armeniaca GN=RPL4 PE=2 SV=1//0
Niben101Scf00505g07001	339.688	567.643	-0.74078	6.6085e-06	0.00037614	-//-
Niben101Scf00508g06005	309.353	719.972	-1.2187	8.239e-07	6.8901e-05	-//-
Niben101Scf00508g10015	233.988	376.172	-0.68496	0.00011734	0.0038802	-//-
Niben101Scf00519g00010	1314.21	1942.33	-0.5636	0.0029276	0.043606	-//-
Niben101Scf00525g04006	436.768	244.798	0.83528	1.0062e-06	8.1126e-05	-//-
Niben101Scf00528g01012	64.7225	28.9496	1.1607	0.00013549	0.0043431	sp|P68428|H32_WHEAT Histone H3.2 OS=Triticum aestivum PE=1 SV=2//7.67285e-44
Niben101Scf00530g06012	60.9048	233.779	-1.9405	3.1567e-20	4.573e-17	-//-
Niben101Scf00536g05012	1508.99	2493.36	-0.72451	1.8516e-06	0.00013347	sp|Q55680|Y005_SYNY3 Uncharacterized protein sll0005 OS=Synechocystis sp. (strain PCC 6803 / Kazusa) GN=sll0005 PE=3 SV=1//1.98136e-124
Niben101Scf00537g00005	59.0386	105.465	-0.83703	0.001767	0.030131	-//-
Niben101Scf00538g05002	149.805	240.108	-0.6806	0.00034862	0.0088301	-//-
Niben101Scf00539g01011	128.962	210.73	-0.70845	0.00032689	0.0084222	-//-
Niben101Scf00539g03006	239.681	350.161	-0.5469	0.0019368	0.032184	-//-
Niben101Scf00539g05012	32.6733	11.6755	1.4846	0.00056607	0.012917	-//-
Niben101Scf00542g05006	149.03	224.613	-0.59184	0.0017934	0.030495	-//-
Niben101Scf00543g00008	397.894	673.176	-0.7586	5.0188e-06	0.00030011	-//-
Niben101Scf00550g00010	15.5598	2.59723	2.5828	0.00032739	0.0084303	-//-
Niben101Scf00551g05013	233.559	128.379	0.86337	1.2717e-05	0.00063668	-//-
Niben101Scf00557g03004	59.9903	24.4814	1.293	0.00030195	0.0079823	-//-
Niben101Scf00558g00006	3.86816	40.1844	-3.3769	1.7984e-12	6.9621e-10	-//-
Niben101Scf00558g00007	2.6515	26.0446	-3.2961	1.539e-08	2.1666e-06	-//-
Niben101Scf00561g00010	79.1598	128.287	-0.69654	0.0018858	0.031541	-//-
Niben101Scf00563g01003	588.329	1081.07	-0.87777	3.8346e-08	4.7309e-06	-//-
Niben101Scf00567g04008	46.1293	138.315	-1.5842	1.9438e-06	0.00013915	-//-
Niben101Scf00568g04019	3.17174	247.845	-6.288	2.764e-79	1.2413e-74	-//-
Niben101Scf00568g04020	1.73591	15.8125	-3.1873	0.00032307	0.0083526	-//-
Niben101Scf00568g04021	0.755791	26.0563	-5.1075	1.2202e-11	3.8589e-09	-//-
Niben101Scf00570g03008	138.42	217.88	-0.65447	0.00084909	0.017491	-//-
Niben101Scf00570g03009	234.97	489.504	-1.0588	8.7503e-10	1.8236e-07	-//-
Niben101Scf00571g00006	123.349	43.6531	1.4986	2.7851e-09	4.9436e-07	-//-
Niben101Scf00571g04013	468.65	1157.9	-1.3049	2.2978e-05	0.0010413	-//-
Niben101Scf00571g10002	412.69	685.227	-0.73152	5.5302e-06	0.00032464	sp|Q9C5M0|DTC_ARATH Mitochondrial dicarboxylate/tricarboxylate transporter DTC OS=Arabidopsis thaliana GN=DTC PE=1 SV=1//4.47503e-167
Niben101Scf00573g00013	214.95	336.536	-0.64676	0.00034816	0.0088285	-//-
Niben101Scf00574g03004	294.911	198.049	0.57442	0.0015419	0.027251	-//-
Niben101Scf00576g02001	73.8446	233.102	-1.6584	1.4681e-15	1.1773e-12	-//-
Niben101Scf00577g09001	53.9907	19.3184	1.4827	2.4732e-05	0.0011001	-//-
Niben101Scf00577g12010	317.501	68.0382	2.2223	7.6259e-27	2.2831e-23	-//-
Niben101Scf00578g07005	219.283	372.117	-0.76296	2.1401e-05	0.00097869	-//-
Niben101Scf00581g00002	69.8208	130.314	-0.90026	7.8256e-05	0.0027847	sp|Q8LPK5|CESA8_ARATH Cellulose synthase A catalytic subunit 8 [UDP-forming] OS=Arabidopsis thaliana GN=CESA8 PE=1 SV=1//0
Niben101Scf00582g01034	896.967	651.055	0.46228	0.0034757	0.049161	-//-
Niben101Scf00582g01036	36.4317	10.0991	1.851	1.2231e-05	0.00061653	-//-
Niben101Scf00592g06001	20.2811	49.1823	-1.278	0.0024271	0.038045	-//-
Niben101Scf00592g14018	51.6534	90.7056	-0.81233	0.0014594	0.026116	-//-
Niben101Scf00593g03002	132.664	38.6633	1.7787	2.2999e-12	8.466e-10	sp|Q9FM19|HIR1_ARATH Hypersensitive-induced response protein 1 OS=Arabidopsis thaliana GN=HIR1 PE=1 SV=1//0
Niben101Scf00594g00001	358.165	715.134	-0.99759	0.0005774	0.013103	-//-
Niben101Scf00595g04003	375.612	245.522	0.61339	0.00057212	0.013009	-//-
Niben101Scf00595g08039	122.508	186.664	-0.60756	0.0028149	0.042388	-//-
Niben101Scf00596g02004	16.3955	3.73926	2.1325	0.0010974	0.021214	-//-
Niben101Scf00597g08019	543.434	330.296	0.71835	2.4776e-05	0.0011005	sp|Q07760|RL23_TOBAC 60S ribosomal protein L23 OS=Nicotiana tabacum GN=RPL23 PE=2 SV=1//2.91007e-93
Niben101Scf00606g00009	341.536	671.322	-0.97497	3.0883e-09	5.3547e-07	-//-
Niben101Scf00606g02002	187.186	284.064	-0.60174	0.0012933	0.023954	sp|Q9FWS1|AUL1_ARATH Auxilin-like protein 1 OS=Arabidopsis thaliana GN=AUL1 PE=2 SV=2//9.10018e-09
Niben101Scf00607g03013	434.75	935.577	-1.1057	2.0353e-12	7.746e-10	-//-
Niben101Scf00611g01010	65.6718	31.2735	1.0703	0.00026705	0.0072815	sp|Q8GZ92|BRXL4_ARATH Protein Brevis radix-like 4 OS=Arabidopsis thaliana GN=BRXL4 PE=2 SV=1//1.01462e-136
Niben101Scf00611g08016	136.521	210.488	-0.62462	0.0018787	0.03148	-//-
Niben101Scf00614g00028	77.4361	40.1748	0.94671	0.00046583	0.010991	sp|O23547|EXLB1_ARATH Expansin-like B1 OS=Arabidopsis thaliana GN=EXLB1 PE=2 SV=2//9.51957e-57
Niben101Scf00618g05002	351.695	211.31	0.73496	2.6314e-05	0.0011551	-//-
Niben101Scf00621g05002	149.77	921.342	-2.621	7.1548e-17	7.1401e-14	-//-
Niben101Scf00621g06003	78.8157	129.527	-0.7167	0.0017698	0.030162	-//-
Niben101Scf00626g01002	998.29	659.614	0.59784	0.0001584	0.0049125	sp|Q9M352|RL362_ARATH 60S ribosomal protein L36-2 OS=Arabidopsis thaliana GN=RPL36B PE=2 SV=1//1.32247e-49
Niben101Scf00629g00001	47.3562	89.814	-0.92339	0.00034342	0.0087216	-//-
Niben101Scf00630g03001	316.072	474.159	-0.58512	0.00054255	0.012457	-//-
Niben101Scf00635g00001	70.2528	120.895	-0.78313	0.0008378	0.017338	-//-
Niben101Scf00635g04005	36.5856	6.81285	2.4249	0.00082326	0.0171	-//-
Niben101Scf00637g04001	261.872	128.652	1.0254	0.0026702	0.04087	sp|Q05091|PGIP_PYRCO Polygalacturonase inhibitor OS=Pyrus communis GN=PGIP PE=1 SV=1//6.88938e-148
Niben101Scf00638g00005	28.8162	63.4467	-1.1387	0.00015254	0.0047634	-//-
Niben101Scf00640g00014	400.448	282.24	0.50469	0.0034574	0.048949	-//-
Niben101Scf00640g04023	20.4543	2.52493	3.0181	0.00023666	0.0066467	-//-
Niben101Scf00646g04009	675.13	456.73	0.56382	0.00075484	0.015997	sp|P35684|RL3_ORYSJ 60S ribosomal protein L3 OS=Oryza sativa subsp. japonica GN=RPL3 PE=2 SV=2//0
Niben101Scf00647g02002	379.273	956.4	-1.3344	1.8621e-13	9.7234e-11	-//-
Niben101Scf00647g02011	746.644	528.968	0.49724	0.0023201	0.03676	-//-
Niben101Scf00652g01007	78.9994	27.2052	1.538	0.00041209	0.010063	-//-
Niben101Scf00653g01009	688.709	1094.37	-0.66814	1.1966e-05	0.00060719	-//-
Niben101Scf00654g03010	151.747	84.6355	0.84234	0.0033924	0.048287	-//-
Niben101Scf00661g01014	241.705	133.276	0.85883	6.7126e-06	0.00038054	-//-
Niben101Scf00662g00006	90.8515	176.327	-0.95667	3.7235e-06	0.00023685	-//-
Niben101Scf00663g02007	156.658	73.8431	1.0851	1.3712e-06	0.00010455	-//-
Niben101Scf00664g00021	111.742	185.555	-0.73167	0.00032525	0.0083896	-//-
Niben101Scf00672g00001	327.954	481.848	-0.55509	0.00092498	0.018611	sp|P53492|ACT7_ARATH Actin-7 OS=Arabidopsis thaliana GN=ACT7 PE=1 SV=1//0
Niben101Scf00672g04011	328.786	532.567	-0.69582	4.8217e-05	0.0018845	-//-
Niben101Scf00674g00009	30.7549	77.5881	-1.335	3.4004e-05	0.0014285	-//-
Niben101Scf00681g01005	221.884	140.841	0.65574	0.00065588	0.014375	-//-
Niben101Scf00683g02004	174.674	83.3918	1.0667	3.7641e-05	0.0015494	-//-
Niben101Scf00683g03019	180.166	113.039	0.67251	0.0011298	0.021683	sp|Q42545|FTSZ1_ARATH Cell division protein FtsZ homolog 1, chloroplastic OS=Arabidopsis thaliana GN=FTSZ1 PE=1 SV=2//2.69557e-176
Niben101Scf00683g03043	270.02	148.143	0.86608	2.2254e-05	0.0010115	-//-
Niben101Scf00687g04018	318.146	490.932	-0.62583	0.00015121	0.0047453	-//-
Niben101Scf00688g00002	85.1003	138.373	-0.70133	0.00087671	0.01788	sp|Q8RXE8|BASS3_ARATH Probable sodium/metabolite cotransporter BASS3, chloroplastic OS=Arabidopsis thaliana GN=BASS3 PE=2 SV=1//1.79064e-179
Niben101Scf00690g00013	12.7679	35.5291	-1.4765	0.00027597	0.0074838	-//-
Niben101Scf00691g04016	51.6382	88.4491	-0.77641	0.0022596	0.036111	-//-
Niben101Scf00693g02022	47.1841	82.2386	-0.80151	0.0025632	0.039624	-//-
Niben101Scf00698g00008	16.4754	3.07359	2.4223	0.00054614	0.012532	-//-
Niben101Scf00704g03002	153.318	287.184	-0.90544	1.6303e-06	0.00012141	-//-
Niben101Scf00705g01010	89.1574	140.555	-0.65671	0.0027809	0.042049	-//-
Niben101Scf00709g04010	307.03	542.424	-0.82104	1.3552e-06	0.00010385	-//-
Niben101Scf00709g07008	554.944	841.093	-0.59992	0.00013563	0.0043443	-//-
Niben101Scf00709g07009	5065.07	1900.51	1.4142	0.00021997	0.006308	-//-
Niben101Scf00712g09029	397.284	910.009	-1.1957	0.0013656	0.024859	sp|P09044|G3PB_TOBAC Glyceraldehyde-3-phosphate dehydrogenase B, chloroplastic (Fragment) OS=Nicotiana tabacum GN=GAPB PE=2 SV=1//1.23687e-133
Niben101Scf00712g14003	24.5722	75.7708	-1.6246	8.6682e-05	0.003027	-//-
Niben101Scf00713g02004	2.71602	89.6794	-5.0452	1.4135e-24	3.5266e-21	-//-
Niben101Scf00713g05006	141.83	226.31	-0.67413	0.00048247	0.011303	-//-
Niben101Scf00714g06004	179.449	109.567	0.71177	0.00050984	0.011814	-//-
Niben101Scf00715g00005	29.1397	63.2085	-1.1171	0.00028445	0.0076445	-//-
Niben101Scf00715g04003	183.005	329.951	-0.85037	2.6473e-06	0.00017783	-//-
Niben101Scf00717g00006	219.805	530.806	-1.272	6.0678e-13	2.6455e-10	-//-
Niben101Scf00721g00010	307.516	649.685	-1.0791	2.1111e-05	0.00096838	sp|Q9SUQ3|Y4374_ARATH Probable inactive receptor kinase At4g23740 OS=Arabidopsis thaliana GN=At4g23740 PE=2 SV=1//0
Niben101Scf00730g00026	476.947	281.428	0.76106	1.0379e-05	0.0005414	-//-
Niben101Scf00732g07002	51.6812	24.2501	1.0917	0.00080584	0.016824	-//-
Niben101Scf00734g00002	217.108	358.133	-0.72208	5.1519e-05	0.0019979	-//-
Niben101Scf00736g04011	1166.36	757.809	0.6221	8.727e-05	0.0030401	sp|Q9FJA6|RS33_ARATH 40S ribosomal protein S3-3 OS=Arabidopsis thaliana GN=RPS3C PE=1 SV=1//5.17278e-141
Niben101Scf00737g01010	1.51574	12.834	-3.0819	0.00013897	0.0044169	-//-
Niben101Scf00739g00002	831.881	3.19539	8.0242	1.7145e-10	4.1567e-08	-//-
Niben101Scf00739g00003	398.06	5.50763	6.1754	8.2378e-08	9.4133e-06	-//-
Niben101Scf00745g00015	325.687	206.87	0.65476	0.00069198	0.014991	-//-
Niben101Scf00749g04008	464.413	297.328	0.64335	0.00019237	0.0057023	-//-
Niben101Scf00749g04013	520.336	286.028	0.86329	7.4653e-06	0.00041491	-//-
Niben101Scf00753g03018	434.995	184.442	1.2378	9.4012e-06	0.00050022	-//-
Niben101Scf00761g02006	1660.41	3027.45	-0.86656	0.00082641	0.017134	-//-
Niben101Scf00761g05018	1597.33	1128.67	0.50105	0.0008312	0.017217	-//-
Niben101Scf00764g02011	182.11	435.761	-1.2587	1.8457e-12	7.0844e-10	-//-
Niben101Scf00774g00002	104.698	182.357	-0.80053	0.00016845	0.0051427	-//-
Niben101Scf00776g02002	38.8396	92.4319	-1.2509	1.9276e-06	0.00013828	-//-
Niben101Scf00776g04004	55.9938	18.4932	1.5983	0.00017876	0.0053804	-//-
Niben101Scf00780g02006	111.583	59.1051	0.91676	0.0001731	0.0052383	-//-
Niben101Scf00783g05024	81.4281	197.249	-1.2764	2.2951e-09	4.1729e-07	-//-
Niben101Scf00784g00007	377.958	558.095	-0.56228	0.00060724	0.013635	-//-
Niben101Scf00788g02014	146.477	232.692	-0.66774	0.00052694	0.012154	-//-
Niben101Scf00788g03017	272.765	500.222	-0.87491	2.7306e-07	2.6833e-05	-//-
Niben101Scf00790g00004	107.994	55.4051	0.96285	0.0013547	0.024694	-//-
Niben101Scf00795g00011	482.182	216.055	1.1582	4.8916e-11	1.3992e-08	-//-
Niben101Scf00797g18009	1704.94	2971.38	-0.80141	7.2577e-08	8.4219e-06	-//-
Niben101Scf00799g00011	53.5833	111.383	-1.0557	9.9377e-06	0.00052504	sp|Q39013|NAC2_ARATH NAC domain-containing protein 2 OS=Arabidopsis thaliana GN=NAC002 PE=2 SV=2//4.25183e-135
Niben101Scf00801g02008	131.608	78.7286	0.74129	0.001034	0.020303	-//-
Niben101Scf00801g04008	110.138	168.994	-0.61766	0.0025174	0.039078	-//-
Niben101Scf00809g01011	349.236	661.801	-0.92219	2.3182e-08	3.0984e-06	sp|P22337|STAD_RICCO Acyl-[acyl-carrier-protein] desaturase, chloroplastic OS=Ricinus communis PE=1 SV=1//1.62093e-79
Niben101Scf00811g05002	8.62016	23.5919	-1.4525	0.0022772	0.036276	-//-
Niben101Scf00812g02008	11.4508	1.4738	2.9578	0.0014301	0.0257	-//-
Niben101Scf00813g01007	217.128	331.657	-0.61114	0.00090104	0.018268	-//-
Niben101Scf00815g00012	146.098	56.5153	1.3702	2.8112e-05	0.0012174	sp|Q7ZV60|BCS1_DANRE Mitochondrial chaperone BCS1 OS=Danio rerio GN=bcs1l PE=2 SV=2//9.48693e-32
Niben101Scf00817g03007	93.4651	48.7629	0.93864	0.00025993	0.0071394	-//-
Niben101Scf00818g02006	3.0007	28.4627	-3.2457	0.0033581	0.047921	-//-
Niben101Scf00819g11005	24.4073	91.8227	-1.9115	8.7714e-10	1.8236e-07	-//-
Niben101Scf00821g04002	14.0072	40.9059	-1.5461	0.00021844	0.0062722	-//-
Niben101Scf00821g14010	21.6042	49.5402	-1.1973	0.00037131	0.0092637	-//-
Niben101Scf00821g16001	19.7097	0.350377	5.8139	7.9148e-05	0.0028076	-//-
Niben101Scf00825g02017	77.1485	170.901	-1.1475	0.00013446	0.0043162	-//-
Niben101Scf00825g02018	41.8413	72.5649	-0.79434	0.0033319	0.047698	-//-
Niben101Scf00833g00004	87.6145	50.8418	0.78515	0.0033029	0.047527	-//-
Niben101Scf00839g00001	290.584	560.234	-0.94707	3.7602e-08	4.6648e-06	-//-
Niben101Scf00841g02021	10248.8	7246.86	0.50002	0.00062201	0.013883	-//-
Niben101Scf00849g01017	1154.25	597.983	0.94878	9.1185e-06	0.00048807	-//-
Niben101Scf00850g00005	12.7087	1.85448	2.7767	0.0024211	0.037976	-//-
Niben101Scf00850g01029	172.285	338.954	-0.97629	0.00081969	0.01705	-//-
Niben101Scf00850g01031	43.1017	92.3453	-1.0993	3.4238e-05	0.0014356	-//-
Niben101Scf00851g00022	134.928	211.142	-0.64603	0.00071051	0.015281	-//-
Niben101Scf00853g04007	44.2788	79.6111	-0.84635	0.0012381	0.02318	-//-
Niben101Scf00853g07006	523.838	318.944	0.71582	0.00016073	0.0049642	-//-
Niben101Scf00854g01012	0	53.7678	#NAME?	0.00038964	0.0096188	-//-
Niben101Scf00857g01003	82.3973	162.58	-0.98048	4.4889e-06	0.0002746	sp|O22203|C98A3_ARATH Cytochrome P450 98A3 OS=Arabidopsis thaliana GN=CYP98A3 PE=1 SV=1//0
Niben101Scf00858g00009	1164.2	798.691	0.54363	0.00043491	0.010417	-//-
Niben101Scf00858g04015	591.527	392.107	0.59319	0.00041762	0.010146	-//-
Niben101Scf00858g05001	659.647	428.133	0.62363	0.00015754	0.004896	sp|P29766|RL8_SOLLC 60S ribosomal protein L8 OS=Solanum lycopersicum GN=RPL8 PE=2 SV=1//3.25812e-168
Niben101Scf00858g06022	86.9985	52.0954	0.73983	0.0032635	0.0472	-//-
Niben101Scf00860g03018	628.674	1678.18	-1.4165	6.0404e-20	8.2201e-17	-//-
Niben101Scf00864g00004	552.113	335.749	0.71758	0.00021225	0.0061444	sp|Q22053|FBRL_CAEEL rRNA 2&apos;-O-methyltransferase fibrillarin OS=Caenorhabditis elegans GN=fib-1 PE=3 SV=1//2.33101e-67
Niben101Scf00864g01003	59.3848	100.974	-0.76582	0.0019143	0.031911	-//-
Niben101Scf00868g07005	203.83	392.956	-0.947	5.0321e-08	6.0422e-06	-//-
Niben101Scf00872g01003	88.9063	14.2169	2.6447	2.8485e-06	0.00018895	-//-
Niben101Scf00873g02007	80.6171	43.7956	0.8803	0.0012128	0.022871	sp|Q93ZR6|WSD1_ARATH O-acyltransferase WSD1 OS=Arabidopsis thaliana GN=WSD1 PE=2 SV=1//2.62266e-38
Niben101Scf00876g02002	48.9743	115.283	-1.2351	6.7081e-07	5.8155e-05	sp|Q93ZR6|WSD1_ARATH O-acyltransferase WSD1 OS=Arabidopsis thaliana GN=WSD1 PE=2 SV=1//5.2969e-84
Niben101Scf00878g04013	3.69515	41.5248	-3.4903	2.4379e-13	1.2165e-10	sp|Q8GXL3|SPL8_ARATH Squamosa promoter-binding-like protein 8 OS=Arabidopsis thaliana GN=SPL8 PE=1 SV=2//4.17733e-34
Niben101Scf00883g13017	13.0875	30.4048	-1.2161	0.0030084	0.0445	-//-
Niben101Scf00884g00017	149.213	253.506	-0.76465	0.0021737	0.035113	-//-
Niben101Scf00887g02002	171.263	319.379	-0.89905	6.7875e-05	0.0024863	-//-
Niben101Scf00887g02006	794.112	358.16	1.1487	9.4938e-05	0.0032646	-//-
Niben101Scf00891g04008	209.25	301.784	-0.52829	0.0032245	0.046894	-//-
Niben101Scf00892g00017	83.9216	136.915	-0.70617	0.0024848	0.038745	-//-
Niben101Scf00894g01011	163.944	96.8003	0.76012	0.00038893	0.0096074	sp|Q9M888|TCPZA_ARATH T-complex protein 1 subunit zeta 1 OS=Arabidopsis thaliana GN=CCT6A PE=1 SV=1//0
Niben101Scf00895g00019	68.8578	117.497	-0.77093	0.0011784	0.022376	-//-
Niben101Scf00898g01009	369.601	225.296	0.71415	0.0013226	0.024331	-//-
Niben101Scf00901g06008	233.654	159.195	0.55358	0.0032721	0.047253	-//-
Niben101Scf00904g03002	46.8748	87.1343	-0.89443	0.00059783	0.013486	-//-
Niben101Scf00905g01002	23.4897	57.987	-1.3037	0.00089212	0.018112	-//-
Niben101Scf00905g06006	172.861	289.19	-0.7424	6.4141e-05	0.0023805	-//-
Niben101Scf00905g10005	192.356	105.231	0.87022	0.00015287	0.0047675	-//-
Niben101Scf00905g13001	298.167	41.184	2.856	0.00023242	0.0065849	-//-
Niben101Scf00912g04004	388.596	228.666	0.76503	1.7906e-05	0.00083591	sp|P49215|RS17_SOLLC 40S ribosomal protein S17 OS=Solanum lycopersicum GN=RPS17 PE=2 SV=3//6.62432e-91
Niben101Scf00918g04012	76.2891	41.2908	0.88566	0.0010964	0.021213	-//-
Niben101Scf00919g03002	597.48	1410.41	-1.2392	2.2074e-13	1.1265e-10	sp|P73627|Y1770_SYNY3 Uncharacterized protein sll1770 OS=Synechocystis sp. (strain PCC 6803 / Kazusa) GN=sll1770 PE=3 SV=1//2.89805e-30
Niben101Scf00919g07002	216.897	659.808	-1.605	8.6143e-07	7.1244e-05	sp|H2DH18|C7A12_PANGI Cytochrome P450 CYP736A12 OS=Panax ginseng PE=2 SV=1//3.49556e-167
Niben101Scf00920g00002	39.6311	120.103	-1.5996	7.7013e-06	0.00042333	-//-
Niben101Scf00925g02012	205.244	136.785	0.58543	0.0025267	0.039209	-//-
Niben101Scf00926g01011	1648.17	2588.2	-0.65109	9.0705e-06	0.00048666	-//-
Niben101Scf00927g02017	197.795	122.932	0.68614	0.00080061	0.016738	sp|Q55512|DHAS_SYNY3 Aspartate-semialdehyde dehydrogenase OS=Synechocystis sp. (strain PCC 6803 / Kazusa) GN=asd PE=3 SV=2//4.05748e-98
Niben101Scf00927g13002	261.563	411.052	-0.65216	0.00026128	0.0071676	sp|Q9SXB8|Y1133_ARATH G-type lectin S-receptor-like serine/threonine-protein kinase At1g11330 OS=Arabidopsis thaliana GN=At1g11330 PE=2 SV=3//5.79901e-71
Niben101Scf00936g00004	26.3819	7.81029	1.7561	0.00032077	0.0083123	-//-
Niben101Scf00936g02010	46.8899	7.26582	2.6901	9.9339e-05	0.0033925	sp|Q94LW6|SUT35_ARATH Probable sulfate transporter 3.5 OS=Arabidopsis thaliana GN=SULTR3;5 PE=2 SV=1//0
Niben101Scf00938g01003	50.2718	86.3799	-0.78095	0.0028561	0.042825	-//-
Niben101Scf00941g02004	400.923	264.746	0.59872	0.0005717	0.013009	-//-
Niben101Scf00949g01013	584.907	301.927	0.95401	8.2638e-06	0.00045092	sp|Q9FVE6|HDT1_ARATH Histone deacetylase HDT1 OS=Arabidopsis thaliana GN=HDT1 PE=1 SV=1//2.94736e-29
Niben101Scf00949g03003	1061.84	1703.62	-0.68203	5.3719e-06	0.00031742	sp|Q8LPR8|TI100_ARATH Protein TIC 100 OS=Arabidopsis thaliana GN=TIC100 PE=1 SV=1//0
Niben101Scf00951g00005	179.922	109.447	0.71714	0.00062342	0.013904	-//-
Niben101Scf00952g01005	78.8607	128.481	-0.70418	0.0023316	0.036869	-//-
Niben101Scf00960g15006	645.242	1028.96	-0.67328	1.689e-05	0.00079842	-//-
Niben101Scf00961g00001	47.774	94.7404	-0.98775	0.0026202	0.040242	-//-
Niben101Scf00961g04012	255.44	562.306	-1.1384	1.3932e-11	4.3447e-09	-//-
Niben101Scf00963g02001	64.4654	35.3425	0.86712	0.0028716	0.042971	-//-
Niben101Scf00966g01002	830.234	553.001	0.58624	0.00030199	0.0079823	-//-
Niben101Scf00972g00009	137.527	228.915	-0.7351	0.00012732	0.0041462	-//-
Niben101Scf00975g01004	117.716	221.132	-0.90961	1.9362e-05	0.00089457	-//-
Niben101Scf00978g09002	670.773	1096.2	-0.70861	0.0029069	0.043363	-//-
Niben101Scf00978g12003	271.748	173.209	0.64976	0.00046848	0.011032	sp|Q8L7Y9|NPC1_ARATH Non-specific phospholipase C1 OS=Arabidopsis thaliana GN=NPC1 PE=2 SV=1//0
Niben101Scf00980g07019	95.6665	159.169	-0.73447	0.00037522	0.0093509	-//-
Niben101Scf00983g01007	255.575	418.548	-0.71165	4.2382e-05	0.0016994	-//-
Niben101Scf00983g02001	4422.37	2033.33	1.121	0.00024853	0.0068937	sp|P50218|IDHC_TOBAC Isocitrate dehydrogenase [NADP] OS=Nicotiana tabacum PE=2 SV=1//0
Niben101Scf00987g02009	171.481	302.309	-0.81798	1.3652e-05	0.00067151	-//-
Niben101Scf00988g04026	103.755	205.974	-0.98927	1.7394e-06	0.00012743	-//-
Niben101Scf00991g05009	659.431	460.233	0.51886	0.0017976	0.030536	-//-
Niben101Scf00991g13022	368.883	128.585	1.5204	1.5157e-13	8.2009e-11	sp|Q9FN11|LBD37_ARATH LOB domain-containing protein 37 OS=Arabidopsis thaliana GN=LBD37 PE=2 SV=1//7.48369e-76
Niben101Scf01001g00003	7.57771	0	Inf	0.0012593	0.023496	-//-
Niben101Scf01002g00008	155.135	296.057	-0.93235	0.00018734	0.0055794	-//-
Niben101Scf01002g02011	296.064	450.531	-0.60572	0.00039957	0.0098055	-//-
Niben101Scf01005g01002	761.013	544.669	0.48254	0.0022295	0.035797	-//-
Niben101Scf01005g01014	50.609	101.933	-1.0102	5.1144e-05	0.0019851	-//-
Niben101Scf01005g11010	1604.22	2256.83	-0.49243	0.00085405	0.017553	-//-
Niben101Scf01008g01008	2789.39	21.2797	7.0343	2.8859e-09	5.1024e-07	sp|Q05349|12KD_FRAAN Auxin-repressed 12.5 kDa protein OS=Fragaria ananassa PE=2 SV=1//6.79934e-27
Niben101Scf01008g03017	90.699	44.9886	1.0115	0.00013438	0.0043162	-//-
Niben101Scf01012g01015	239.612	426.242	-0.83097	2.3811e-06	0.00016425	-//-
Niben101Scf01015g01002	179.389	15.7747	3.5074	0.00014171	0.0044944	sp|P09762|WIN2_SOLTU Wound-induced protein WIN2 OS=Solanum tuberosum GN=WIN2 PE=2 SV=1//3.89954e-96
Niben101Scf01017g03006	1189.95	3008.62	-1.3382	1.7745e-06	0.00012957	sp|Q9SYK9|U74E2_ARATH UDP-glycosyltransferase 74E2 OS=Arabidopsis thaliana GN=UGT74E2 PE=1 SV=1//1.7046e-125
Niben101Scf01018g08011	61.6644	119.621	-0.95596	5.7444e-05	0.0021825	-//-
Niben101Scf01022g00014	194.444	109.031	0.83461	4.6837e-05	0.0018418	sp|Q9LSM9|SCP33_ARATH Serine carboxypeptidase-like 33 OS=Arabidopsis thaliana GN=SCPL33 PE=2 SV=2//6.30773e-13
Niben101Scf01025g01013	496.187	824.259	-0.73221	0.0028269	0.042529	sp|Q944G9|ALFC2_ARATH Probable fructose-bisphosphate aldolase 2, chloroplastic OS=Arabidopsis thaliana GN=FBA2 PE=1 SV=2//4.79823e-170
Niben101Scf01025g05001	60.7378	29.1677	1.0582	0.00091368	0.018441	-//-
Niben101Scf01027g00003	5.4269	24.4187	-2.1698	4.0789e-05	0.0016532	-//-
Niben101Scf01027g01010	250.565	119.836	1.0641	1.7081e-06	0.00012575	sp|Q9SZ67|WRK19_ARATH Probable WRKY transcription factor 19 OS=Arabidopsis thaliana GN=WRKY19 PE=2 SV=1//1.50888e-50
Niben101Scf01028g03013	60.84	108.129	-0.82966	0.0005265	0.01215	-//-
Niben101Scf01035g04005	165.172	106.896	0.62776	0.0023347	0.036905	sp|Q9SK03|RAP27_ARATH Ethylene-responsive transcription factor RAP2-7 OS=Arabidopsis thaliana GN=RAP2-7 PE=2 SV=2//3.95035e-78
Niben101Scf01036g04001	22.9264	7.09784	1.6916	0.0010493	0.020532	-//-
Niben101Scf01036g05013	153.329	306.104	-0.9974	1.117e-07	1.2356e-05	-//-
Niben101Scf01037g02015	191.675	107.527	0.83396	6.7042e-05	0.0024657	-//-
Niben101Scf01037g09012	278.704	394.571	-0.50155	0.0034632	0.049016	sp|F4IFC5|SYTM2_ARATH Threonine--tRNA ligase, chloroplastic/mitochondrial 2 OS=Arabidopsis thaliana GN=EMB2761 PE=2 SV=1//0
Niben101Scf01041g04001	1025.67	269.937	1.9259	5.5235e-31	2.7561e-27	-//-
Niben101Scf01048g00005	6486.42	10502.5	-0.69524	1.6351e-06	0.00012157	-//-
Niben101Scf01051g05008	65.2119	3.29798	4.3055	8.3476e-09	1.2794e-06	-//-
Niben101Scf01052g06012	142.776	266.92	-0.90265	1.4836e-06	0.00011179	sp|Q5ZMT7|ADCK1_CHICK Uncharacterized aarF domain-containing protein kinase 1 OS=Gallus gallus GN=ADCK1 PE=2 SV=1//4.92601e-41
Niben101Scf01054g03001	5851.83	3803.28	0.62164	0.00024663	0.0068581	-//-
Niben101Scf01054g13006	425.165	270.525	0.65226	0.00021628	0.0062261	sp|Q9XHS0|RS12_HORVU 40S ribosomal protein S12 OS=Hordeum vulgare GN=RPS12 PE=2 SV=1//1.03217e-63
Niben101Scf01054g13007	161.154	257.463	-0.67592	0.00035093	0.0088658	sp|Q9S9P3|FDM1_ARATH Factor of DNA methylation 1 OS=Arabidopsis thaliana GN=FDM1 PE=1 SV=1//0
Niben101Scf01055g01010	359.655	249.594	0.52703	0.0033183	0.04761	-//-
Niben101Scf01056g04002	172.657	258.462	-0.58204	0.0023725	0.037302	-//-
Niben101Scf01061g00001	812.806	548.668	0.56698	0.00057568	0.013073	-//-
Niben101Scf01061g08014	54.0293	109.505	-1.0192	3.5393e-05	0.0014676	-//-
Niben101Scf01063g01004	567.015	1081.87	-0.93207	2.9116e-09	5.1076e-07	-//-
Niben101Scf01063g02002	27.3639	88.58	-1.6947	2.0434e-09	3.7621e-07	-//-
Niben101Scf01063g05019	83.4755	35.0932	1.2502	0.0014677	0.026217	sp|Q6NVR9|ATAD3_XENTR ATPase family AAA domain-containing protein 3 OS=Xenopus tropicalis GN=atad3 PE=2 SV=1//5.90476e-105
Niben101Scf01063g05023	128.287	267.623	-1.0608	0.0004182	0.010146	-//-
Niben101Scf01063g08022	245.111	373.693	-0.60842	0.00036906	0.0092178	-//-
Niben101Scf01063g09017	528.696	1217.22	-1.2031	8.8817e-12	2.8903e-09	-//-
Niben101Scf01063g10013	3644.51	1984.69	0.87681	4.1446e-09	7.0237e-07	-//-
Niben101Scf01063g11008	257.029	369.742	-0.52459	0.0024322	0.038097	-//-
Niben101Scf01063g11028	7.60314	32.9957	-2.1176	3.1538e-06	0.00020475	-//-
Niben101Scf01064g05002	14.7405	33.8521	-1.1995	0.0023425	0.036966	-//-
Niben101Scf01066g05008	3057.47	1828.52	0.74166	4.7214e-07	4.2921e-05	-//-
Niben101Scf01070g04010	83.2629	11.5378	2.8513	0.0003806	0.0094483	-//-
Niben101Scf01072g03005	856.913	589.438	0.53981	0.00093566	0.018775	sp|Q8LB10|CLPR4_ARATH ATP-dependent Clp protease proteolytic subunit-related protein 4, chloroplastic OS=Arabidopsis thaliana GN=CLPR4 PE=1 SV=1//9.646e-121
Niben101Scf01073g07006	151.927	70.022	1.1175	5.5198e-07	4.9352e-05	-//-
Niben101Scf01076g00005	467.529	833.435	-0.83401	4.2561e-05	0.001705	-//-
Niben101Scf01077g04011	33.8643	12.9792	1.3836	0.00090636	0.018335	-//-
Niben101Scf01077g04012	537.366	838.883	-0.64256	7.434e-05	0.0026729	sp|O04973|LEU1A_SOLPN 2-isopropylmalate synthase A OS=Solanum pennellii GN=IPMSA PE=2 SV=1//0
Niben101Scf01078g00006	509.6	942.273	-0.88678	1.8469e-08	2.5442e-06	-//-
Niben101Scf01078g00022	371.031	539.621	-0.54041	0.0012036	0.022749	-//-
Niben101Scf01078g00024	5.84279	20.0207	-1.7768	0.00084693	0.017471	-//-
Niben101Scf01084g03003	97.5794	1.43181	6.0907	0.0012854	0.023863	-//-
Niben101Scf01084g03004	1179.31	319.612	1.8836	0.00019618	0.0057885	sp|P23137|GRP1_TOBAC Glycine-rich protein OS=Nicotiana tabacum GN=GRP PE=2 SV=1//2.09834e-09
Niben101Scf01084g05013	4102.07	454.644	3.1735	7.9429e-07	6.6923e-05	-//-
Niben101Scf01084g06002	137.845	0.350377	8.6199	0.00022145	0.0063315	-//-
Niben101Scf01085g02008	171.529	256.025	-0.57783	0.0021717	0.035094	-//-
Niben101Scf01085g04007	72.2389	147.459	-1.0295	2.8379e-06	0.00018853	sp|Q42797|TCMO_SOYBN Trans-cinnamate 4-monooxygenase OS=Glycine max GN=CYP73A11 PE=2 SV=1//0
Niben101Scf01085g06006	107.248	252.521	-1.2355	2.1915e-10	5.1527e-08	-//-
Niben101Scf01090g05027	59.6583	31.542	0.91945	0.0027409	0.04164	sp|Q8L4E7|BP73_ORYSJ SAP-like protein BP-73 OS=Oryza sativa subsp. japonica GN=BP-73 PE=1 SV=1//1.55583e-40
Niben101Scf01091g00041	529.99	301.856	0.8121	0.0016287	0.028426	sp|Q07511|FDH_SOLTU Formate dehydrogenase, mitochondrial OS=Solanum tuberosum GN=FDH1 PE=1 SV=2//1.57492e-90
Niben101Scf01094g01011	298.337	149.228	0.99942	1.9508e-07	1.9956e-05	sp|P68428|H32_WHEAT Histone H3.2 OS=Triticum aestivum PE=1 SV=2//3.59241e-72
Niben101Scf01100g06016	202.614	303.826	-0.58452	0.0011901	0.02255	-//-
Niben101Scf01101g04010	80.529	207.01	-1.3621	7.714e-11	2.062e-08	-//-
Niben101Scf01102g02004	215.782	129.194	0.74003	0.0034344	0.048758	-//-
Niben101Scf01102g03001	51.1024	87.2444	-0.77167	0.0032044	0.046721	-//-
Niben101Scf01102g03004	225.705	331.277	-0.5536	0.0023224	0.03676	-//-
Niben101Scf01109g04021	221.872	108.319	1.0344	0.00039284	0.009672	-//-
Niben101Scf01111g06004	38.0335	67.6156	-0.83008	0.003192	0.046571	-//-
Niben101Scf01124g08008	26.8119	142.986	-2.4149	1.4318e-06	0.00010806	sp|Q8VZR7|PTR30_ARATH Protein NRT1/ PTR FAMILY 5.1 OS=Arabidopsis thaliana GN=NPF5.1 PE=2 SV=2//0
Niben101Scf01124g12003	50.8414	86.4591	-0.76601	0.0034559	0.048943	-//-
Niben101Scf01124g22007	695.589	1135.43	-0.70693	0.00088864	0.018057	sp|F4J3G5|CTPA3_ARATH Carboxyl-terminal-processing peptidase 3, chloroplastic OS=Arabidopsis thaliana GN=CTPA3 PE=3 SV=1//0
Niben101Scf01133g11002	57.8594	8.21914	2.8155	5.69e-05	0.0021663	-//-
Niben101Scf01142g02005	1118.28	2051.7	-0.87554	8.9038e-06	0.00048002	-//-
Niben101Scf01143g00002	530.501	863.706	-0.70319	8.6411e-06	0.00046923	-//-
Niben101Scf01143g09016	304.059	505.186	-0.73246	1.3614e-05	0.000671	-//-
Niben101Scf01146g01002	66.7104	107.942	-0.69428	0.0033834	0.048204	-//-
Niben101Scf01146g06012	375.636	240.445	0.64363	0.00025604	0.0070584	-//-
Niben101Scf01146g12006	200.379	63.9049	1.6487	0.00045808	0.010833	-//-
Niben101Scf01146g13004	399.266	272.292	0.5522	0.0015745	0.027682	sp|Q9LIR4|ILVD_ARATH Dihydroxy-acid dehydratase, chloroplastic OS=Arabidopsis thaliana GN=DHAD PE=2 SV=1//5.38372e-65
Niben101Scf01146g13015	41.8555	78.8063	-0.91289	0.00066634	0.014498	-//-
Niben101Scf01148g02008	1437.51	988.617	0.54009	0.00051311	0.011878	sp|Q6UNT2|RL5_CUCSA 60S ribosomal protein L5 OS=Cucumis sativus GN=RPL5 PE=2 SV=1//8.11418e-157
Niben101Scf01150g05007	135.748	227.592	-0.74552	0.00013739	0.0043792	-//-
Niben101Scf01154g14007	114.528	179.526	-0.64849	0.0017673	0.030131	-//-
Niben101Scf01154g18013	166.601	274.959	-0.72282	0.0029081	0.043363	-//-
Niben101Scf01154g19024	92.1022	188.765	-1.0353	5.5808e-05	0.0021348	-//-
Niben101Scf01155g01009	804.96	1168.5	-0.53767	0.00041802	0.010146	-//-
Niben101Scf01166g09006	530.515	336.024	0.65883	0.00010714	0.0036121	-//-
Niben101Scf01167g05010	764.993	1223.42	-0.67741	1.0591e-05	0.00055174	-//-
Niben101Scf01169g04004	101.228	189.286	-0.90296	1.5175e-05	0.00073357	-//-
Niben101Scf01169g04010	173.989	301.433	-0.79284	1.1584e-05	0.00059047	-//-
Niben101Scf01171g03019	785.022	428.529	0.87334	0.00018317	0.005484	-//-
Niben101Scf01171g04001	86.0061	175.116	-1.0258	1.5393e-06	0.0001156	-//-
Niben101Scf01171g06004	757.529	469.069	0.6915	2.6359e-05	0.001156	sp|Q9FKC0|R13A4_ARATH 60S ribosomal protein L13a-4 OS=Arabidopsis thaliana GN=RPL13AD PE=2 SV=1//4.92481e-132
Niben101Scf01172g01003	67.6958	130.056	-0.942	2.775e-05	0.0012064	-//-
Niben101Scf01175g05011	185.787	380.314	-1.0335	1.1574e-08	1.693e-06	-//-
Niben101Scf01181g00019	605.107	361.476	0.74329	0.0003059	0.0080667	sp|P49026|GBLP_TOBAC Guanine nucleotide-binding protein subunit beta-like protein OS=Nicotiana tabacum GN=ARCA PE=2 SV=1//0
Niben101Scf01181g01007	587.916	339.903	0.79049	0.00024163	0.0067356	-//-
Niben101Scf01182g01002	242.013	160.275	0.59454	0.0023533	0.037095	sp|Q285L8|RS3A_TOBAC 40S ribosomal protein S3a OS=Nicotiana tabacum GN=cyc07 PE=2 SV=1//3.09463e-156
Niben101Scf01184g01009	61.7422	147.855	-1.2599	0.00048997	0.01143	-//-
Niben101Scf01184g16001	22.4358	5.19446	2.1108	0.00013292	0.004279	sp|Q9C9H5|GUN9_ARATH Endoglucanase 9 OS=Arabidopsis thaliana GN=CEL3 PE=1 SV=1//0
Niben101Scf01185g02002	456.067	306.291	0.57434	0.0010095	0.019944	-//-
Niben101Scf01188g08018	166.016	106.692	0.63786	0.0021408	0.034722	sp|Q9LY87|RGLG2_ARATH E3 ubiquitin-protein ligase RGLG2 OS=Arabidopsis thaliana GN=RGLG2 PE=1 SV=1//2.83371e-112
Niben101Scf01190g00012	133.473	47.2259	1.4989	2.8964e-08	3.7377e-06	-//-
Niben101Scf01192g00009	51.252	131.831	-1.363	1.1365e-08	1.6679e-06	sp|Q93Y06|Y5720_ARATH Probable inactive receptor kinase At5g67200 OS=Arabidopsis thaliana GN=At5g67200 PE=1 SV=1//0
Niben101Scf01192g08003	120.508	264.802	-1.1358	4.1748e-09	7.0481e-07	-//-
Niben101Scf01196g00003	50.5958	23.5521	1.1032	0.0023628	0.037196	sp|Q9ZU95|NUD17_ARATH Nudix hydrolase 17, mitochondrial OS=Arabidopsis thaliana GN=NUDT17 PE=2 SV=1//1.07006e-72
Niben101Scf01200g02006	42.8101	88.2307	-1.0433	6.7095e-05	0.0024657	-//-
Niben101Scf01202g01009	27.5739	88.6618	-1.685	2.9828e-08	3.8054e-06	-//-
Niben101Scf01205g03001	98.6511	177.478	-0.84723	5.9361e-05	0.0022345	-//-
Niben101Scf01208g02001	3.94708	19.5773	-2.3103	5.8871e-05	0.0022254	-//-
Niben101Scf01209g00012	206.605	351.226	-0.76553	2.0367e-05	0.00093811	sp|Q9SZ52|PP344_ARATH Pentatricopeptide repeat-containing protein At4g31850, chloroplastic OS=Arabidopsis thaliana GN=PGR3 PE=1 SV=1//2.57597e-14
Niben101Scf01211g04003	967.754	1513.49	-0.64517	1.845e-05	0.00085595	-//-
Niben101Scf01212g02005	139.001	272.38	-0.97053	0.0021577	0.034919	sp|Q9FJ41|GDL85_ARATH GDSL esterase/lipase At5g45950 OS=Arabidopsis thaliana GN=At5g45950 PE=2 SV=1//7.83493e-69
Niben101Scf01212g03005	11.2931	1.52749	2.8862	0.0010663	0.020774	-//-
Niben101Scf01212t01014	0.25193	9.1815	-5.1876	7.0981e-05	0.0025769	-//-
Niben101Scf01218g01007	328.661	490.4	-0.57736	0.00061014	0.013683	sp|Q8LF20|CAP2_ARATH Putative clathrin assembly protein At2g25430 OS=Arabidopsis thaliana GN=At2g25430 PE=1 SV=2//0
Niben101Scf01218g01026	60.6198	21.6907	1.4827	5.749e-06	0.00033565	-//-
Niben101Scf01220g03014	2556.26	1707.65	0.58202	0.0002812	0.0075844	sp|Q8LB81|GDL79_ARATH GDSL esterase/lipase At5g33370 OS=Arabidopsis thaliana GN=At5g33370 PE=2 SV=1//2.60785e-180
Niben101Scf01221g00001	74.4601	34.0601	1.1284	9.3769e-05	0.0032342	-//-
Niben101Scf01221g20002	19.936	42.1643	-1.0806	0.0019712	0.032604	-//-
Niben101Scf01230g01011	20.8577	0.350377	5.8955	1.0053e-05	0.00052927	-//-
Niben101Scf01232g02002	50.5298	24.9089	1.0205	0.001319	0.024276	-//-
Niben101Scf01236g00013	103.538	56.7062	0.86858	0.00099264	0.01969	sp|Q8RWC9|CIPK1_ARATH CBL-interacting serine/threonine-protein kinase 1 OS=Arabidopsis thaliana GN=CIPK1 PE=1 SV=2//2.37684e-171
Niben101Scf01236g00014	156.092	238.332	-0.61058	0.0018679	0.031358	-//-
Niben101Scf01236g05019	65.0062	35.5992	0.86873	0.002584	0.039775	-//-
Niben101Scf01237g03001	82.8806	43.7248	0.92258	0.00063749	0.014076	-//-
Niben101Scf01237g13026	56.5798	11.3794	2.3139	1.0818e-09	2.1592e-07	-//-
Niben101Scf01238g01006	44.3247	14.9363	1.5693	2.7292e-05	0.0011908	-//-
Niben101Scf01239g02002	369.084	238.837	0.62792	0.00041932	0.010168	sp|Q9FQY8|COMT1_CAPAN Caffeic acid 3-O-methyltransferase OS=Capsicum annuum GN=COMT PE=2 SV=2//0
Niben101Scf01240g10017	21.094	0	Inf	0.0014515	0.026011	-//-
Niben101Scf01240g10022	457.863	16.9786	4.7531	3.9521e-05	0.001612	-//-
Niben101Scf01240g10024	188.342	14.6471	3.6847	1.6136e-07	1.6931e-05	-//-
Niben101Scf01241g08005	390.396	608.849	-0.64115	8.7877e-05	0.0030568	-//-
Niben101Scf01249g01002	27.5064	86.9192	-1.6599	0.00032074	0.0083123	-//-
Niben101Scf01249g06002	206.525	125.24	0.72162	0.00033119	0.0084868	sp|Q285L8|RS3A_TOBAC 40S ribosomal protein S3a OS=Nicotiana tabacum GN=cyc07 PE=2 SV=1//1.48178e-167
Niben101Scf01249g06003	358.278	241.489	0.56912	0.0019404	0.03219	sp|Q285L8|RS3A_TOBAC 40S ribosomal protein S3a OS=Nicotiana tabacum GN=cyc07 PE=2 SV=1//9.45233e-157
Niben101Scf01250g01002	125.93	66.397	0.92343	8.4397e-05	0.0029564	sp|P46287|RL11_MEDSA 60S ribosomal protein L11 OS=Medicago sativa GN=RPL11 PE=2 SV=1//4.33812e-25
Niben101Scf01256g00011	26.6306	8.19096	1.701	0.00036109	0.0090742	-//-
Niben101Scf01259g05006	157.498	305.717	-0.95687	1.3897e-07	1.4931e-05	-//-
Niben101Scf01267g00002	6.02288	0	Inf	0.0031074	0.045633	-//-
Niben101Scf01269g05002	110.452	214.306	-0.95625	2.2994e-06	0.00015935	-//-
Niben101Scf01269g12011	57.2988	94.2396	-0.71783	0.0028804	0.043075	sp|Q39108|GGR_ARATH Heterodimeric geranylgeranyl pyrophosphate synthase small subunit, chloroplastic OS=Arabidopsis thaliana GN=GGR PE=1 SV=2//2.0734e-26
Niben101Scf01272g01024	109.1	65.246	0.7417	0.0019927	0.032828	-//-
Niben101Scf01276g05011	173.523	411.436	-1.2455	0.0025778	0.039743	sp|H2DH18|C7A12_PANGI Cytochrome P450 CYP736A12 OS=Panax ginseng PE=2 SV=1//3.3646e-166
Niben101Scf01276g05013	5.16275	20.4577	-1.9864	0.00023196	0.0065845	-//-
Niben101Scf01278g09008	106.967	56.3792	0.92393	0.0012913	0.023952	-//-
Niben101Scf01278g10002	37.9282	16.4287	1.2071	0.0020422	0.033496	-//-
Niben101Scf01281g08031	12.2027	35.8182	-1.5535	0.00094647	0.018938	-//-
Niben101Scf01281g10010	175.662	263.195	-0.58333	0.0016589	0.02883	-//-
Niben101Scf01283g01002	158.106	242.736	-0.6185	0.0014292	0.025693	-//-
Niben101Scf01283g01015	310.297	460.722	-0.57025	0.00063379	0.014035	-//-
Niben101Scf01283g02004	120.445	75.4408	0.67495	0.0035511	0.049944	-//-
Niben101Scf01284g02011	614.928	891.186	-0.53531	0.0006509	0.014287	-//-
Niben101Scf01285g04011	512.348	315.907	0.69762	5.5187e-05	0.0021182	sp|P41098|RL34_TOBAC 60S ribosomal protein L34 OS=Nicotiana tabacum GN=RPL34 PE=2 SV=1//6.99457e-60
Niben101Scf01289g09008	158.18	347.291	-1.1346	6.6082e-10	1.4336e-07	-//-
Niben101Scf01290g01025	120.114	242.617	-1.0143	2.4258e-07	2.4101e-05	-//-
Niben101Scf01291g00001	128.551	79.2205	0.6984	0.0027656	0.041888	-//-
Niben101Scf01292g01009	16.7755	3.72065	2.1727	0.00088412	0.017982	-//-
Niben101Scf01297g04007	270.595	439.327	-0.69916	5.5524e-05	0.0021278	-//-
Niben101Scf01300g04001	92.0067	189.175	-1.0399	7.1235e-07	6.1402e-05	-//-
Niben101Scf01304g13012	229.655	145.571	0.65775	0.0010009	0.019818	-//-
Niben101Scf01307g01012	185.112	94.8021	0.96541	3.9e-06	0.00024529	-//-
Niben101Scf01318g01008	197.649	291.288	-0.5595	0.0020264	0.033285	-//-
Niben101Scf01322g00001	81.381	149.794	-0.88021	0.0012383	0.02318	-//-
Niben101Scf01326g01018	25.9609	57.9499	-1.1585	0.0029538	0.04388	-//-
Niben101Scf01326g08017	162.14	237.725	-0.55206	0.0031025	0.045606	-//-
Niben101Scf01326g08021	574.265	889.78	-0.63173	6.5992e-05	0.0024316	-//-
Niben101Scf01326g10014	246.179	519.153	-1.0765	7.5843e-05	0.0027112	-//-
Niben101Scf01328g01012	8576.04	12028.5	-0.48807	0.0010129	0.019967	-//-
Niben101Scf01329g00002	3388.12	8077.7	-1.2535	2.7367e-14	1.7069e-11	-//-
Niben101Scf01330g02004	310.928	68.4582	2.1833	2.9112e-09	5.1076e-07	-//-
Niben101Scf01330g02010	313.586	161.821	0.95447	2.5185e-07	2.4869e-05	-//-
Niben101Scf01337g01002	233.893	363.72	-0.63698	0.00022553	0.0064195	-//-
Niben101Scf01338g02001	4.37103	17.6478	-2.0134	0.00081003	0.016896	-//-
Niben101Scf01338g03019	405.631	669.948	-0.72388	9.4757e-06	0.00050299	-//-
Niben101Scf01339g02017	347.935	215.002	0.69447	0.00013872	0.0044136	sp|P34788|RS18_ARATH 40S ribosomal protein S18 OS=Arabidopsis thaliana GN=RPS18A PE=1 SV=1//2.70668e-87
Niben101Scf01339g06010	739.263	439.189	0.75125	4.8645e-06	0.00029169	-//-
Niben101Scf01341g03006	132.972	419.632	-1.658	1.9355e-09	3.5917e-07	-//-
Niben101Scf01341g03007	158.606	79.3247	0.99961	7.7773e-06	0.00042645	-//-
Niben101Scf01349g04004	885.768	610.66	0.53656	0.00087118	0.017807	-//-
Niben101Scf01358g00001	65.9035	35.602	0.8884	0.0029335	0.043679	-//-
Niben101Scf01371g01008	282.517	408.242	-0.53108	0.0022412	0.035895	-//-
Niben101Scf01371g03013	50.5599	21.0112	1.2668	0.0002028	0.0059332	-//-
Niben101Scf01372g09016	183.409	99.6021	0.88082	2.2371e-05	0.0010158	sp|O65759|H2AX_CICAR Histone H2AX OS=Cicer arietinum GN=HIS2A PE=2 SV=1//2.07753e-53
Niben101Scf01372g11012	959.696	2187.7	-1.1888	6.5623e-06	0.00037446	-//-
Niben101Scf01374g03036	717.123	426.104	0.75101	0.00016908	0.0051549	-//-
Niben101Scf01374g03037	104.905	176.377	-0.74958	0.00036782	0.0091992	-//-
Niben101Scf01374g10019	41.6752	18.2949	1.1877	0.0011159	0.021493	-//-
Niben101Scf01375g06006	369.314	257.322	0.52127	0.003008	0.0445	-//-
Niben101Scf01375g08013	180.862	112.394	0.68633	0.00085153	0.017509	-//-
Niben101Scf01383g05022	97.9898	46.3667	1.0795	2.8015e-05	0.0012144	-//-
Niben101Scf01383g09009	125.305	229.372	-0.87225	8.1195e-06	0.00044359	-//-
Niben101Scf01386g02004	857.976	2053.19	-1.2589	6.2856e-08	7.3509e-06	sp|O78328|DXS_CAPAN Probable 1-deoxy-D-xylulose-5-phosphate synthase, chloroplastic OS=Capsicum annuum GN=TKT2 PE=2 SV=1//0
Niben101Scf01391g04001	82.8664	145.569	-0.81284	0.00017585	0.0053144	-//-
Niben101Scf01392g00014	97.4601	154.258	-0.66246	0.0022218	0.035741	-//-
Niben101Scf01396g07008	1507.62	918.804	0.71444	0.00032351	0.0083587	-//-
Niben101Scf01397g00020	41.4963	16.3378	1.3448	0.00047089	0.011072	-//-
Niben101Scf01397g00021	68.5611	26.026	1.3974	5.4061e-06	0.00031861	-//-
Niben101Scf01399g00012	5221.41	7259.31	-0.47539	0.00084525	0.017447	sp|P29790|ATPG_TOBAC ATP synthase gamma chain, chloroplastic OS=Nicotiana tabacum GN=ATPC PE=1 SV=1//4.18229e-171
Niben101Scf01399g00018	13.1725	2.9779	2.1452	0.0030176	0.044591	-//-
Niben101Scf01406g03019	2165.28	2927.8	-0.43526	0.00236	0.037185	sp|P46275|F16P1_PEA Fructose-1,6-bisphosphatase, chloroplastic OS=Pisum sativum GN=FBP PE=1 SV=2//0
Niben101Scf01409g12028	114.485	70.6339	0.69673	0.0025779	0.039743	-//-
Niben101Scf01412g00017	215.571	351.699	-0.70618	8.1604e-05	0.0028742	-//-
Niben101Scf01413g00003	197.165	95.5953	1.0444	6.1771e-06	0.00035645	-//-
Niben101Scf01413g02004	27.4326	5.59374	2.294	0.00069802	0.015091	-//-
Niben101Scf01414g01005	393.078	612.582	-0.64009	0.00010004	0.0034086	-//-
Niben101Scf01414g02022	157.995	279.656	-0.82378	1.7103e-05	0.00080657	-//-
Niben101Scf01415g03009	915.875	443.048	1.0477	0.00033129	0.0084868	sp|P93051|ERDL7_ARATH Sugar transporter ERD6-like 7 OS=Arabidopsis thaliana GN=At2g48020 PE=2 SV=2//0
Niben101Scf01429g00010	68.0113	28.3196	1.264	0.00038823	0.0095953	sp|Q8LFJ8|RFA2B_ARATH Replication protein A 32 kDa subunit B OS=Arabidopsis thaliana GN=RPA2B PE=2 SV=1//2.90112e-72
Niben101Scf01430g01004	1015.39	546.694	0.89322	2.4366e-08	3.2183e-06	sp|Q9LUQ6|RL192_ARATH 60S ribosomal protein L19-2 OS=Arabidopsis thaliana GN=RPL19B PE=2 SV=1//1.15846e-104
Niben101Scf01432g06023	72.2943	30.7366	1.2339	0.00024023	0.0067109	-//-
Niben101Scf01433g08025	763.142	1467.57	-0.9434	7.2159e-10	1.5431e-07	-//-
Niben101Scf01433g08029	3322.8	5374.02	-0.6936	1.8315e-06	0.00013266	-//-
Niben101Scf01438g04009	111.859	41.2467	1.4393	0.00041763	0.010146	-//-
Niben101Scf01444g02009	945.036	626.589	0.59285	0.0002456	0.0068377	sp|Q07761|RL23A_TOBAC 60S ribosomal protein L23a OS=Nicotiana tabacum GN=RPL23A PE=2 SV=1//1.2419e-75
Niben101Scf01451g04009	71.3957	116.874	-0.71105	0.0020886	0.03407	-//-
Niben101Scf01451g04016	163.297	252.694	-0.62989	0.00091164	0.018417	-//-
Niben101Scf01453g02010	1277.07	922.393	0.46938	0.0019185	0.031933	-//-
Niben101Scf01453g06001	145.522	230.685	-0.66469	0.00065716	0.014389	-//-
Niben101Scf01455g00005	169.282	100.806	0.74785	0.00041582	0.010127	-//-
Niben101Scf01460g04025	129.272	204.081	-0.65873	0.00079169	0.016614	-//-
Niben101Scf01463g01012	17.7503	42.3116	-1.2532	0.00066066	0.014417	-//-
Niben101Scf01463g04006	240.419	494.302	-1.0398	1.7825e-09	3.3353e-07	-//-
Niben101Scf01469g05005	98.6986	30.6292	1.6881	4.4743e-05	0.001775	-//-
Niben101Scf01472g02001	695.431	3305.48	-2.2489	4.3696e-30	1.9623e-26	-//-
Niben101Scf01478g00014	48.7431	0	Inf	1.3701e-13	7.5963e-11	sp|P52855|RLA1_MAIZE 60S acidic ribosomal protein P1 OS=Zea mays GN=RPP1A PE=1 SV=1//6.32039e-12
Niben101Scf01478g08021	154.103	240.455	-0.64187	0.00086851	0.017777	-//-
Niben101Scf01482g01007	149.683	59.472	1.3316	9.8502e-09	1.4811e-06	-//-
Niben101Scf01494g05019	319.841	215.794	0.5677	0.0019047	0.031774	sp|P40761|YUXK_BACSU Uncharacterized protein YuxK OS=Bacillus subtilis (strain 168) GN=yuxK PE=3 SV=1//4.43264e-07
Niben101Scf01494g15009	35.3912	16.2043	1.127	0.0034361	0.048758	sp|Q8YRI1|YY46_NOSS1 Uncharacterized WD repeat-containing protein alr3466 OS=Nostoc sp. (strain PCC 7120 / UTEX 2576) GN=alr3466 PE=3 SV=1//5.25654e-07
Niben101Scf01497g03008	1105.97	2056.81	-0.8951	1.9225e-09	3.5823e-07	-//-
Niben101Scf01500g00011	18.7746	54.8544	-1.5468	1.9147e-06	0.0001378	-//-
Niben101Scf01500g01020	65.3009	34.4752	0.92154	0.0010677	0.020783	sp|Q05466|HAT4_ARATH Homeobox-leucine zipper protein HAT4 OS=Arabidopsis thaliana GN=HAT4 PE=1 SV=1//6.65675e-91
Niben101Scf01502g02018	17.6562	5.09186	1.7939	0.00306	0.045157	sp|Q38908|XTH30_ARATH Probable xyloglucan endotransglucosylase/hydrolase protein 30 OS=Arabidopsis thaliana GN=XTH30 PE=2 SV=2//5.51676e-135
Niben101Scf01505g00011	216.199	338.8	-0.64807	0.00030727	0.0080836	sp|P48980|BGAL_SOLLC Beta-galactosidase OS=Solanum lycopersicum PE=1 SV=1//0
Niben101Scf01505g02004	521.179	985.215	-0.91866	6.4114e-09	1.0174e-06	sp|Q9S746|HTH_ARATH Protein HOTHEAD OS=Arabidopsis thaliana GN=HTH PE=1 SV=1//0
Niben101Scf01506g03004	86.0727	28.0973	1.6151	2.1455e-08	2.9109e-06	sp|Q09893|YAI5_SCHPO Uncharacterized protein C24B11.05 OS=Schizosaccharomyces pombe (strain 972 / ATCC 24843) GN=SPAC24B11.05 PE=3 SV=1//5.16695e-14
Niben101Scf01507g01017	187.148	273.465	-0.54718	0.0024826	0.038735	-//-
Niben101Scf01511g02020	551.449	361.323	0.60994	0.00024812	0.0068908	sp|Q46036|BLC_CITFR Outer membrane lipoprotein Blc OS=Citrobacter freundii PE=3 SV=1//2.70915e-19
Niben101Scf01513g00010	175.545	291.501	-0.73166	6.7972e-05	0.0024878	-//-
Niben101Scf01513g01010	770.326	1069.7	-0.47366	0.0021409	0.034722	sp|Q9LSV0|GLYR1_ARATH Glyoxylate/succinic semialdehyde reductase 1 OS=Arabidopsis thaliana GN=GLYR1 PE=1 SV=1//2.4028e-153
Niben101Scf01514g01002	249.799	155.893	0.68021	0.0009063	0.018335	-//-
Niben101Scf01517g07007	173.884	109.502	0.66717	0.0013431	0.024578	-//-
Niben101Scf01517g08001	6216.46	8648.67	-0.47638	0.0030474	0.044987	-//-
Niben101Scf01519g03009	139.427	68.0256	1.0354	7.647e-06	0.00042188	sp|P46291|RL38_SOLLC 60S ribosomal protein L38 OS=Solanum lycopersicum GN=RPL38 PE=3 SV=1//6.77253e-24
Niben101Scf01520g03002	48.4995	191.794	-1.9835	0.00017203	0.0052094	sp|Q9FVN0|AMT13_SOLLC Ammonium transporter 1 member 3 OS=Solanum lycopersicum GN=AMT1-3 PE=2 SV=1//0
Niben101Scf01520g08031	1285.15	1862.91	-0.53563	0.00046042	0.010877	sp|P55243|GLGL3_SOLTU Glucose-1-phosphate adenylyltransferase large subunit 3, chloroplastic/amyloplastic OS=Solanum tuberosum GN=AGPS3 PE=2 SV=1//0
Niben101Scf01521g00004	12.0563	1.05113	3.5198	0.0018549	0.031199	-//-
Niben101Scf01521g04009	7.33997	24.2411	-1.7236	0.0021951	0.035384	-//-
Niben101Scf01521g09001	1540.31	516.629	1.576	5.2728e-05	0.0020381	-//-
Niben101Scf01521g16018	144.687	355.133	-1.2954	9.7273e-13	3.9354e-10	-//-
Niben101Scf01529g03007	589.015	842.639	-0.51661	0.0022252	0.035753	-//-
Niben101Scf01535g00007	17.6725	5.33214	1.7287	0.0029402	0.043722	-//-
Niben101Scf01538g04011	951.687	1356.8	-0.51165	0.00063892	0.014093	-//-
Niben101Scf01539g00001	14.9431	70.6813	-2.2418	4.1101e-06	0.00025636	-//-
Niben101Scf01543g06030	2.76317	108.833	-5.2996	4.2107e-05	0.0016904	-//-
Niben101Scf01553g01001	1417.37	2640.47	-0.89758	1.6542e-09	3.1405e-07	-//-
Niben101Scf01553g02020	61.1178	16.1575	1.9194	2.2191e-08	2.9927e-06	-//-
Niben101Scf01559g01002	35.2642	72.1512	-1.0328	0.00022261	0.0063593	sp|O23038|PME8_ARATH Probable pectinesterase 8 OS=Arabidopsis thaliana GN=PME8 PE=2 SV=2//2.45377e-158
Niben101Scf01568g01024	429.851	295.93	0.53858	0.002228	0.035785	sp|P17093|RS11_SOYBN 40S ribosomal protein S11 OS=Glycine max GN=RPS11 PE=2 SV=2//4.10595e-88
Niben101Scf01571g01004	1168.66	2426.12	-1.0538	0.00044213	0.01053	-//-
Niben101Scf01574g04013	12.5262	1.13512	3.464	0.00011015	0.0036833	-//-
Niben101Scf01578g00012	27.027	62.6577	-1.2131	8.3679e-05	0.0029358	sp|P27057|GAST1_SOLLC Protein GAST1 OS=Solanum lycopersicum GN=GAST1 PE=2 SV=1//3.19262e-26
Niben101Scf01578g05008	35.8675	63.6312	-0.82705	0.0031351	0.045936	sp|Q9FE98|TAR3_ARATH Tryptophan aminotransferase-related protein 3 OS=Arabidopsis thaliana GN=TAR3 PE=3 SV=1//1.04987e-135
Niben101Scf01579g01020	2429.32	1733.8	0.48661	0.0013443	0.024581	sp|Q2HU65|H2A2_MEDTR Probable histone H2A.2 OS=Medicago truncatula GN=MtrDRAFT_AC149210g4v1 PE=3 SV=1//9.59048e-47
Niben101Scf01586g00004	297.516	429.686	-0.53032	0.0021907	0.035324	-//-
Niben101Scf01587g01006	102.426	5.32735	4.265	5.6075e-07	4.9767e-05	sp|Q9LV58|MBF1C_ARATH Multiprotein-bridging factor 1c OS=Arabidopsis thaliana GN=MBF1C PE=1 SV=1//4.3885e-62
Niben101Scf01591g00006	213.203	409.001	-0.93987	5.9445e-08	7.0252e-06	-//-
Niben101Scf01594g02011	14.9996	44.155	-1.5577	0.00012946	0.0042008	sp|Q9SIT6|AB5G_ARATH ABC transporter G family member 5 OS=Arabidopsis thaliana GN=ABCG5 PE=2 SV=1//0
Niben101Scf01594g05015	190.704	101.682	0.90728	8.2893e-05	0.0029123	-//-
Niben101Scf01599g00011	107.254	174.344	-0.7009	0.0007417	0.015793	-//-
Niben101Scf01609g00001	111.375	67.1514	0.72994	0.0022169	0.035697	-//-
Niben101Scf01611g00004	105.163	57.0667	0.8819	0.00042828	0.010302	-//-
Niben101Scf01611g08007	105.982	170.344	-0.68463	0.0010226	0.020141	-//-
Niben101Scf01619g00017	111.494	201.137	-0.85121	3.2978e-05	0.0013947	-//-
Niben101Scf01620g02013	22.2303	53.4268	-1.265	0.0003299	0.008478	-//-
Niben101Scf01623g01025	183.998	411.547	-1.1614	1.4232e-10	3.5566e-08	sp|O81416|GUN17_ARATH Endoglucanase 17 OS=Arabidopsis thaliana GN=At4g02290 PE=2 SV=1//0
Niben101Scf01623g02014	1341.54	931.926	0.52561	0.00075516	0.015997	-//-
Niben101Scf01623g04022	392.305	590.059	-0.58888	0.00029886	0.0079228	-//-
Niben101Scf01623g12020	14.643	45.8367	-1.6463	7.9268e-06	0.00043396	sp|O22264|MYB12_ARATH Transcription factor MYB12 OS=Arabidopsis thaliana GN=MYB12 PE=2 SV=1//1.04694e-68
Niben101Scf01623g15003	96.1054	186.708	-0.95809	3.0082e-06	0.00019722	-//-
Niben101Scf01623g18016	110.92	41.7534	1.4096	0.00073123	0.0156	-//-
Niben101Scf01623g18032	71.1579	121.326	-0.76979	0.0010074	0.019921	-//-
Niben101Scf01625g01009	245.249	148.579	0.72301	0.001293	0.023954	sp|P92963|RAB1C_ARATH Ras-related protein RABB1c OS=Arabidopsis thaliana GN=RABB1C PE=1 SV=1//3.14025e-131
Niben101Scf01628g00003	7.555	0	Inf	0.00023256	0.0065849	-//-
Niben101Scf01628g02006	181.261	279.249	-0.62349	0.00065067	0.014287	-//-
Niben101Scf01628g04009	1174.72	611.009	0.94305	2.4525e-07	2.4313e-05	sp|P42791|RL182_ARATH 60S ribosomal protein L18-2 OS=Arabidopsis thaliana GN=RPL18B PE=1 SV=2//3.04349e-97
Niben101Scf01628g04010	213.579	121.798	0.81028	4.7288e-05	0.0018579	-//-
Niben101Scf01634g06003	170.436	376.361	-1.1429	4.5425e-10	1.0049e-07	-//-
Niben101Scf01634g07031	136.108	267.449	-0.97451	0.00049572	0.011535	-//-
Niben101Scf01635g05017	446.63	283.438	0.65605	0.00012404	0.0040661	sp|Q9FHH8|COL5_ARATH Zinc finger protein CONSTANS-LIKE 5 OS=Arabidopsis thaliana GN=COL5 PE=2 SV=2//5.03497e-84
Niben101Scf01636g01006	123.949	195.478	-0.65725	0.0012203	0.022959	-//-
Niben101Scf01640g02004	145.353	282.899	-0.96073	3.1009e-07	2.9947e-05	-//-
Niben101Scf01646g01008	104.371	242.909	-1.2187	9.4889e-08	1.0734e-05	-//-
Niben101Scf01649g04003	630.298	241.981	1.3811	2.8834e-13	1.3923e-10	-//-
Niben101Scf01653g02013	3990.25	7708.06	-0.94989	2.4302e-08	3.2183e-06	sp|Q40460|RCA1_TOBAC Ribulose bisphosphate carboxylase/oxygenase activase 1, chloroplastic OS=Nicotiana tabacum PE=1 SV=1//0
Niben101Scf01655g04005	27.4583	90.1584	-1.7152	1.2364e-09	2.4353e-07	-//-
Niben101Scf01656g00015	109.509	165.446	-0.59531	0.0031121	0.045672	sp|Q9M2S4|LRKS4_ARATH L-type lectin-domain containing receptor kinase S.4 OS=Arabidopsis thaliana GN=LECRKS4 PE=2 SV=1//4.91617e-50
Niben101Scf01658g01011	193.98	640.586	-1.7235	1.6917e-10	4.1289e-08	sp|P48977|ADH_MALDO Alcohol dehydrogenase OS=Malus domestica GN=ADH PE=2 SV=1//5.96612e-84
Niben101Scf01658g01018	433.6	672.705	-0.63361	0.00011398	0.0037942	-//-
Niben101Scf01658g02008	296.801	188.008	0.6587	0.0011783	0.022376	-//-
Niben101Scf01664g06012	3.01609	15.1373	-2.3274	0.00040157	0.0098437	-//-
Niben101Scf01669g00001	366.21	221.354	0.72632	3.4231e-05	0.0014356	sp|Q9LMR5|FK126_ARATH F-box/kelch-repeat protein At1g15670 OS=Arabidopsis thaliana GN=At1g15670 PE=2 SV=1//4.36268e-64
Niben101Scf01671g06022	21.2047	48.7258	-1.2003	0.00043197	0.010365	-//-
Niben101Scf01673g01007	555.254	393.698	0.49606	0.0026261	0.040319	sp|Q6F2U9|SYK_ORYSJ Lysine--tRNA ligase OS=Oryza sativa subsp. japonica GN=Os03g0586800 PE=2 SV=1//0
Niben101Scf01677g03004	261.197	153.482	0.76707	5.1724e-05	0.0020042	-//-
Niben101Scf01677g04003	143.778	85.6095	0.748	0.00075495	0.015997	-//-
Niben101Scf01681g07003	98.7398	44.1103	1.1625	3.0741e-05	0.001311	sp|F4JKK0|SUD1_ARATH Probable E3 ubiquitin ligase SUD1 OS=Arabidopsis thaliana GN=SUD1 PE=1 SV=1//2.1171e-07
Niben101Scf01681g13001	253.069	480.539	-0.92512	5.7168e-08	6.7739e-06	sp|Q9ZVJ5|SGGP_ARATH Haloacid dehalogenase-like hydrolase domain-containing protein Sgpp OS=Arabidopsis thaliana GN=SGPP PE=1 SV=2//3.28716e-90
Niben101Scf01683g09002	368.236	231.217	0.67138	0.0011181	0.021518	sp|Q9SRE4|UGAL2_ARATH UDP-galactose transporter 2 OS=Arabidopsis thaliana GN=UDP-GALT2 PE=2 SV=1//9.84673e-74
Niben101Scf01687g02010	5.79049	18.6102	-1.6843	0.0025555	0.039526	-//-
Niben101Scf01687g05002	19.8908	61.4131	-1.6264	4.3837e-07	4.0507e-05	sp|Q944R1|PLY15_ARATH Probable pectate lyase 15 OS=Arabidopsis thaliana GN=At4g13710 PE=2 SV=1//0
Niben101Scf01689g04015	430.947	297.866	0.53285	0.0022606	0.036115	-//-
Niben101Scf01689g06004	277.971	164.917	0.7532	6.0567e-05	0.0022723	-//-
Niben101Scf01690g00004	140.787	245.815	-0.80406	2.1827e-05	0.0009941	-//-
Niben101Scf01695g03013	220.407	324.164	-0.55655	0.0022236	0.035741	-//-
Niben101Scf01696g00010	39.1703	71.1352	-0.86081	0.0020134	0.033108	sp|Q9LZP3|PP293_ARATH Pentatricopeptide repeat-containing protein At3g62470, mitochondrial OS=Arabidopsis thaliana GN=At3g62470 PE=2 SV=1//0
Niben101Scf01696g06033	219.477	102.05	1.1048	5.1758e-08	6.1654e-06	sp|Q99090|CPRF2_PETCR Light-inducible protein CPRF2 OS=Petroselinum crispum GN=CPRF2 PE=2 SV=2//1.32603e-130
Niben101Scf01696g06050	1550.64	3355.59	-1.1137	6.0066e-11	1.6448e-08	sp|A2Z7B3|GME1_ORYSI GDP-mannose 3,5-epimerase 1 OS=Oryza sativa subsp. indica GN=OsI_032456 PE=2 SV=1//0
Niben101Scf01697g06007	322.507	162.974	0.98469	1.2627e-07	1.3697e-05	-//-
Niben101Scf01697g23018	952.214	1299.24	-0.44831	0.0032098	0.046756	sp|Q9M4G4|PGMC_SOLTU Phosphoglucomutase, cytoplasmic OS=Solanum tuberosum GN=PGM1 PE=2 SV=1//0
Niben101Scf01701g10015	91.0613	184.167	-1.0161	0.00036027	0.0090626	-//-
Niben101Scf01711g00010	681.075	443.282	0.61959	0.00021002	0.0061012	-//-
Niben101Scf01711g01004	1630.03	1078	0.59653	7.1372e-05	0.002589	-//-
Niben101Scf01716g00010	199.8	402.415	-1.0101	8.1734e-09	1.2614e-06	-//-
Niben101Scf01716g00024	885.227	1318.01	-0.57424	0.00020109	0.0058907	sp|Q9LMM0|GPAT4_ARATH Glycerol-3-phosphate 2-O-acyltransferase 4 OS=Arabidopsis thaliana GN=GPAT4 PE=1 SV=1//0
Niben101Scf01718g01010	1779.69	2700.79	-0.60176	0.0035573	0.049991	-//-
Niben101Scf01718g04003	11.5544	34.8778	-1.5939	7.2507e-05	0.0026196	-//-
Niben101Scf01718g07005	1648.13	1196.78	0.46167	0.0029978	0.044402	-//-
Niben101Scf01718g09027	637.403	13.2387	5.5894	1.7606e-56	2.6355e-52	sp|Q2MHE4|HT1_ARATH Serine/threonine-protein kinase HT1 OS=Arabidopsis thaliana GN=HT1 PE=1 SV=1//7.76114e-76
Niben101Scf01721g07006	244.752	398.683	-0.70392	5.6206e-05	0.0021463	sp|O49931|TIC55_PEA Protein TIC 55, chloroplastic OS=Pisum sativum GN=TIC55 PE=1 SV=1//1.00681e-37
Niben101Scf01722g04010	177.355	307.598	-0.7944	1.3499e-05	0.00066891	-//-
Niben101Scf01723g00007	82.9207	230.582	-1.4755	5.4807e-13	2.413e-10	-//-
Niben101Scf01727g05001	94.8925	149.358	-0.65441	0.0023978	0.037651	-//-
Niben101Scf01731g04005	17.6439	55.856	-1.6625	7.5395e-07	6.4126e-05	-//-
Niben101Scf01731g10001	62.2176	17.6335	1.819	1.1537e-06	9.1053e-05	-//-
Niben101Scf01732g02007	179.645	308.284	-0.77911	1.4756e-05	0.00071793	sp|O64637|C76C2_ARATH Cytochrome P450 76C2 OS=Arabidopsis thaliana GN=CYP76C2 PE=2 SV=1//5.14688e-26
Niben101Scf01732g02009	648.881	1028.59	-0.66464	2.3329e-05	0.001054	-//-
Niben101Scf01735g00005	132.303	540.187	-2.0296	6.9168e-06	0.00038899	-//-
Niben101Scf01739g02012	143.852	227.465	-0.66105	0.00081276	0.016937	-//-
Niben101Scf01740g01003	764.361	1125.58	-0.55834	0.00082067	0.017062	sp|Q8R1R3|STAR7_MOUSE StAR-related lipid transfer protein 7, mitochondrial OS=Mus musculus GN=Stard7 PE=2 SV=2//2.77874e-07
Niben101Scf01740g02002	240.994	369.223	-0.6155	0.00041682	0.010145	-//-
Niben101Scf01740g15006	30.7773	10.9913	1.4855	0.00045186	0.01072	-//-
Niben101Scf01742g01001	35.0316	89.344	-1.3507	0.00016037	0.0049565	-//-
Niben101Scf01749g02007	451.458	771.323	-0.77274	2.1263e-06	0.00014994	-//-
Niben101Scf01750g15002	34.0762	72.9078	-1.0973	0.00011005	0.0036826	-//-
Niben101Scf01752g08008	179.219	55.8296	1.6826	1.2414e-06	9.6454e-05	sp|O64882|BGL17_ARATH Beta-glucosidase 17 OS=Arabidopsis thaliana GN=BGLU17 PE=2 SV=1//2.4935e-46
Niben101Scf01752g08011	28.7079	7.4647	1.9433	0.003013	0.044554	-//-
Niben101Scf01752g10014	39.6731	74.1317	-0.90193	0.001236	0.023157	-//-
Niben101Scf01756g00016	46.2172	81.4497	-0.81748	0.0022689	0.036197	-//-
Niben101Scf01764g00009	807.13	472.233	0.7733	1.4072e-05	0.0006884	-//-
Niben101Scf01764g02024	73.9765	118.881	-0.68437	0.003159	0.046225	-//-
Niben101Scf01764g03022	927.694	1547.21	-0.73795	1.3752e-06	0.00010467	sp|Q9XES0|DXR_MENPI 1-deoxy-D-xylulose 5-phosphate reductoisomerase, chloroplastic OS=Mentha piperita GN=DXR PE=2 SV=2//0
Niben101Scf01773g08011	11.6946	1.83588	2.6713	0.0016114	0.02818	-//-
Niben101Scf01775g00007	161.869	332.308	-1.0377	3.0532e-08	3.8842e-06	-//-
Niben101Scf01775g01019	294.71	435.507	-0.5634	0.00081341	0.016943	-//-
Niben101Scf01777g00016	136.977	290.084	-1.0825	4.3582e-05	0.0017366	-//-
Niben101Scf01779g03010	88.0553	141.535	-0.68468	0.002281	0.036325	-//-
Niben101Scf01779g05002	983.762	612.955	0.68253	2.0742e-05	0.00095437	sp|Q9M3V8|RS6_ASPOF 40S ribosomal protein S6 OS=Asparagus officinalis GN=rps6 PE=2 SV=1//4.16161e-131
Niben101Scf01784g05005	12.3747	29.2049	-1.2388	0.0027665	0.041888	-//-
Niben101Scf01785g01009	189.806	416.208	-1.1328	1.6264e-10	3.9912e-08	sp|P55004|PHYE_IPONI Phytochrome E OS=Ipomoea nil GN=PHYE PE=2 SV=1//0
Niben101Scf01785g10007	824.692	1377.8	-0.74044	9.8016e-07	7.9453e-05	sp|Q0WVX5|SSY4_ARATH Probable starch synthase 4, chloroplastic/amyloplastic OS=Arabidopsis thaliana GN=SS4 PE=2 SV=1//0
Niben101Scf01789g02014	412.891	275.787	0.58221	0.0012137	0.022872	sp|Q5SMI4|RL393_ORYSJ 60S ribosomal protein L39-3 OS=Oryza sativa subsp. japonica GN=RPL39C PE=3 SV=1//6.78756e-25
Niben101Scf01789g02045	267.61	81.6252	1.713	0.0010936	0.021179	-//-
Niben101Scf01791g03001	196.028	128.577	0.60842	0.0023487	0.037049	sp|Q84WV1|TCPG_ARATH T-complex protein 1 subunit gamma OS=Arabidopsis thaliana GN=CCT3 PE=1 SV=1//0
Niben101Scf01795g04036	127.042	62.3515	1.0268	0.00011144	0.0037209	sp|Q38867|CP19C_ARATH Peptidyl-prolyl cis-trans isomerase CYP19-3 OS=Arabidopsis thaliana GN=CYP19-3 PE=2 SV=2//7.2012e-83
Niben101Scf01797g02013	124.826	75.2095	0.73093	0.001583	0.027796	-//-
Niben101Scf01798g08001	531.223	364.639	0.54285	0.0015002	0.026713	-//-
Niben101Scf01802g02001	68.4484	33.1493	1.046	0.00036269	0.0091043	-//-
Niben101Scf01808g00015	372.102	201.012	0.88841	1.344e-06	0.00010319	-//-
Niben101Scf01808g01002	757.779	1375.08	-0.85967	1.702e-08	2.359e-06	-//-
Niben101Scf01814g05011	302.581	455.186	-0.58913	0.00062604	0.013945	-//-
Niben101Scf01817g00019	44.6453	79.0886	-0.82496	0.0019099	0.031848	-//-
Niben101Scf01818g07001	270.645	172.109	0.65308	0.00042136	0.010191	-//-
Niben101Scf01818g07004	605.228	403.444	0.58511	0.00046954	0.011051	-//-
Niben101Scf01818g08020	131.744	49.2489	1.4196	2.4661e-05	0.0011001	-//-
Niben101Scf01818g09008	233.451	143.305	0.70403	0.00021219	0.0061444	-//-
Niben101Scf01822g13004	400.022	649.015	-0.69817	1.038e-05	0.0005414	sp|Q39639|PLSB_CUCSA Glycerol-3-phosphate acyltransferase, chloroplastic OS=Cucumis sativus PE=2 SV=1//0
Niben101Scf01824g00017	48.6375	23.181	1.0691	0.0016853	0.029198	-//-
Niben101Scf01825g04002	19.8981	2.72321	2.8692	0.00066595	0.014497	sp|Q9SIN1|TTL3_ARATH Inactive TPR repeat-containing thioredoxin TTL3 OS=Arabidopsis thaliana GN=TTL3 PE=1 SV=2//1.2752e-24
Niben101Scf01826g05013	235.074	417.777	-0.82962	0.0004104	0.010027	sp|Q9STM6|GDL57_ARATH GDSL esterase/lipase At3g48460 OS=Arabidopsis thaliana GN=At3g48460 PE=2 SV=1//2.17142e-151
Niben101Scf01830g00008	51.1373	120.939	-1.2418	2.5949e-07	2.5555e-05	-//-
Niben101Scf01833g00002	19.5059	1.14203	4.0942	0.00036042	0.0090626	-//-
Niben101Scf01842g06006	266.687	400.61	-0.58705	0.00090218	0.018282	-//-
Niben101Scf01847g00001	133.731	206.336	-0.62566	0.0012018	0.022723	-//-
Niben101Scf01847g03004	2849.02	1545.29	0.88259	8.7514e-07	7.2111e-05	-//-
Niben101Scf01847g05003	66.2967	155.496	-1.2299	3.4205e-08	4.2788e-06	-//-
Niben101Scf01847g07003	286.431	498.34	-0.79894	2.0435e-06	0.00014498	-//-
Niben101Scf01849g03012	360.409	528.459	-0.55215	0.0013367	0.024514	-//-
Niben101Scf01851g03014	427.218	264.455	0.69195	6.9968e-05	0.0025504	-//-
Niben101Scf01856g02002	91.8673	145.411	-0.66252	0.0022683	0.036197	-//-
Niben101Scf01859g00003	1.23205	9.41008	-2.9332	0.0015896	0.027886	-//-
Niben101Scf01859g09002	64.6983	25.7686	1.3281	6.2396e-05	0.0023254	-//-
Niben101Scf01862g02013	22.4832	50.694	-1.173	0.00023564	0.0066345	-//-
Niben101Scf01863g04003	35.9144	13.161	1.4483	0.00030641	0.0080753	-//-
Niben101Scf01870g03002	308.307	515.34	-0.74116	0.0003701	0.0092388	-//-
Niben101Scf01888g09015	68.9653	118.909	-0.78592	0.0033294	0.047693	-//-
Niben101Scf01890g01016	8.12555	0.773049	3.3938	0.0026599	0.040755	-//-
Niben101Scf01894g02004	5665.45	4229.39	0.42174	0.0028451	0.042688	sp|A5JTQ3|XYL2_MEDSV Beta-xylosidase/alpha-L-arabinofuranosidase 2 OS=Medicago sativa subsp. varia GN=Xyl2 PE=2 SV=1//0
Niben101Scf01894g03006	463.668	1172.33	-1.3382	2.0536e-12	7.7498e-10	sp|Q9SZ67|WRK19_ARATH Probable WRKY transcription factor 19 OS=Arabidopsis thaliana GN=WRKY19 PE=2 SV=1//4.89509e-13
Niben101Scf01894g03012	67.7631	146.567	-1.113	1.5212e-05	0.00073404	-//-
Niben101Scf01897g04013	127.256	78.3251	0.70018	0.0023207	0.03676	-//-
Niben101Scf01899g06004	252.64	133.792	0.91709	1.668e-06	0.00012361	sp|Q94KL7|SILD_FORIN Secoisolariciresinol dehydrogenase (Fragment) OS=Forsythia intermedia PE=1 SV=1//1.29376e-81
Niben101Scf01907g00003	461.455	284.732	0.69659	4.805e-05	0.0018796	-//-
Niben101Scf01911g02007	843.417	556.644	0.59949	0.000259	0.0071183	-//-
Niben101Scf01916g00004	52.1389	98.3931	-0.9162	0.0002323	0.0065849	sp|Q33DL3|CFI_TOBAC Chalcone--flavonone isomerase OS=Nicotiana tabacum GN=CHI PE=2 SV=1//4.61719e-115
Niben101Scf01927g09005	679.812	384.406	0.8225	8.5302e-07	7.0809e-05	-//-
Niben101Scf01933g00003	40.9125	111.154	-1.442	7.3668e-09	1.1487e-06	-//-
Niben101Scf01933g01001	64.7724	146.156	-1.1741	3.0376e-07	2.9463e-05	-//-
Niben101Scf01934g02004	153.505	0.700754	7.7752	3.7439e-09	6.3686e-07	sp|P27666|E13F_TOBAC Glucan endo-1,3-beta-glucosidase, basic vacuolar isoform GLB OS=Nicotiana tabacum PE=2 SV=1//0
Niben101Scf01934g04020	1258.32	825.936	0.6074	0.00024507	0.0068274	sp|Q8LGG8|USPAL_ARATH Universal stress protein A-like protein OS=Arabidopsis thaliana GN=At3g01520 PE=1 SV=2//1.63799e-06
Niben101Scf01934g04026	33.3521	9.76045	1.7728	4.199e-05	0.0016882	-//-
Niben101Scf01936g06004	524.338	294.163	0.83388	0.00012578	0.0041111	sp|Q9XEE2|ANXD2_ARATH Annexin D2 OS=Arabidopsis thaliana GN=ANN2 PE=1 SV=1//7.78832e-164
Niben101Scf01938g01003	49.7948	93.0322	-0.90173	0.00031716	0.0082591	-//-
Niben101Scf01941g00002	63.7627	107.153	-0.74889	0.0027808	0.042049	-//-
Niben101Scf01942g04001	13.5515	0.761353	4.1537	0.0028607	0.042856	-//-
Niben101Scf01943g09007	67.3259	37.853	0.83075	0.0033215	0.04761	-//-
Niben101Scf01948g00002	624.954	390.787	0.67737	3.2005e-05	0.0013598	-//-
Niben101Scf01954g01024	150.158	298.178	-0.98969	1.4556e-07	1.5492e-05	-//-
Niben101Scf01956g01003	340.242	220.591	0.62519	0.00063945	0.014098	-//-
Niben101Scf01959g00004	107.364	321.308	-1.5815	1.0278e-16	9.6162e-14	-//-
Niben101Scf01964g09004	112.318	227.461	-1.018	0.0011415	0.021861	-//-
Niben101Scf01966g02001	10.8294	215.637	-4.3156	2.92e-08	3.7466e-06	-//-
Niben101Scf01968g00008	380.283	240.136	0.66322	0.00021017	0.0061012	-//-
Niben101Scf01970g06011	345.572	209.638	0.72108	7.4021e-05	0.0026643	sp|Q9XHS0|RS12_HORVU 40S ribosomal protein S12 OS=Hordeum vulgare GN=RPS12 PE=2 SV=1//2.72636e-60
Niben101Scf01971g01005	354.102	795.638	-1.1679	3.6499e-07	3.4874e-05	sp|P58515|SPI2_SOLTU Serine protease inhibitor 2 OS=Solanum tuberosum PE=1 SV=1//1.94766e-20
Niben101Scf01971g01006	2864.24	6448.06	-1.1707	1.5519e-09	2.9784e-07	sp|O24384|CPI8_SOLTU Cysteine protease inhibitor 8 (Fragment) OS=Solanum tuberosum PE=2 SV=1//1.70573e-19
Niben101Scf01976g00014	45.6085	202.614	-2.1514	3.8233e-13	1.7844e-10	sp|Q5RET6|T184C_PONAB Transmembrane protein 184C OS=Pongo abelii GN=TMEM184C PE=2 SV=1//7.11257e-39
Niben101Scf01977g00001	42.4248	15.5834	1.4449	0.00010827	0.0036421	-//-
Niben101Scf01978g01006	72.6042	31.3071	1.2136	0.00023603	0.0066371	-//-
Niben101Scf01980g02001	89.1083	172.421	-0.95231	7.6946e-06	0.00042333	-//-
Niben101Scf01980g04006	46.2167	16.4404	1.4912	0.0014335	0.025739	-//-
Niben101Scf01980g10004	374.755	696.691	-0.89457	9.9866e-06	0.000527	-//-
Niben101Scf01984g00024	428.907	211.419	1.0206	0.0025727	0.039743	sp|Q9CAL3|CRK2_ARATH Cysteine-rich receptor-like protein kinase 2 OS=Arabidopsis thaliana GN=CRK2 PE=2 SV=1//0
Niben101Scf01986g00011	296.373	184.918	0.68053	0.00060509	0.013614	-//-
Niben101Scf01987g00015	19178	30086	-0.64964	4.0022e-06	0.00025102	-//-
Niben101Scf01987g01006	69.4429	21.3382	1.7024	3.2514e-06	0.00020979	-//-
Niben101Scf01991g01018	85.6969	177.711	-1.0522	6.1797e-07	5.3887e-05	-//-
Niben101Scf01991g03009	411.582	1038.75	-1.3356	0.00028469	0.0076466	-//-
Niben101Scf01991g04010	3592.34	2068.08	0.79663	0.0033401	0.047742	-//-
Niben101Scf01992g01013	62.754	116.237	-0.88929	0.00017774	0.0053562	-//-
Niben101Scf01993g00001	708.335	512.749	0.46618	0.0031174	0.045736	-//-
Niben101Scf01998g06003	38.2016	8.56473	2.1572	0.00012839	0.004172	-//-
Niben101Scf01998g10004	230.891	395.305	-0.77576	0.00063327	0.014035	sp|Q3EBF7|SLD2_ARATH Delta(8)-fatty-acid desaturase 2 OS=Arabidopsis thaliana GN=SLD2 PE=1 SV=1//0
Niben101Scf02000g00005	68.4443	152.105	-1.1521	8.17e-05	0.0028754	sp|Q7X9B9|NLP2_ARATH Protein NLP2 OS=Arabidopsis thaliana GN=NLP2 PE=2 SV=3//0
Niben101Scf02002g04006	93.3552	164.637	-0.81849	0.00023717	0.0066567	-//-
Niben101Scf02003g01002	358.206	228.363	0.64946	0.00025504	0.0070396	sp|O80377|RSSA_DAUCA 40S ribosomal protein SA OS=Daucus carota GN=179B PE=2 SV=1//7.34886e-142
Niben101Scf02006g03001	77.1575	195.599	-1.342	7.5887e-05	0.0027112	-//-
Niben101Scf02006g04006	125.304	76.962	0.70321	0.0029392	0.043722	sp|Q9LUJ5|EBP2_ARATH Probable rRNA-processing protein EBP2 homolog OS=Arabidopsis thaliana GN=At3g22660 PE=2 SV=1//8.45154e-88
Niben101Scf02008g00001	85.1441	141	-0.72772	0.00062779	0.013964	-//-
Niben101Scf02011g08012	112.673	181.505	-0.68788	0.00078824	0.016565	sp|Q8L7I1|Y4193_ARATH Uncharacterized protein At4g10930 OS=Arabidopsis thaliana GN=At4g10930 PE=2 SV=1//6.60753e-27
Niben101Scf02015g01022	94.9082	42.8279	1.148	0.00093999	0.018845	sp|Q8VZT0|NLAL1_ARATH Putative H/ACA ribonucleoprotein complex subunit 1-like protein 1 OS=Arabidopsis thaliana GN=At3g03920 PE=2 SV=1//2.66744e-49
Niben101Scf02023g01002	391.368	641.545	-0.71302	1.4098e-05	0.00068891	-//-
Niben101Scf02026g01002	204.441	768.464	-1.9103	2.2535e-29	9.2001e-26	-//-
Niben101Scf02026g02002	1451.81	2056.51	-0.50235	0.00064435	0.014191	sp|Q8LCA1|CUT1B_ARATH Protein CURVATURE THYLAKOID 1B, chloroplastic OS=Arabidopsis thaliana GN=CURT1B PE=1 SV=2//5.09379e-39
Niben101Scf02026g04007	600.904	845.968	-0.49347	0.001332	0.024465	-//-
Niben101Scf02027g00001	265.956	403.278	-0.60059	0.0020368	0.033419	-//-
Niben101Scf02030g01002	233.672	336.046	-0.52418	0.0026102	0.040116	sp|Q9M7J4|MFP1_TOBAC MAR-binding filament-like protein 1-1 OS=Nicotiana tabacum GN=MFP1-1 PE=2 SV=1//0
Niben101Scf02030g02012	35.8387	14.5088	1.3046	0.0011155	0.021493	-//-
Niben101Scf02030g05008	3.13998	18.0966	-2.5269	6.4377e-05	0.0023853	-//-
Niben101Scf02031g07001	272.494	172.558	0.65914	0.0005022	0.011673	-//-
Niben101Scf02031g08011	100.126	158.95	-0.66676	0.0015313	0.027117	-//-
Niben101Scf02033g00003	39.7313	73.4135	-0.88577	0.0015523	0.027347	-//-
Niben101Scf02034g02001	266.348	452.261	-0.76384	1.4434e-05	0.00070382	-//-
Niben101Scf02041g00002	879.563	25.5427	5.1058	1.936e-07	1.9895e-05	sp|P17514|CHIQ_TOBAC Acidic endochitinase Q OS=Nicotiana tabacum PE=1 SV=1//2.26057e-167
Niben101Scf02041g01013	40.1757	73.4651	-0.87074	0.0031852	0.046487	-//-
Niben101Scf02041g04015	433.621	829.665	-0.93609	2.1335e-06	0.00014994	-//-
Niben101Scf02041g04034	2175.38	1409.28	0.62631	0.0014709	0.026265	-//-
Niben101Scf02041g05002	135.147	203.036	-0.58721	0.0033532	0.047866	-//-
Niben101Scf02046g00002	23.9843	77.7354	-1.6965	1.5598e-08	2.189e-06	sp|Q9LE38|NLP4_ARATH Protein NLP4 OS=Arabidopsis thaliana GN=NLP4 PE=2 SV=1//0
Niben101Scf02051g00001	303.895	719.827	-1.2441	5.9377e-14	3.4186e-11	-//-
Niben101Scf02056g01003	33.3727	70.8136	-1.0854	9.6315e-05	0.0033052	sp|Q8RXE8|BASS3_ARATH Probable sodium/metabolite cotransporter BASS3, chloroplastic OS=Arabidopsis thaliana GN=BASS3 PE=2 SV=1//4.4684e-121
Niben101Scf02059g06011	0.552001	8.9502	-4.0192	0.00038291	0.0094953	-//-
Niben101Scf02062g04009	202.074	310.535	-0.61987	0.00072507	0.015491	-//-
Niben101Scf02069g02008	83.6344	236.074	-1.4971	1.1879e-08	1.7264e-06	-//-
Niben101Scf02072g01011	417.03	230.086	0.85798	1.0282e-06	8.2605e-05	-//-
Niben101Scf02072g01013	54.1538	3.0199	4.1645	0.00058922	0.01333	-//-
Niben101Scf02073g00005	105.659	61.3429	0.78444	0.0016729	0.029051	-//-
Niben101Scf02073g00008	1316.88	859.064	0.61628	8.4058e-05	0.0029468	sp|Q9LZH9|RL7A2_ARATH 60S ribosomal protein L7a-2 OS=Arabidopsis thaliana GN=RPL7AB PE=1 SV=1//3.54169e-148
Niben101Scf02073g04012	907.727	539.724	0.75004	3.8861e-06	0.00024476	sp|O82528|RL15_PETHY 60S ribosomal protein L15 OS=Petunia hybrida GN=RPL15 PE=2 SV=1//5.90071e-117
Niben101Scf02073g08002	47.6541	115.179	-1.2732	0.00017088	0.0051885	sp|Q9SF78|GDL29_ARATH GDSL esterase/lipase At1g71691 OS=Arabidopsis thaliana GN=At1g71691 PE=2 SV=1//1.28916e-158
Niben101Scf02078g04009	546.781	1250.82	-1.1938	2.7991e-14	1.722e-11	sp|Q9S746|HTH_ARATH Protein HOTHEAD OS=Arabidopsis thaliana GN=HTH PE=1 SV=1//0
Niben101Scf02078g04010	130.472	208.011	-0.67292	0.00069965	0.015102	-//-
Niben101Scf02078g06002	153.512	87.0882	0.81781	0.00019989	0.0058671	sp|Q93ZM7|CH60C_ARATH Chaperonin CPN60-like 2, mitochondrial OS=Arabidopsis thaliana GN=At3g13860 PE=2 SV=2//0
Niben101Scf02081g02001	144.172	218.335	-0.59875	0.0023231	0.03676	-//-
Niben101Scf02082g00003	98.8911	158.89	-0.68411	0.00097251	0.01935	-//-
Niben101Scf02082g00005	9.61052	26.2668	-1.4506	0.0028842	0.043118	-//-
Niben101Scf02085g10001	31.2873	73.0578	-1.2235	2.6465e-05	0.0011584	-//-
Niben101Scf02098g01011	279.399	184.847	0.59599	0.0010687	0.020787	-//-
Niben101Scf02098g02013	732.776	459.664	0.67279	4.0827e-05	0.0016532	sp|Q6UNT2|RL5_CUCSA 60S ribosomal protein L5 OS=Cucumis sativus GN=RPL5 PE=2 SV=1//1.00943e-149
Niben101Scf02104g00003	0	27.7947	#NAME?	0.0012653	0.023588	-//-
Niben101Scf02108g02018	284.035	442.018	-0.63804	0.00021586	0.0062219	-//-
Niben101Scf02111g11033	89.8755	50.7344	0.82496	0.0013704	0.024923	-//-
Niben101Scf02114g00010	244.155	164.507	0.56965	0.0035479	0.049931	sp|P49420|DHAS_PROMA Aspartate-semialdehyde dehydrogenase OS=Prochlorococcus marinus (strain SARG / CCMP1375 / SS120) GN=asd PE=3 SV=2//5.86041e-91
Niben101Scf02114g01002	42.2274	109.299	-1.372	2.1327e-06	0.00014994	-//-
Niben101Scf02115g04004	34.0162	0	Inf	0.00013861	0.0044136	-//-
Niben101Scf02117g00006	263.125	510.937	-0.9574	1.0664e-06	8.5058e-05	-//-
Niben101Scf02118g00004	288.388	95.8761	1.5888	9.0811e-16	7.6946e-13	-//-
Niben101Scf02122g00006	70.9186	117.773	-0.73177	0.0015397	0.027234	-//-
Niben101Scf02122g02019	95.3506	177.64	-0.89764	1.2594e-05	0.00063193	sp|Q84WV0|GLYC7_ARATH Serine hydroxymethyltransferase 7 OS=Arabidopsis thaliana GN=SHM7 PE=2 SV=1//0
Niben101Scf02124g00016	295.682	467.768	-0.66175	7.8374e-05	0.0027867	-//-
Niben101Scf02124g01021	551.023	187.379	1.5562	1.2617e-09	2.4634e-07	sp|Q9SAG8|DNAJ8_ARATH Chaperone protein dnaJ 8, chloroplastic OS=Arabidopsis thaliana GN=ATJ8 PE=2 SV=1//8.65899e-27
Niben101Scf02128g00025	607.99	1105.37	-0.86241	4.7595e-06	0.00028729	sp|P27524|CB4A_SOLLC Chlorophyll a-b binding protein CP24 10A, chloroplastic OS=Solanum lycopersicum GN=CAP10A PE=3 SV=1//1.33602e-17
Niben101Scf02128g00039	144.01	251.125	-0.80223	2.3799e-05	0.0010709	-//-
Niben101Scf02133g04004	224.694	333.162	-0.56826	0.0017327	0.02976	-//-
Niben101Scf02136g01002	348.604	221.674	0.65315	0.00026916	0.0073195	sp|Q75VR1|TPC1A_TOBAC Two pore calcium channel protein 1A OS=Nicotiana tabacum GN=TPC1A PE=2 SV=1//3.65769e-07
Niben101Scf02137g00006	110.134	172.916	-0.65081	0.0012288	0.02305	-//-
Niben101Scf02139g05001	69.4601	121.35	-0.80492	0.00074909	0.015913	-//-
Niben101Scf02139g07001	190.602	482.578	-1.3402	1.5771e-14	1.0265e-11	-//-
Niben101Scf02144g00003	96.7548	35.9082	1.43	1.8948e-07	1.9562e-05	-//-
Niben101Scf02145g04003	195.529	22.989	3.0884	1.6277e-14	1.0443e-11	-//-
Niben101Scf02145g05022	38.8284	17.0875	1.1842	0.0023226	0.03676	-//-
Niben101Scf02145g10005	691.214	1085.56	-0.65123	2.4246e-05	0.0010878	sp|P54260|GCST_SOLTU Aminomethyltransferase, mitochondrial OS=Solanum tuberosum GN=GDCST PE=2 SV=1//3.64443e-153
Niben101Scf02155g00004	71.5412	117.298	-0.71333	0.0026367	0.040468	-//-
Niben101Scf02155g03008	0.755791	20.7655	-4.7801	4.6982e-09	7.7906e-07	-//-
Niben101Scf02156g00008	298.211	495.771	-0.73334	1.597e-05	0.0007624	-//-
Niben101Scf02156g03022	6.01165	22.2771	-1.8897	0.00034009	0.0086538	-//-
Niben101Scf02156g03023	360.232	557.886	-0.63105	0.00059126	0.01337	sp|P93472|DIM_PEA Delta(24)-sterol reductase OS=Pisum sativum GN=DIM PE=1 SV=1//0
Niben101Scf02156g05001	3067.42	9516.85	-1.6335	2.6207e-06	0.00017698	-//-
Niben101Scf02164g04001	647.637	971.882	-0.5856	0.00027673	0.0074955	-//-
Niben101Scf02167g00006	35.7322	87.1514	-1.2863	1.7279e-06	0.00012682	sp|Q8LFN2|Y3037_ARATH Probable inactive leucine-rich repeat receptor-like protein kinase At3g03770 OS=Arabidopsis thaliana GN=At3g03770 PE=2 SV=1//0
Niben101Scf02171g00001	186.161	108.749	0.77555	0.00022598	0.0064229	sp|P46297|RS23_FRAAN 40S ribosomal protein S23 OS=Fragaria ananassa GN=RPS23 PE=2 SV=1//1.50481e-97
Niben101Scf02172g06026	0.631905	11.893	-4.2343	1.424e-05	0.00069508	-//-
Niben101Scf02172g06027	0	53.469	#NAME?	0.00062498	0.013929	-//-
Niben101Scf02173g00001	21.4811	97.2098	-2.178	1.6536e-06	0.00012275	sp|Q43716|UFOG_PETHY Anthocyanidin 3-O-glucosyltransferase OS=Petunia hybrida GN=RT PE=2 SV=1//4.58424e-72
Niben101Scf02174g03011	131.596	239.147	-0.86178	1.2936e-05	0.00064545	-//-
Niben101Scf02175g05002	28.3634	12.019	1.2387	0.0034951	0.049342	-//-
Niben101Scf02180g00002	403.817	245.27	0.71933	2.7694e-05	0.0012051	-//-
Niben101Scf02182g07005	164.251	248.487	-0.59727	0.0027456	0.04167	sp|Q55909|Y305_SYNY3 TVP38/TMEM64 family membrane protein slr0305 OS=Synechocystis sp. (strain PCC 6803 / Kazusa) GN=slr0305 PE=3 SV=1//1.01485e-20
Niben101Scf02182g18003	475.252	279.144	0.76768	6.4341e-05	0.0023853	sp|O82528|RL15_PETHY 60S ribosomal protein L15 OS=Petunia hybrida GN=RPL15 PE=2 SV=1//2.61952e-116
Niben101Scf02182g18008	333.647	211.379	0.65849	0.0003798	0.0094426	sp|O82528|RL15_PETHY 60S ribosomal protein L15 OS=Petunia hybrida GN=RPL15 PE=2 SV=1//6.61506e-120
Niben101Scf02190g04003	154.674	243.96	-0.65742	0.0006143	0.013752	-//-
Niben101Scf02191g00016	474.086	822.856	-0.79549	0.00025177	0.0069707	sp|Q9MA74|SDC1_ARATH Serine decarboxylase OS=Arabidopsis thaliana GN=SDC PE=1 SV=1//0
Niben101Scf02191g03003	195.726	8.59024	4.51	5.9621e-07	5.2294e-05	-//-
Niben101Scf02195g00002	55.0787	115.078	-1.063	4.6147e-06	0.00028043	-//-
Niben101Scf02195g07005	61.6884	110.734	-0.84403	0.00023966	0.0067015	-//-
Niben101Scf02199g01010	45.2928	19.6097	1.2077	0.0019699	0.032596	-//-
Niben101Scf02203g04006	82.9007	131.353	-0.66399	0.0034457	0.048845	-//-
Niben101Scf02207g05012	59.9921	27.6135	1.1194	0.00076345	0.016149	-//-
Niben101Scf02210g01002	28.3595	78.2246	-1.4638	3.1895e-07	3.0605e-05	-//-
Niben101Scf02210g03007	118.746	65.6318	0.85541	0.00023631	0.0066409	-//-
Niben101Scf02210g10009	136.291	234.063	-0.78021	0.00029917	0.0079262	-//-
Niben101Scf02211g03005	175.316	102.123	0.77965	0.00018612	0.0055578	-//-
Niben101Scf02215g04006	66.1495	152.64	-1.2063	3.5316e-08	4.4055e-06	sp|O64823|MCU2_ARATH Calcium uniporter protein 2, mitochondrial OS=Arabidopsis thaliana GN=At2g23790 PE=2 SV=1//3.28093e-101
Niben101Scf02216g02012	587.533	351.712	0.74028	0.00017011	0.0051755	sp|P68428|H32_WHEAT Histone H3.2 OS=Triticum aestivum PE=1 SV=2//1.31296e-78
Niben101Scf02230g02002	300.722	206.252	0.54402	0.0033098	0.047527	sp|Q8DJB3|GRPE_THEEB Protein GrpE OS=Thermosynechococcus elongatus (strain BP-1) GN=grpE PE=3 SV=1//1.18007e-31
Niben101Scf02232g00001	118.769	209.829	-0.82105	2.5825e-05	0.0011399	-//-
Niben101Scf02237g04007	309.032	463.501	-0.58482	0.00065959	0.014417	-//-
Niben101Scf02237g04009	101.455	213.46	-1.0731	1.4097e-07	1.5073e-05	-//-
Niben101Scf02240g02009	811.032	521.965	0.6358	0.00010369	0.0035169	sp|P41129|RL132_BRANA 60S ribosomal protein L13-2 OS=Brassica napus PE=2 SV=1//2.03299e-107
Niben101Scf02240g09006	7.847	167.959	-4.4198	8.7469e-48	9.8202e-44	-//-
Niben101Scf02242g01006	158.344	79.9477	0.98593	3.538e-05	0.0014676	-//-
Niben101Scf02243g00009	500.424	333.79	0.58421	0.00059641	0.013466	sp|Q9SIM4|RL141_ARATH 60S ribosomal protein L14-1 OS=Arabidopsis thaliana GN=RPL14A PE=2 SV=1//3.57761e-58
Niben101Scf02243g01029	354.277	240.682	0.55775	0.0018166	0.030755	-//-
Niben101Scf02244g00006	20.5268	45.9929	-1.1639	0.00080751	0.016851	-//-
Niben101Scf02245g00008	128.272	77.2122	0.7323	0.0013882	0.025178	-//-
Niben101Scf02246g00003	220.06	494.281	-1.1674	1.5392e-11	4.767e-09	-//-
Niben101Scf02246g01012	541.573	795.949	-0.55552	0.00051994	0.012023	-//-
Niben101Scf02246g03010	22.9518	8.14206	1.4951	0.0024947	0.038806	-//-
Niben101Scf02248g00001	32.9005	14.175	1.2148	0.00302	0.044613	-//-
Niben101Scf02249g02011	333.804	170.76	0.96703	2.4099e-07	2.3996e-05	-//-
Niben101Scf02250g02001	208.187	778.379	-1.9026	3.9587e-13	1.814e-10	-//-
Niben101Scf02262g01013	1521.74	2720.21	-0.83799	2.2425e-08	3.0151e-06	sp|P10707|CB2D_SOLLC Chlorophyll a-b binding protein 1D (Fragment) OS=Solanum lycopersicum GN=CAB1D PE=3 SV=1//3.60345e-41
Niben101Scf02264g03012	186.528	303.003	-0.69994	0.00016406	0.0050325	-//-
Niben101Scf02264g05017	592.527	961.163	-0.6979	7.6082e-06	0.00042041	-//-
Niben101Scf02264g06012	215.667	341.534	-0.66322	0.00020459	0.0059776	-//-
Niben101Scf02266g01010	310.424	200.458	0.63094	0.00054872	0.012579	-//-
Niben101Scf02280g04013	627.667	1040.41	-0.72908	2.3754e-06	0.00016411	-//-
Niben101Scf02280g06010	142.012	235.901	-0.73217	0.00013132	0.0042456	-//-
Niben101Scf02280g08005	121.699	226.94	-0.89899	4.643e-06	0.00028139	-//-
Niben101Scf02282g00001	258.35	140.736	0.87633	6.527e-05	0.0024085	-//-
Niben101Scf02283g00007	660.606	1148.59	-0.798	3.0668e-07	2.9682e-05	sp|F4JKH6|TSS_ARATH Protein TSS OS=Arabidopsis thaliana GN=TSS PE=1 SV=1//0
Niben101Scf02287g00002	133.77	204.586	-0.61295	0.0014661	0.026211	-//-
Niben101Scf02287g01008	156.929	99.0072	0.66451	0.0019845	0.032753	-//-
Niben101Scf02290g02021	380.001	575.348	-0.59843	0.00021816	0.0062696	-//-
Niben101Scf02290g05024	19706.3	5115.27	1.9458	2.0173e-25	5.329e-22	-//-
Niben101Scf02290g09003	148.275	224.115	-0.59596	0.0025548	0.039526	-//-
Niben101Scf02291g03004	39.5636	16.4776	1.2637	0.00090253	0.018282	-//-
Niben101Scf02298g01017	28.085	8.61842	1.7043	0.00026588	0.007254	-//-
Niben101Scf02316g00011	71.9119	194.486	-1.4354	0.0010549	0.020623	-//-
Niben101Scf02316g01002	128.917	203.707	-0.66005	0.00087886	0.017904	-//-
Niben101Scf02316g03019	23.7128	54.6327	-1.2041	0.00022149	0.0063315	sp|Q9LVM0|Y5830_ARATH Probable inactive receptor kinase At5g58300 OS=Arabidopsis thaliana GN=At5g58300 PE=2 SV=1//0
Niben101Scf02319g06001	312.477	628.018	-1.0071	9.1628e-10	1.8962e-07	-//-
Niben101Scf02319g06012	295.814	194.683	0.60356	0.0011947	0.022619	sp|Q8LFH7|RL371_ARATH 60S ribosomal protein L37-1 OS=Arabidopsis thaliana GN=RPL37A PE=3 SV=1//4.86887e-53
Niben101Scf02322g03009	4.57581	18.6219	-2.0249	0.00057192	0.013009	-//-
Niben101Scf02325g01004	71.9962	32.3858	1.1526	9.9969e-05	0.0034086	-//-
Niben101Scf02325g03023	53.9721	25.5841	1.077	0.00064083	0.014121	-//-
Niben101Scf02325g03024	13.236	0.380676	5.1198	0.00010463	0.0035461	-//-
Niben101Scf02340g03007	70.9942	137.389	-0.95249	2.4545e-05	0.0010971	-//-
Niben101Scf02340g07012	9.78155	948.484	-6.5994	7.0142e-20	9.2645e-17	sp|Q93YV0|GES_ARATH (E,E)-geranyllinalool synthase OS=Arabidopsis thaliana GN=GES PE=1 SV=1//0
Niben101Scf02345g00006	277.571	398.327	-0.5211	0.0024591	0.038411	-//-
Niben101Scf02346g02002	90.3273	141.251	-0.64502	0.0024959	0.038811	-//-
Niben101Scf02348g05006	90.0541	43.2085	1.0595	0.002139	0.034716	-//-
Niben101Scf02348g13007	10.0425	31.2693	-1.6386	0.00031364	0.0082031	sp|Q8RJP2|RHIE_DICD3 Rhamnogalacturonate lyase OS=Dickeya dadantii (strain 3937) GN=rhiE PE=1 SV=1//8.90954e-23
Niben101Scf02349g03001	68.1511	113.612	-0.7373	0.0017978	0.030536	-//-
Niben101Scf02351g08011	554.841	983.313	-0.82558	0.0012941	0.023955	-//-
Niben101Scf02353g02004	330.059	188.527	0.80795	1.0897e-05	0.0005638	sp|O80377|RSSA_DAUCA 40S ribosomal protein SA OS=Daucus carota GN=179B PE=2 SV=1//3.59678e-143
Niben101Scf02354g02009	290.173	193.642	0.58352	0.0019004	0.031738	sp|Q8LEM8|RL373_ARATH 60S ribosomal protein L37-3 OS=Arabidopsis thaliana GN=RPL37C PE=3 SV=1//9.50253e-50
Niben101Scf02354g04005	297.351	630.925	-1.0853	4.3316e-06	0.00026757	-//-
Niben101Scf02359g00008	242.701	453.911	-0.90323	1.5383e-07	1.6255e-05	sp|O65567|PP342_ARATH Pentatricopeptide repeat-containing protein At4g30825, chloroplastic OS=Arabidopsis thaliana GN=At4g30825 PE=2 SV=2//0
Niben101Scf02360g03024	47.7093	87.4289	-0.87384	0.001058	0.020666	-//-
Niben101Scf02361g07001	236.328	353.673	-0.58162	0.0010449	0.020473	-//-
Niben101Scf02362g03003	62.7296	115.257	-0.87764	0.00022686	0.006444	-//-
Niben101Scf02364g01002	148.953	89.2738	0.73855	0.0020358	0.033415	-//-
Niben101Scf02366g02001	331.924	473.898	-0.51373	0.0021821	0.035225	-//-
Niben101Scf02367g00006	7.51101	35.4594	-2.2391	4.3324e-07	4.0115e-05	-//-
Niben101Scf02370g02007	1421.94	975.664	0.5434	0.00045363	0.010739	sp|P50346|RLA0_SOYBN 60S acidic ribosomal protein P0 OS=Glycine max PE=2 SV=1//1.67855e-166
Niben101Scf02373g05008	380.226	43.3366	3.1332	0.0018171	0.030755	sp|Q9SYT0|ANXD1_ARATH Annexin D1 OS=Arabidopsis thaliana GN=ANN1 PE=1 SV=1//2.5447e-107
Niben101Scf02375g01005	777.984	536.069	0.53732	0.0032539	0.047134	-//-
Niben101Scf02381g03005	65.9915	119.247	-0.8536	0.00026851	0.0073169	-//-
Niben101Scf02381g04020	277.675	510.938	-0.87975	0.00025658	0.0070689	-//-
Niben101Scf02381g04022	4906.36	2896.5	0.76034	0.00048691	0.011383	sp|P26573|RBS8_NICPL Ribulose bisphosphate carboxylase small chain 8B, chloroplastic OS=Nicotiana plumbaginifolia GN=RBCS-8B PE=3 SV=1//3.0454e-115
Niben101Scf02381g05007	158.654	237.776	-0.58372	0.0016141	0.028216	-//-
Niben101Scf02381g08015	304.266	209.029	0.54163	0.0032581	0.047153	sp|P42795|RL111_ARATH 60S ribosomal protein L11-1 OS=Arabidopsis thaliana GN=RPL11A PE=2 SV=2//8.81384e-112
Niben101Scf02383g00003	1942.78	1343.5	0.53212	0.00050421	0.011708	sp|P50346|RLA0_SOYBN 60S acidic ribosomal protein P0 OS=Glycine max PE=2 SV=1//3.05344e-166
Niben101Scf02384g00005	0.331834	6.62626	-4.3197	0.001425	0.025655	-//-
Niben101Scf02385g01005	222.459	91.4718	1.2821	3.898e-10	8.7525e-08	-//-
Niben101Scf02393g01014	162.944	75.2866	1.1139	2.9312e-07	2.8492e-05	sp|P38500|NIR_BETPN Ferredoxin--nitrite reductase, chloroplastic OS=Betula pendula GN=NIR1 PE=2 SV=1//0
Niben101Scf02399g01011	46.1896	123.668	-1.4208	1.1694e-08	1.705e-06	sp|Q6YU51|DXS2_ORYSJ Probable 1-deoxy-D-xylulose-5-phosphate synthase 2, chloroplastic OS=Oryza sativa subsp. japonica GN=Os07g0190000 PE=2 SV=1//5.49827e-24
Niben101Scf02399g04004	123.763	68.8055	0.84699	0.0022305	0.0358	-//-
Niben101Scf02405g02003	83.8896	168.779	-1.0086	1.8391e-06	0.00013297	-//-
Niben101Scf02406g02001	359.511	5.27845	6.0898	2.3531e-11	7.0921e-09	-//-
Niben101Scf02406g04044	824.126	283.92	1.5374	1.8042e-20	2.88e-17	-//-
Niben101Scf02407g03001	321.047	453.47	-0.49822	0.0027563	0.041775	sp|Q8LPS6|PPR3_ARATH Pentatricopeptide repeat-containing protein At1g02150 OS=Arabidopsis thaliana GN=At1g02150 PE=2 SV=2//0
Niben101Scf02407g03010	43.3728	1.88478	4.5243	0.0019841	0.032753	-//-
Niben101Scf02408g01007	13.6693	53.2768	-1.9626	2.6198e-06	0.00017698	-//-
Niben101Scf02408g02007	42.084	87.9515	-1.0634	0.00020984	0.0061012	-//-
Niben101Scf02410g00002	69.5538	3.0619	4.5056	4.5002e-05	0.0017806	sp|Q05537|CHID_SOLLC Basic endochitinase (Fragment) OS=Solanum lycopersicum GN=CHI14 PE=2 SV=1//1.42163e-152
Niben101Scf02413g01014	270.646	438.044	-0.69467	8.0022e-05	0.0028305	sp|A7Q6G6|CSPL9_VITVI CASP-like protein 2C1 OS=Vitis vinifera GN=VIT_11s0052g01140 PE=2 SV=1//3.55488e-49
Niben101Scf02413g03030	129.903	222.143	-0.77406	6.5267e-05	0.0024085	-//-
Niben101Scf02414g02013	166.573	358.719	-1.1067	1.1268e-08	1.6591e-06	-//-
Niben101Scf02417g06008	468.513	782.76	-0.74048	3.2484e-06	0.00020979	-//-
Niben101Scf02420g05001	10.4125	31.164	-1.5816	0.00028086	0.0075798	-//-
Niben101Scf02423g03009	31.9317	12.43	1.3612	0.0032826	0.047353	-//-
Niben101Scf02425g04005	418.237	595.306	-0.50931	0.0025474	0.039453	-//-
Niben101Scf02426g01007	60.04	121.734	-1.0197	0.00049345	0.011494	-//-
Niben101Scf02427g01001	94.7628	172.519	-0.86436	3.8803e-05	0.0015841	-//-
Niben101Scf02429g01002	389.394	580.393	-0.5758	0.00053274	0.012275	-//-
Niben101Scf02429g02004	271.463	398.8	-0.55491	0.0021047	0.034283	sp|P9WPZ5|DAPC_MYCTU Probable N-succinyldiaminopimelate aminotransferase DapC OS=Mycobacterium tuberculosis (strain ATCC 25618 / H37Rv) GN=dapC PE=1 SV=1//1.82336e-99
Niben101Scf02433g06003	5708.56	3044.63	0.90686	1.9029e-05	0.00088006	sp|P31237|ACCO_ACTDE 1-aminocyclopropane-1-carboxylate oxidase OS=Actinidia deliciosa GN=ACO PE=2 SV=1//1.99195e-54
Niben101Scf02436g00004	272.033	638.612	-1.2312	9.7124e-11	2.5507e-08	sp|Q39639|PLSB_CUCSA Glycerol-3-phosphate acyltransferase, chloroplastic OS=Cucumis sativus PE=2 SV=1//0
Niben101Scf02438g02011	115.692	60.1466	0.94374	0.00079047	0.016596	-//-
Niben101Scf02440g00006	326.201	219.091	0.57423	0.0016422	0.028629	-//-
Niben101Scf02441g01009	149.496	78.8861	0.92227	5.7972e-05	0.0021988	sp|P0CG89|H4_SOYBN Histone H4 OS=Glycine max PE=3 SV=1//3.58019e-51
Niben101Scf02446g00024	257.432	386.482	-0.58621	0.0007342	0.015649	sp|Q9FFZ1|PPH_ARATH Pheophytinase, chloroplastic OS=Arabidopsis thaliana GN=PPH PE=1 SV=1//5.27179e-10
Niben101Scf02450g03009	44.5881	19.5464	1.1898	0.00093741	0.018802	-//-
Niben101Scf02451g01004	332.624	129.93	1.3562	0.00014062	0.0044628	-//-
Niben101Scf02451g09003	197.349	310.137	-0.65216	0.00031645	0.0082591	-//-
Niben101Scf02451g10027	124.555	37.6898	1.7245	0.00016152	0.0049797	sp|O48818|EXPA4_ARATH Expansin-A4 OS=Arabidopsis thaliana GN=EXPA4 PE=1 SV=1//1.31103e-150
Niben101Scf02452g01002	191.667	299.79	-0.64535	0.00044224	0.01053	-//-
Niben101Scf02452g01003	344.913	221.597	0.6383	0.00044858	0.010653	-//-
Niben101Scf02459g07002	51.5593	117.606	-1.1897	1.2047e-06	9.4585e-05	-//-
Niben101Scf02459g09004	821.576	516.619	0.66929	4.0628e-05	0.0016482	-//-
Niben101Scf02461g02002	89.8027	144.969	-0.69092	0.0011473	0.021963	sp|Q9FPR3|EDR1_ARATH Serine/threonine-protein kinase EDR1 OS=Arabidopsis thaliana GN=EDR1 PE=1 SV=1//2.19668e-47
Niben101Scf02466g04004	46.9456	86.5719	-0.88291	0.00066552	0.014494	-//-
Niben101Scf02468g06012	239.82	683.448	-1.5109	5.7634e-19	7.3949e-16	-//-
Niben101Scf02468g13002	31.9212	7.49021	2.0914	0.001674	0.02906	-//-
Niben101Scf02469g00016	61.2417	101.895	-0.73449	0.0021612	0.034961	-//-
Niben101Scf02471g05006	120.651	187.927	-0.63933	0.0015516	0.027347	-//-
Niben101Scf02471g06004	79.7304	132.957	-0.73775	0.00088903	0.018057	-//-
Niben101Scf02471g06005	487.098	334.643	0.54159	0.0020078	0.033035	-//-
Niben101Scf02476g03009	9.94136	29.7934	-1.5835	0.00029061	0.0077498	-//-
Niben101Scf02477g00012	387.457	216.09	0.8424	3.0216e-06	0.00019751	-//-
Niben101Scf02479g02013	510.409	736.229	-0.5285	0.0010757	0.020893	-//-
Niben101Scf02480g00001	70.4381	146.728	-1.0587	2.4683e-06	0.00016872	-//-
Niben101Scf02480g02012	2138.85	4811.9	-1.1698	5.6431e-15	4.0226e-12	sp|O49954|GCSP_SOLTU Glycine dehydrogenase (decarboxylating), mitochondrial OS=Solanum tuberosum GN=GDCSP PE=2 SV=1//0
Niben101Scf02494g08002	191.451	115.319	0.73134	0.00039015	0.0096214	sp|P62302|RS13_SOYBN 40S ribosomal protein S13 OS=Glycine max GN=RPS13 PE=2 SV=1//1.53727e-100
Niben101Scf02494g10012	235.736	129.74	0.86155	0.0018764	0.031453	sp|Q9FHM7|HIR4_ARATH Hypersensitive-induced response protein 4 OS=Arabidopsis thaliana GN=HIR4 PE=1 SV=1//3.7071e-174
Niben101Scf02502g08006	136.175	80.4178	0.75988	0.0010591	0.02067	-//-
Niben101Scf02502g14001	369.441	721.04	-0.96473	0.00018234	0.0054626	-//-
Niben101Scf02502g14004	305.915	570.196	-0.89832	0.00033	0.008478	-//-
Niben101Scf02502g15014	571.004	345.315	0.72559	1.8092e-05	0.00084282	sp|O65743|RL24_CICAR 60S ribosomal protein L24 OS=Cicer arietinum GN=RPL24 PE=2 SV=1//6.16744e-71
Niben101Scf02503g00004	68.1069	15.2564	2.1584	1.6301e-07	1.7064e-05	-//-
Niben101Scf02511g05005	31.5231	110.866	-1.8143	4.4691e-12	1.5438e-09	-//-
Niben101Scf02513g04004	1015.04	1466.28	-0.53062	0.00041568	0.010127	-//-
Niben101Scf02513g08002	352.687	656.355	-0.89609	4.8263e-08	5.8263e-06	sp|Q339D2|P2C71_ORYSJ Probable protein phosphatase 2C 71 OS=Oryza sativa subsp. japonica GN=Os10g0370000 PE=2 SV=1//6.81177e-93
Niben101Scf02513g08007	9597.57	13445.4	-0.48637	0.0032603	0.04717	-//-
Niben101Scf02517g06004	366.828	604.285	-0.72012	1.0885e-05	0.0005638	-//-
Niben101Scf02517g17005	30.0306	10.8722	1.4658	0.0032246	0.046894	-//-
Niben101Scf02517g18010	27.4817	10.0991	1.4442	0.0013491	0.024649	-//-
Niben101Scf02525g03002	205.064	354.413	-0.78936	1.1551e-05	0.00058974	-//-
Niben101Scf02526g02006	195.662	123.353	0.66557	0.00079636	0.01668	sp|Q551H4|FRAY2_DICDI Serine/threonine-protein kinase fray2 OS=Dictyostelium discoideum GN=fray2 PE=3 SV=1//9.80231e-98
Niben101Scf02532g01009	125.44	69.9554	0.84249	0.00020633	0.0060169	sp|Q9C7C1|TET6_ARATH Tetraspanin-6 OS=Arabidopsis thaliana GN=TET6 PE=2 SV=1//1.29739e-105
Niben101Scf02537g06001	34.9047	7.5625	2.2065	1.11e-06	8.838e-05	sp|Q9ZPE7|EXO_ARATH Protein EXORDIUM OS=Arabidopsis thaliana GN=EXO PE=2 SV=1//1.56473e-109
Niben101Scf02537g13011	74.4437	118.894	-0.67545	0.0029574	0.043918	-//-
Niben101Scf02537g15006	731.559	1033.93	-0.4991	0.0013533	0.024694	-//-
Niben101Scf02540g00009	19.4986	4.79039	2.0252	0.0027258	0.041495	-//-
Niben101Scf02543g04010	185.643	470.936	-1.343	3.8543e-13	1.7844e-10	-//-
Niben101Scf02549g01001	367.226	236.634	0.63401	0.00033998	0.0086538	-//-
Niben101Scf02558g00020	92.9686	53.0935	0.80821	0.0019912	0.032828	-//-
Niben101Scf02562g00024	350.741	223.411	0.6507	0.00032556	0.0083928	-//-
Niben101Scf02562g01010	5.08284	122.04	-4.5856	1.0984e-21	1.973e-18	-//-
Niben101Scf02572g00014	289.325	421.972	-0.54446	0.0013708	0.024923	-//-
Niben101Scf02575g00005	93.6912	152.596	-0.70373	0.0011273	0.021644	sp|Q93Y06|Y5720_ARATH Probable inactive receptor kinase At5g67200 OS=Arabidopsis thaliana GN=At5g67200 PE=1 SV=1//0
Niben101Scf02576g00035	388.641	707.931	-0.86517	8.7417e-08	9.9637e-06	-//-
Niben101Scf02581g00006	68.8001	244.714	-1.8306	1.2669e-12	4.9908e-10	-//-
Niben101Scf02581g01011	44.8009	78.9041	-0.81657	0.002341	0.036966	sp|Q9FLS9|PP441_ARATH Pentatricopeptide repeat-containing protein At5g61800 OS=Arabidopsis thaliana GN=PCMP-E8 PE=2 SV=1//2.94832e-173
Niben101Scf02581g04012	176.039	91.4772	0.94441	0.0010587	0.02067	-//-
Niben101Scf02581g05002	196.562	334.096	-0.76528	0.0003127	0.0081834	-//-
Niben101Scf02582g00003	875.426	514.423	0.76703	2.6362e-06	0.00017776	sp|P41099|RLA2_PARAR 60S acidic ribosomal protein P2 OS=Parthenium argentatum PE=3 SV=1//4.74048e-26
Niben101Scf02583g02013	1337.79	3153.27	-1.237	4.8578e-06	0.00029169	-//-
Niben101Scf02585g00002	40.7634	6.28067	2.6983	0.0028156	0.042388	-//-
Niben101Scf02589g04005	60.0885	26.1961	1.1977	0.0017147	0.029606	-//-
Niben101Scf02597g00003	44.3332	20.1191	1.1398	0.0016773	0.029095	-//-
Niben101Scf02602g01015	85.4295	139.686	-0.70938	0.001467	0.026216	-//-
Niben101Scf02603g01013	66.5432	115.351	-0.79367	0.00079352	0.016637	-//-
Niben101Scf02608g03004	107.824	249.923	-1.2128	5.4472e-10	1.1933e-07	sp|Q8LPQ3|Y3084_ARATH BTB/POZ domain-containing protein At3g50840 OS=Arabidopsis thaliana GN=At3g50840 PE=2 SV=2//0
Niben101Scf02608g03021	7010.21	10184.9	-0.5389	0.0016747	0.029061	-//-
Niben101Scf02613g02007	559.377	366.845	0.60865	0.00034919	0.0088396	sp|Q9ATF5|RL18A_CASSA 60S ribosomal protein L18a OS=Castanea sativa GN=RPL18A PE=2 SV=1//1.82432e-114
Niben101Scf02613g03001	121.787	181.884	-0.57866	0.003246	0.047084	-//-
Niben101Scf02614g00010	796.308	496.977	0.68015	2.7338e-05	0.0011908	sp|P93847|RL10_SOLME 60S ribosomal protein L10 OS=Solanum melongena GN=RPL10 PE=2 SV=1//3.95665e-153
Niben101Scf02621g00013	11.1888	1.4738	2.9244	0.0011771	0.022376	-//-
Niben101Scf02621g04025	95.9118	46.3241	1.0499	4.433e-05	0.0017633	-//-
Niben101Scf02622g07001	80.1685	139.757	-0.80182	0.00042511	0.010258	-//-
Niben101Scf02622g08012	91.3717	44.0332	1.0532	5.8858e-05	0.0022254	-//-
Niben101Scf02622g10003	1479.15	616.731	1.2621	5.0776e-15	3.6778e-12	-//-
Niben101Scf02622g12006	1.41946	24.9679	-4.1367	6.7502e-10	1.4504e-07	-//-
Niben101Scf02622g12016	82.9859	138.125	-0.73504	0.0013125	0.024198	-//-
Niben101Scf02626g00011	897.338	512.36	0.80849	0.00023814	0.0066713	-//-
Niben101Scf02627g01025	40.9155	81.2334	-0.98943	0.0026648	0.040816	-//-
Niben101Scf02631g00008	14.4167	1.08143	3.7367	1.8005e-05	0.00083962	-//-
Niben101Scf02632g03006	109.022	38.1923	1.5133	2.132e-06	0.00014994	-//-
Niben101Scf02636g04010	256.145	465.705	-0.86246	8.973e-07	7.3667e-05	-//-
Niben101Scf02637g01005	971.555	615.376	0.65883	3.7555e-05	0.0015472	sp|Q93VB8|RS22_ARATH 40S ribosomal protein S2-2 OS=Arabidopsis thaliana GN=RPS2B PE=2 SV=1//1.00427e-142
Niben101Scf02637g02013	615.334	409.07	0.58902	0.00040843	0.0099847	sp|Q93VB8|RS22_ARATH 40S ribosomal protein S2-2 OS=Arabidopsis thaliana GN=RPS2B PE=2 SV=1//3.3502e-144
Niben101Scf02639g03012	288.767	147.882	0.96546	5.462e-07	4.8959e-05	-//-
Niben101Scf02646g02007	302.062	182.91	0.72371	0.00010815	0.0036421	-//-
Niben101Scf02648g01001	55.0663	21.8709	1.3322	0.001727	0.029701	-//-
Niben101Scf02653g06003	82.1984	47.9611	0.77724	0.0027354	0.041585	-//-
Niben101Scf02658g03022	326.524	467.901	-0.51901	0.0028942	0.043224	-//-
Niben101Scf02658g05007	342.744	492.834	-0.52397	0.0015204	0.026988	-//-
Niben101Scf02659g01005	481.944	704.094	-0.5469	0.00071476	0.015324	sp|Q8H103|G6PIP_ARATH Glucose-6-phosphate isomerase 1, chloroplastic OS=Arabidopsis thaliana GN=PGI1 PE=1 SV=1//0
Niben101Scf02663g00023	707.13	439.592	0.68581	0.00038566	0.0095423	-//-
Niben101Scf02665g12003	46.245	21.8448	1.082	0.0014206	0.02561	-//-
Niben101Scf02668g01013	56.1483	93.0626	-0.72896	0.0033355	0.04772	sp|Q8LPG9|IQD14_ARATH Protein IQ-DOMAIN 14 OS=Arabidopsis thaliana GN=IQD14 PE=1 SV=1//1.09934e-07
Niben101Scf02693g02014	61.1681	23.828	1.3601	0.0013944	0.025271	-//-
Niben101Scf02694g02005	14.253	33.0446	-1.2131	0.0018245	0.030848	-//-
Niben101Scf02699g02013	1493.92	2122.27	-0.50651	0.000548	0.012569	-//-
Niben101Scf02705g01019	34.0886	12.6427	1.431	0.00065565	0.014375	-//-
Niben101Scf02705g01020	333.716	176.525	0.91874	0.0010468	0.020492	-//-
Niben101Scf02714g00005	823.426	1316.26	-0.67673	1.3247e-05	0.00065882	-//-
Niben101Scf02714g04004	165.273	250.032	-0.59726	0.0018942	0.031658	-//-
Niben101Scf02714g06023	29.784	7.99687	1.897	0.0018669	0.031354	-//-
Niben101Scf02714g07006	72.8968	231.207	-1.6653	5.9722e-11	1.6448e-08	-//-
Niben101Scf02736g07003	412.517	230.573	0.83923	0.0007205	0.015422	-//-
Niben101Scf02738g01012	14.4886	32.4183	-1.1619	0.0031343	0.045936	-//-
Niben101Scf02738g02001	412.613	1003.73	-1.2825	1.4099e-15	1.1512e-12	-//-
Niben101Scf02738g03013	29.3703	124.883	-2.0881	1.0175e-15	8.4617e-13	-//-
Niben101Scf02739g01002	619.569	935.939	-0.59515	0.00018931	0.0056302	-//-
Niben101Scf02740g12007	57.1705	129.063	-1.1747	2.2264e-06	0.00015501	-//-
Niben101Scf02744g00014	1419.66	946.9	0.58426	0.00018175	0.005456	sp|O65282|CH10C_ARATH 20 kDa chaperonin, chloroplastic OS=Arabidopsis thaliana GN=CPN21 PE=1 SV=2//5.6924e-125
Niben101Scf02744g01010	413.213	263.14	0.65106	0.0001365	0.0043662	-//-
Niben101Scf02749g05024	6.02605	0	Inf	0.0016528	0.028744	-//-
Niben101Scf02749g05033	54.4498	15.2261	1.8384	0.0004281	0.010302	-//-
Niben101Scf02749g05035	259.32	395.506	-0.60897	0.00042246	0.010211	-//-
Niben101Scf02750g04026	106.646	182.684	-0.77651	0.00021235	0.0061444	-//-
Niben101Scf02751g04010	326.196	473.366	-0.53722	0.0013379	0.024514	-//-
Niben101Scf02752g05009	157.753	275.424	-0.80399	1.2516e-05	0.0006287	-//-
Niben101Scf02752g07008	121.721	28.7162	2.0836	1.1416e-10	2.9463e-08	sp|Q8L8Z8|GRXS2_ARATH Monothiol glutaredoxin-S2 OS=Arabidopsis thaliana GN=GRXS2 PE=3 SV=1//1.32827e-48
Niben101Scf02755g04002	819.263	316.165	1.3736	0.00098422	0.019549	sp|Q6YXH8|CCD41_ORYSJ Cyclin-D4-1 OS=Oryza sativa subsp. japonica GN=CYCD4-1 PE=2 SV=2//3.98352e-69
Niben101Scf02756g00005	546.232	373.92	0.54678	0.0012755	0.023729	sp|Q08069|RS8_MAIZE 40S ribosomal protein S8 OS=Zea mays GN=RPS8 PE=2 SV=2//1.08188e-103
Niben101Scf02759g01012	354.406	532.775	-0.58812	0.00061946	0.013847	sp|Q84Y18|CXIP4_ARATH CAX-interacting protein 4 OS=Arabidopsis thaliana GN=CXIP4 PE=1 SV=2//4.27331e-68
Niben101Scf02762g01004	153.36	225.127	-0.55382	0.002903	0.04334	-//-
Niben101Scf02774g01005	262.742	139.656	0.91177	2.1631e-06	0.00015131	-//-
Niben101Scf02790g05008	5.38291	17.1762	-1.674	0.0032835	0.047353	-//-
Niben101Scf02793g06004	9.43849	36.1824	-1.9387	0.0032214	0.046878	-//-
Niben101Scf02793g24006	110.496	174.081	-0.65577	0.0011006	0.021264	sp|P80030|FABI_BRANA Enoyl-[acyl-carrier-protein] reductase [NADH], chloroplastic OS=Brassica napus PE=1 SV=2//6.07784e-171
Niben101Scf02793g24016	0	8.58812	#NAME?	2.5742e-05	0.0011378	-//-
Niben101Scf02793g24017	1.51574	44.3421	-4.8706	1.2612e-12	4.9908e-10	-//-
Niben101Scf02802g00009	634.686	406.838	0.64159	0.00012576	0.0041111	sp|P35684|RL3_ORYSJ 60S ribosomal protein L3 OS=Oryza sativa subsp. japonica GN=RPL3 PE=2 SV=2//0
Niben101Scf02804g00003	237.662	132.91	0.83846	1.4517e-05	0.00070706	-//-
Niben101Scf02804g00010	1138.04	2126.77	-0.90211	2.1025e-07	2.1202e-05	-//-
Niben101Scf02805g08008	154.174	257.222	-0.73845	0.00024784	0.0068875	-//-
Niben101Scf02807g10009	26.6052	5.57992	2.2534	2.3785e-05	0.0010709	-//-
Niben101Scf02816g12003	1.4676	16.5313	-3.4937	3.6969e-06	0.00023549	-//-
Niben101Scf02818g01017	97.1223	45.3108	1.0999	2.1136e-05	0.00096852	sp|Q8LAN3|P4H4_ARATH Probable prolyl 4-hydroxylase 4 OS=Arabidopsis thaliana GN=P4H4 PE=2 SV=1//1.34422e-140
Niben101Scf02819g00005	20.3939	2.24685	3.1822	0.0016094	0.028166	-//-
Niben101Scf02819g00006	9.30946	0.392372	4.5684	0.0002462	0.0068503	sp|P29602|CPC_CUCSA Cucumber peeling cupredoxin OS=Cucumis sativus PE=1 SV=3//1.03119e-20
Niben101Scf02819g02011	234.691	148.92	0.65623	0.0019923	0.032828	-//-
Niben101Scf02821g14003	185.688	362.738	-0.96605	1.3944e-05	0.00068364	sp|Q9C7T4|BH096_ARATH Transcription factor bHLH96 OS=Arabidopsis thaliana GN=BHLH96 PE=2 SV=1//6.8937e-59
Niben101Scf02825g00007	183.631	271.774	-0.56559	0.0021749	0.035121	sp|P11402|ATPD_SPIOL ATP synthase delta chain, chloroplastic OS=Spinacia oleracea GN=ATPD PE=1 SV=2//7.09885e-19
Niben101Scf02827g07005	78.7106	15.1676	2.3756	0.0015284	0.027087	-//-
Niben101Scf02828g03012	16.0288	3.79295	2.0793	0.0011674	0.022252	-//-
Niben101Scf02828g03013	230.309	436.658	-0.92293	5.7072e-07	5.0453e-05	-//-
Niben101Scf02829g04008	40.3686	95.0181	-1.235	1.9814e-06	0.00014111	-//-
Niben101Scf02829g05006	137.487	213.019	-0.63169	0.0014259	0.025655	-//-
Niben101Scf02831g03016	34.916	11.6803	1.5798	0.00012643	0.0041257	-//-
Niben101Scf02831g08009	109.227	264.93	-1.2783	2.2636e-07	2.2741e-05	sp|Q9S746|HTH_ARATH Protein HOTHEAD OS=Arabidopsis thaliana GN=HTH PE=1 SV=1//0
Niben101Scf02836g01004	183.606	286.301	-0.64092	0.00041956	0.010168	sp|Q0WVX5|SSY4_ARATH Probable starch synthase 4, chloroplastic/amyloplastic OS=Arabidopsis thaliana GN=SS4 PE=2 SV=1//1.2896e-37
Niben101Scf02838g06004	161.985	287.569	-0.82805	8.9716e-06	0.00048309	sp|Q9XI36|MBD10_ARATH Methyl-CpG-binding domain-containing protein 10 OS=Arabidopsis thaliana GN=MBD10 PE=1 SV=1//6.38674e-22
Niben101Scf02839g02012	10683.5	1845.86	2.533	1.0363e-10	2.7057e-08	-//-
Niben101Scf02844g03014	220.266	616.922	-1.4858	1.3754e-08	1.9671e-06	sp|Q56XR0|BH071_ARATH Transcription factor bHLH71 OS=Arabidopsis thaliana GN=BHLH71 PE=1 SV=1//1.23681e-74
Niben101Scf02846g00001	55.8909	8.60673	2.6991	0.0027442	0.041663	-//-
Niben101Scf02849g01009	454.441	313.353	0.5363	0.0016533	0.028744	-//-
Niben101Scf02852g00013	265.668	121.073	1.1338	0.0024254	0.038031	-//-
Niben101Scf02852g02007	31052.6	56692.1	-0.86843	7.906e-05	0.0028067	-//-
Niben101Scf02854g09012	465.765	747.5	-0.68247	2.6411e-05	0.0011571	-//-
Niben101Scf02854g11002	53.2684	26.0818	1.0302	0.0012969	0.023991	-//-
Niben101Scf02857g03005	486.526	312.985	0.63642	0.00023213	0.0065849	sp|P46300|RS4_SOLTU 40S ribosomal protein S4 OS=Solanum tuberosum GN=RPS4 PE=2 SV=1//7.09562e-168
Niben101Scf02864g04008	2609.54	5245.35	-1.0072	6.6178e-12	2.2014e-09	sp|Q944G9|ALFC2_ARATH Probable fructose-bisphosphate aldolase 2, chloroplastic OS=Arabidopsis thaliana GN=FBA2 PE=1 SV=2//0
Niben101Scf02864g07005	292.197	442.999	-0.60036	0.00051105	0.011836	-//-
Niben101Scf02869g02011	185.036	298.38	-0.68934	0.0027077	0.041276	-//-
Niben101Scf02869g10003	59.3831	193.742	-1.706	1.1777e-14	7.8939e-12	sp|Q8W1W9|5MAT1_SALSN Malonyl-coenzyme:anthocyanin 5-O-glucoside-6&apos;&apos;&apos;-O-malonyltransferase OS=Salvia splendens GN=5MAT1 PE=1 SV=1//3.72909e-96
Niben101Scf02869g18012	116.029	46.2264	1.3277	1.293e-05	0.00064545	-//-
Niben101Scf02877g02002	641.859	127.585	2.3308	0.00041277	0.010069	-//-
Niben101Scf02891g00012	330.962	199.281	0.73186	0.00019576	0.0057838	-//-
Niben101Scf02892g01012	648.355	942.896	-0.54031	0.0027332	0.041579	-//-
Niben101Scf02893g00001	61.1205	104.505	-0.77384	0.0013399	0.02453	sp|P23419|CHS2_SOLLC Chalcone synthase 2 OS=Solanum lycopersicum GN=CHS2 PE=2 SV=2//0
Niben101Scf02893g01003	449.312	314.106	0.51646	0.0028282	0.042535	sp|Q9LIR4|ILVD_ARATH Dihydroxy-acid dehydratase, chloroplastic OS=Arabidopsis thaliana GN=DHAD PE=2 SV=1//0
Niben101Scf02897g02017	27.8453	6.119	2.1861	3.4836e-05	0.0014498	-//-
Niben101Scf02902g00007	94.3142	53.7963	0.80997	0.0016935	0.029307	sp|P68428|H32_WHEAT Histone H3.2 OS=Triticum aestivum PE=1 SV=2//1.31296e-78
Niben101Scf02902g02003	609.788	912.924	-0.58219	0.00011883	0.003921	-//-
Niben101Scf02902g03009	196.278	287.854	-0.55244	0.0027563	0.041775	-//-
Niben101Scf02908g03013	3.66338	21.8214	-2.5745	7.0082e-06	0.00039292	sp|Q9C6S5|PHSB_ARATH Probable polyamine transporter At1g31830 OS=Arabidopsis thaliana GN=At1g31830 PE=2 SV=1//0
Niben101Scf02908g06009	246.471	69.8525	1.819	4.4549e-13	1.9808e-10	sp|Q55GU0|Y9955_DICDI Probable serine/threonine-protein kinase DDB_G0267514 OS=Dictyostelium discoideum GN=DDB_G0267514 PE=3 SV=1//2.05454e-57
Niben101Scf02910g01032	33.3233	69.8699	-1.0681	0.00025889	0.0071183	-//-
Niben101Scf02910g01033	72.667	36.4164	0.99671	0.00045309	0.010739	-//-
Niben101Scf02910g01040	1804.11	2730.12	-0.59768	0.0012808	0.023817	sp|P93788|REMO_SOLTU Remorin OS=Solanum tuberosum PE=1 SV=1//7.54884e-56
Niben101Scf02912g00004	563.914	386.789	0.54393	0.0013549	0.024694	sp|Q08069|RS8_MAIZE 40S ribosomal protein S8 OS=Zea mays GN=RPS8 PE=2 SV=2//2.09361e-105
Niben101Scf02918g00003	87.7647	10.6973	3.0364	1.6865e-06	0.00012457	-//-
Niben101Scf02919g04006	513.811	341.661	0.58867	0.0031062	0.045633	-//-
Niben101Scf02922g00014	61.5664	31.5054	0.96654	0.0019394	0.032186	-//-
Niben101Scf02922g01012	97.0523	168.142	-0.79285	0.00022518	0.0064195	-//-
Niben101Scf02922g01032	63.8592	136.459	-1.0955	1.1556e-05	0.00058974	-//-
Niben101Scf02937g04001	2508.54	3779.3	-0.59127	4.8509e-05	0.0018912	-//-
Niben101Scf02937g06005	232.529	428.972	-0.88347	5.1709e-07	4.6817e-05	sp|Q07121|AMO1_ARTS1 Primary amine oxidase OS=Arthrobacter sp. (strain P1) GN=maoI PE=1 SV=1//3.8074e-154
Niben101Scf02942g00008	73.6357	128.483	-0.8031	0.00043683	0.010451	-//-
Niben101Scf02944g01014	1196.3	681.474	0.81185	5.8608e-05	0.0022211	-//-
Niben101Scf02945g01006	124.089	65.5165	0.92144	7.9585e-05	0.0028208	sp|Q9LRZ3|PUM24_ARATH Pumilio homolog 24 OS=Arabidopsis thaliana GN=APUM24 PE=2 SV=1//0
Niben101Scf02946g00003	147.458	83.9863	0.81208	0.00031949	0.0083031	-//-
Niben101Scf02946g01002	428.461	253.043	0.75978	7.042e-06	0.00039432	-//-
Niben101Scf02949g14009	519.039	338.001	0.61882	0.00033241	0.0085108	sp|P42791|RL182_ARATH 60S ribosomal protein L18-2 OS=Arabidopsis thaliana GN=RPL18B PE=1 SV=2//2.21713e-109
Niben101Scf02952g00008	106.382	65.3885	0.70215	0.0030817	0.04539	sp|O24146|4CL2_TOBAC 4-coumarate--CoA ligase 2 OS=Nicotiana tabacum GN=4CL2 PE=2 SV=1//7.23281e-44
Niben101Scf02971g05016	25056.1	38789.5	-0.6305	3.465e-05	0.0014448	-//-
Niben101Scf02972g02004	177.102	263.158	-0.57134	0.0020438	0.033509	-//-
Niben101Scf02972g08002	19.5998	54.815	-1.4837	0.0017816	0.030353	-//-
Niben101Scf02982g03003	758.291	1136.77	-0.58412	0.00012384	0.0040624	-//-
Niben101Scf02985t00010	42.1235	101.4	-1.2674	4.6224e-06	0.00028052	-//-
Niben101Scf03000g00011	412.325	650.519	-0.65781	0.00020592	0.0060126	-//-
Niben101Scf03000g01002	234.691	121.722	0.94717	0.0017136	0.029597	-//-
Niben101Scf03001g00001	25.2842	3.25599	2.9571	0.0027341	0.041579	-//-
Niben101Scf03004g03024	861.187	573.556	0.58639	0.00019641	0.0057915	-//-
Niben101Scf03009g01006	733.45	1064.8	-0.53781	0.00061853	0.013833	-//-
Niben101Scf03009g03002	54.4574	25.0657	1.1194	0.00039499	0.0097047	sp|Q9STX0|WRKY7_ARATH Probable WRKY transcription factor 7 OS=Arabidopsis thaliana GN=WRKY7 PE=2 SV=1//1.16874e-60
Niben101Scf03011g01008	92.5823	54.4008	0.76711	0.0028066	0.042309	-//-
Niben101Scf03012g03021	48.949	7.43652	2.7186	0.0011009	0.021264	sp|O22820|U74F1_ARATH UDP-glycosyltransferase 74F1 OS=Arabidopsis thaliana GN=UGT74F1 PE=1 SV=1//7.621e-147
Niben101Scf03020g00009	45.7759	7.03033	2.7029	3.9838e-10	8.9008e-08	-//-
Niben101Scf03021g00010	815.168	576.148	0.50066	0.0013362	0.024514	sp|Q9LT96|Y5977_ARATH Probable leucine-rich repeat receptor-like protein kinase At5g49770 OS=Arabidopsis thaliana GN=At5g49770 PE=2 SV=1//0
Niben101Scf03021g03028	132.786	382.077	-1.5248	5.2921e-16	4.66e-13	-//-
Niben101Scf03026g01009	41.4852	0.773049	5.7459	0.000466	0.010991	-//-
Niben101Scf03028g01016	97.7396	158.837	-0.70054	0.0010236	0.020152	-//-
Niben101Scf03029g00005	97.1256	164.158	-0.75717	0.00021007	0.0061012	-//-
Niben101Scf03035g04012	2.66788	12.3625	-2.2122	0.0025343	0.039285	-//-
Niben101Scf03038g05003	0	4.83238	#NAME?	0.0030061	0.044494	-//-
Niben101Scf03038g16002	392.153	636.929	-0.69971	2.9365e-05	0.0012607	-//-
Niben101Scf03039g01020	69.7441	129.516	-0.89299	0.00019132	0.0056787	-//-
Niben101Scf03045g00010	12.4208	32.7197	-1.3974	0.00053754	0.01237	-//-
Niben101Scf03045g11007	39.233	11.4022	1.7828	0.0031845	0.046487	-//-
Niben101Scf03045g13003	137.477	38.4353	1.8387	2.7682e-13	1.3513e-10	-//-
Niben101Scf03046g01003	129.888	200.244	-0.62449	0.0018669	0.031354	-//-
Niben101Scf03050g06017	115.587	224.081	-0.95504	0.00042942	0.010323	-//-
Niben101Scf03052g00011	3005.87	1089.05	1.4647	0.0013355	0.024514	sp|P23137|GRP1_TOBAC Glycine-rich protein OS=Nicotiana tabacum GN=GRP PE=2 SV=1//4.4491e-06
Niben101Scf03062g05008	149.807	253.416	-0.7584	5.664e-05	0.0021592	-//-
Niben101Scf03064g03010	225.012	416.447	-0.88813	4.5217e-07	4.1356e-05	-//-
Niben101Scf03064g08007	84.9639	48.1882	0.81817	0.0021509	0.034858	-//-
Niben101Scf03066g00020	108.327	166.277	-0.61819	0.0032333	0.046991	-//-
Niben101Scf03068g00011	3.89577	38.0876	-3.2893	9.8434e-08	1.098e-05	-//-
Niben101Scf03068g00024	716.845	2991.14	-2.061	1.5782e-13	8.4372e-11	sp|P93111|HEM11_CUCSA Glutamyl-tRNA reductase 1, chloroplastic OS=Cucumis sativus GN=HEMA1 PE=2 SV=1//0
Niben101Scf03072g05007	52.7852	191.836	-1.8617	8.6201e-15	5.9556e-12	-//-
Niben101Scf03076g00002	140.472	211.678	-0.59158	0.0033403	0.047742	-//-
Niben101Scf03076g00013	114.432	176.223	-0.62291	0.003485	0.049231	-//-
Niben101Scf03079g00002	283.209	416.957	-0.55803	0.00098617	0.019579	sp|Q55680|Y005_SYNY3 Uncharacterized protein sll0005 OS=Synechocystis sp. (strain PCC 6803 / Kazusa) GN=sll0005 PE=3 SV=1//4.90233e-89
Niben101Scf03079g01011	18.2553	5.27845	1.7901	0.0020752	0.033914	-//-
Niben101Scf03080g02002	35.3871	13.4811	1.3923	0.0007151	0.015324	sp|Q3E7I6|GDL11_ARATH GDSL esterase/lipase At1g28650 OS=Arabidopsis thaliana GN=At1g28650 PE=2 SV=1//3.35584e-40
Niben101Scf03080g04007	478.263	157.839	1.5994	2.2151e-17	2.3134e-14	-//-
Niben101Scf03088g03009	254.813	174.262	0.54818	0.0033772	0.048137	-//-
Niben101Scf03098g00011	70.2272	163.867	-1.2224	2.5449e-08	3.3514e-06	sp|C0LGQ5|GSO1_ARATH LRR receptor-like serine/threonine-protein kinase GSO1 OS=Arabidopsis thaliana GN=GSO1 PE=2 SV=1//6.98021e-10
Niben101Scf03102g00007	4.37103	16.8817	-1.9494	0.0013707	0.024923	-//-
Niben101Scf03102g00014	32.167	72.2109	-1.1666	0.00011483	0.0038147	-//-
Niben101Scf03106g02016	80.4367	238.162	-1.566	1.4807e-05	0.00071886	-//-
Niben101Scf03108g12002	8.42661	23.7605	-1.4955	0.0018759	0.031453	-//-
Niben101Scf03110g02006	236.756	450.882	-0.92935	1.8182e-05	0.00084612	sp|P80042|GGPPS_CAPAN Geranylgeranyl pyrophosphate synthase, chloroplastic OS=Capsicum annuum GN=GGPS1 PE=3 SV=1//0
Niben101Scf03113g01013	255.141	151.679	0.75027	0.00010909	0.0036586	-//-
Niben101Scf03113g02002	911.747	587.016	0.63523	7.4616e-05	0.0026752	sp|P49209|RL91_ARATH 60S ribosomal protein L9-1 OS=Arabidopsis thaliana GN=RPL9B PE=1 SV=3//2.15393e-117
Niben101Scf03113g02012	649.667	370.098	0.81179	4.3665e-05	0.0017384	sp|P41101|RL27_SOLTU 60S ribosomal protein L27 OS=Solanum tuberosum GN=RPL27 PE=2 SV=1//5.92949e-62
Niben101Scf03113g03014	296.922	570.146	-0.94125	3.5991e-05	0.001491	sp|Q9LX31|GUN4C_ARATH Tetrapyrrole-binding protein, chloroplastic OS=Arabidopsis thaliana GN=GUN4 PE=1 SV=1//3.03415e-68
Niben101Scf03113g03018	2988.85	4002.43	-0.42129	0.0034916	0.049308	sp|Q9SA52|CP41B_ARATH Chloroplast stem-loop binding protein of 41 kDa b, chloroplastic OS=Arabidopsis thaliana GN=CSP41B PE=1 SV=1//0
Niben101Scf03114g09011	324.688	165.367	0.97338	0.00017185	0.0052074	sp|Q94AH9|MD36A_ARATH Mediator of RNA polymerase II transcription subunit 36a OS=Arabidopsis thaliana GN=MED36A PE=1 SV=2//8.78197e-92
Niben101Scf03115g03025	331.64	974.362	-1.5548	8.6021e-10	1.8052e-07	-//-
Niben101Scf03116g01003	109.529	56.7508	0.94859	0.00010644	0.0035941	-//-
Niben101Scf03121g01001	468.312	296.342	0.66021	0.00013199	0.0042582	-//-
Niben101Scf03121g04008	47.3124	16.9243	1.4831	0.00042641	0.010273	sp|Q9LTX9|HSP7G_ARATH Heat shock 70 kDa protein 7, chloroplastic OS=Arabidopsis thaliana GN=HSP70-7 PE=2 SV=1//0
Niben101Scf03121g04010	19.2907	82.0671	-2.0889	3.1375e-12	1.1183e-09	-//-
Niben101Scf03123g00017	13.8525	141.077	-3.3483	1.2815e-06	9.9054e-05	-//-
Niben101Scf03128g07024	35.5662	65.0327	-0.87066	0.0029056	0.043363	-//-
Niben101Scf03133g00003	1045.3	1518.77	-0.53898	0.00032954	0.0084758	-//-
Niben101Scf03138g01006	302.466	189.939	0.67123	0.00036219	0.0090969	-//-
Niben101Scf03138g01010	3260.34	4570.94	-0.48747	0.0024717	0.038581	sp|Q04960|DNJH_CUCSA DnaJ protein homolog OS=Cucumis sativus GN=DNAJ1 PE=2 SV=1//0
Niben101Scf03141g08015	62.9289	130.49	-1.0521	3.7133e-05	0.0015313	sp|Q9FH04|ADHL7_ARATH Alcohol dehydrogenase-like 7 OS=Arabidopsis thaliana GN=At5g42250 PE=2 SV=1//2.42973e-134
Niben101Scf03141g10006	21.1988	44.9136	-1.0832	0.001251	0.023358	-//-
Niben101Scf03150g03007	108.536	33.6656	1.6888	2.0251e-10	4.8375e-08	-//-
Niben101Scf03152g00012	233.091	345.567	-0.56807	0.0017343	0.029773	-//-
Niben101Scf03156g00009	528.147	299.851	0.8167	2.2337e-06	0.00015528	sp|P46300|RS4_SOLTU 40S ribosomal protein S4 OS=Solanum tuberosum GN=RPS4 PE=2 SV=1//1.39478e-170
Niben101Scf03157g00007	79.4857	137.026	-0.78568	0.00040189	0.0098463	-//-
Niben101Scf03160g01004	9.12106	0.742749	3.6183	0.0033347	0.04772	-//-
Niben101Scf03164g07002	80.4654	168.88	-1.0696	8.4184e-07	7.001e-05	-//-
Niben101Scf03167g02011	154.562	306.658	-0.98844	0.00029271	0.0077964	-//-
Niben101Scf03169g00006	224.451	367.904	-0.71293	7.7163e-05	0.0027502	-//-
Niben101Scf03169g02005	259.693	430.553	-0.72938	0.00010221	0.003472	-//-
Niben101Scf03169g04007	80.7567	133.432	-0.72446	0.0011326	0.021727	-//-
Niben101Scf03169g06001	374.196	567.897	-0.60183	0.00028625	0.0076791	-//-
Niben101Scf03170g03005	84.2172	38.5336	1.128	4.7843e-05	0.0018732	-//-
Niben101Scf03174g00003	6.30049	37.7255	-2.582	6.264e-06	0.00035972	sp|Q38850|MYB5_ARATH Transcription repressor MYB5 OS=Arabidopsis thaliana GN=MYB5 PE=1 SV=1//4.58928e-58
Niben101Scf03184g02002	167.064	281.56	-0.75305	4.9135e-05	0.0019104	-//-
Niben101Scf03188g06006	283.142	497.917	-0.81438	1.6173e-06	0.00012084	sp|Q9M3H5|HMA1_ARATH Probable cadmium/zinc-transporting ATPase HMA1, chloroplastic OS=Arabidopsis thaliana GN=HMA1 PE=2 SV=2//0
Niben101Scf03200g01002	109.554	172.066	-0.65132	0.0017207	0.029652	-//-
Niben101Scf03202g07011	98.9822	51.2342	0.95006	0.00023583	0.0066357	-//-
Niben101Scf03203g04003	97.831	157.497	-0.68696	0.0010126	0.019967	-//-
Niben101Scf03203g07006	279.979	180.425	0.63392	0.00084538	0.017447	sp|P34788|RS18_ARATH 40S ribosomal protein S18 OS=Arabidopsis thaliana GN=RPS18A PE=1 SV=1//1.72467e-84
Niben101Scf03204g02006	96.628	25.5406	1.9196	1.9798e-05	0.00091375	-//-
Niben101Scf03208g05006	125.05	217.67	-0.79964	5.2942e-05	0.0020408	-//-
Niben101Scf03209g00029	878.223	540.429	0.70048	1.5572e-05	0.00074742	sp|P34091|RL6_MESCR 60S ribosomal protein L6 OS=Mesembryanthemum crystallinum GN=RPL6 PE=2 SV=1//9.88422e-102
Niben101Scf03214g00006	1014.43	495.506	1.0337	5.9677e-11	1.6448e-08	sp|Q03878|GRP1_DAUCA Glycine-rich RNA-binding protein OS=Daucus carota PE=2 SV=1//1.45488e-42
Niben101Scf03216g00001	62.3283	24.5122	1.3464	0.0017599	0.030063	sp|Q8VZJ9|CRCK2_ARATH Calmodulin-binding receptor-like cytoplasmic kinase 2 OS=Arabidopsis thaliana GN=CRCK2 PE=2 SV=1//5.46089e-156
Niben101Scf03221g00006	155.67	75.9895	1.0346	2.879e-06	0.00019042	sp|Q5TZ51|MPV17_DANRE Protein Mpv17 OS=Danio rerio GN=mpv17 PE=2 SV=1//6.06334e-22
Niben101Scf03221g00007	76.3814	28.8305	1.4056	6.9902e-05	0.0025501	-//-
Niben101Scf03221g02008	134.385	72.8436	0.8835	0.00014994	0.0047188	-//-
Niben101Scf03222g01012	218.559	319.84	-0.54933	0.0026766	0.040922	-//-
Niben101Scf03224g05003	491.681	329.407	0.57785	0.00085052	0.017503	sp|Q9XHS0|RS12_HORVU 40S ribosomal protein S12 OS=Hordeum vulgare GN=RPS12 PE=2 SV=1//2.87803e-60
Niben101Scf03224g10009	3.45642	17.1949	-2.3146	0.0002647	0.0072305	sp|Q9SSD1|TMM_ARATH Protein TOO MANY MOUTHS OS=Arabidopsis thaliana GN=TMM PE=1 SV=1//5.59066e-13
Niben101Scf03239g01001	22.1716	4.4634	2.3125	6.0161e-05	0.0022589	-//-
Niben101Scf03239g02003	126.108	54.6651	1.206	6.0318e-07	5.2803e-05	sp|P46519|LEA14_SOYBN Desiccation protectant protein Lea14 homolog OS=Glycine max PE=2 SV=1//2.02097e-76
Niben101Scf03240g01006	21.7755	45.4581	-1.0618	0.00093328	0.018744	-//-
Niben101Scf03241g00014	44.8933	21.3712	1.0708	0.0026852	0.041001	-//-
Niben101Scf03254g04013	941.572	1303.36	-0.46909	0.0024313	0.038096	-//-
Niben101Scf03254g13005	169.465	15.0293	3.4951	1.0762e-18	1.3063e-15	sp|Q6MT07|DNAJ_MYCMS Chaperone protein DnaJ OS=Mycoplasma mycoides subsp. mycoides SC (strain PG1) GN=dnaJ PE=3 SV=1//1.99387e-11
Niben101Scf03255g01001	314.37	489.295	-0.63824	0.00014553	0.0045991	-//-
Niben101Scf03262g02006	96.9599	156.045	-0.6865	0.0018279	0.030882	sp|C0LGK9|Y2242_ARATH Probable LRR receptor-like serine/threonine-protein kinase At2g24230 OS=Arabidopsis thaliana GN=At2g24230 PE=2 SV=1//0
Niben101Scf03263g00007	157.83	409.009	-1.3738	3.5986e-14	2.1839e-11	-//-
Niben101Scf03263g02006	769.41	1316.3	-0.77466	0.0017662	0.030131	sp|Q9SRY4|LPA1_ARATH Protein LOW PSII ACCUMULATION 1, chloroplastic OS=Arabidopsis thaliana GN=LPA1 PE=1 SV=1//3.47776e-21
Niben101Scf03263g04009	20.2903	4.11303	2.3025	0.00043827	0.010477	sp|Q9SVU0|YUC8_ARATH Probable indole-3-pyruvate monooxygenase YUCCA8 OS=Arabidopsis thaliana GN=YUC8 PE=2 SV=1//0
Niben101Scf03280g01018	97.1207	227.292	-1.2267	4.3945e-10	9.7696e-08	-//-
Niben101Scf03281g01003	178.104	71.575	1.3152	0.00090909	0.018373	-//-
Niben101Scf03283g04012	342.547	788.855	-1.2035	7.9248e-12	2.5977e-09	sp|Q93XM7|MCAT_ARATH Mitochondrial carnitine/acylcarnitine carrier-like protein OS=Arabidopsis thaliana GN=BOU PE=2 SV=1//8.25648e-155
Niben101Scf03284g05005	95.9055	189.813	-0.98489	1.8418e-06	0.00013297	sp|Q6H501|HKT6_ORYSJ Probable cation transporter HKT6 OS=Oryza sativa subsp. japonica GN=HKT6 PE=2 SV=1//1.18951e-114
Niben101Scf03287g02004	533.864	777.22	-0.54185	0.0013378	0.024514	-//-
Niben101Scf03291g00003	194.264	295.129	-0.60332	0.0011808	0.022403	-//-
Niben101Scf03293g01006	443.425	309.722	0.51772	0.0030882	0.045426	-//-
Niben101Scf03295g09001	83.0252	38.9158	1.0932	7.7485e-05	0.0027595	-//-
Niben101Scf03300g02006	134.339	54.9788	1.2889	7.0208e-05	0.0025529	sp|Q9LTH4|PCLL_ARATH Transcription factor BOA OS=Arabidopsis thaliana GN=BOA PE=2 SV=1//5.64088e-13
Niben101Scf03300g05019	63.6728	110.043	-0.78931	0.00082719	0.017142	-//-
Niben101Scf03307g08008	235.615	148.545	0.66553	0.0015664	0.027565	-//-
Niben101Scf03320g03004	1422.9	2775.03	-0.96368	5.9401e-11	1.6448e-08	-//-
Niben101Scf03321g04018	1150.5	645.137	0.83459	3.6147e-05	0.0014948	sp|P49209|RL91_ARATH 60S ribosomal protein L9-1 OS=Arabidopsis thaliana GN=RPL9B PE=1 SV=3//2.21569e-117
Niben101Scf03326g04010	22.9983	55.2999	-1.2658	0.00015824	0.0049109	-//-
Niben101Scf03326g04013	448.213	984.017	-1.1345	9.8849e-13	3.9635e-10	-//-
Niben101Scf03332g00001	22.6713	49.1926	-1.1176	0.00091438	0.018447	-//-
Niben101Scf03337g00001	33.3224	73.9622	-1.1503	0.00063696	0.014076	sp|O22152|YAB1_ARATH Axial regulator YABBY 1 OS=Arabidopsis thaliana GN=YAB1 PE=1 SV=1//3.51952e-84
Niben101Scf03340g08011	192.418	328.516	-0.77172	2.5641e-05	0.0011345	-//-
Niben101Scf03341g00002	55.1694	24.2762	1.1843	0.00028762	0.0077114	sp|Q6NVR9|ATAD3_XENTR ATPase family AAA domain-containing protein 3 OS=Xenopus tropicalis GN=atad3 PE=2 SV=1//1.76322e-102
Niben101Scf03341g03020	334.148	564.891	-0.75749	5.3933e-06	0.00031827	-//-
Niben101Scf03345g00007	166.672	89.2618	0.90089	0.0001191	0.0039241	-//-
Niben101Scf03348g00010	14.209	1.88478	2.9143	0.00026147	0.0071685	sp|Q9LY00|WRK70_ARATH Probable WRKY transcription factor 70 OS=Arabidopsis thaliana GN=WRKY70 PE=2 SV=1//3.28784e-22
Niben101Scf03352g01001	31.0897	61.0361	-0.97323	0.001401	0.02535	sp|Q05085|PTR7_ARATH Protein NRT1/ PTR FAMILY 6.3 OS=Arabidopsis thaliana GN=NPF6.3 PE=1 SV=1//2.57742e-159
Niben101Scf03362g00002	71.4909	121.287	-0.76259	0.0010109	0.019964	-//-
Niben101Scf03370g00001	598.135	1113.58	-0.89666	1.4728e-08	2.0864e-06	-//-
Niben101Scf03370g00004	174.702	263.291	-0.59176	0.0013379	0.024514	-//-
Niben101Scf03371g00009	200.087	331.972	-0.73043	5.2786e-05	0.0020381	-//-
Niben101Scf03371g00013	1095.44	801.012	0.45161	0.0033776	0.048137	sp|Q9FMU6|MPCP3_ARATH Mitochondrial phosphate carrier protein 3, mitochondrial OS=Arabidopsis thaliana GN=MPT3 PE=2 SV=1//9.32571e-178
Niben101Scf03374g00001	4.5912	246.933	-5.7491	8.6845e-38	5.0674e-34	-//-
Niben101Scf03374g00002	0.600141	26.8527	-5.4836	8.5578e-13	3.5029e-10	-//-
Niben101Scf03374g02005	14.6738	0	Inf	9.5519e-08	1.0751e-05	-//-
Niben101Scf03374g09004	665.986	1212.84	-0.86482	4.1912e-08	5.087e-06	-//-
Niben101Scf03380g01009	505.071	735.38	-0.542	0.0010843	0.021043	-//-
Niben101Scf03385g00005	48.3179	88.1689	-0.86771	0.0008744	0.017848	sp|Q7XR61|MTK1_ORYSJ Methylthioribose kinase 1 OS=Oryza sativa subsp. japonica GN=MTK1 PE=2 SV=1//0
Niben101Scf03385g02011	179.491	26.3221	2.7696	1.3553e-05	0.00066891	sp|C0HJG8|BSP_BOSSE Basic secretory protease (Fragments) OS=Boswellia serrata PE=1 SV=1//1.8102e-09
Niben101Scf03385g05001	115.051	200.8	-0.80349	0.0033002	0.047527	sp|Q8L7W8|FUCO2_ARATH Alpha-L-fucosidase 2 OS=Arabidopsis thaliana GN=FUC95A PE=1 SV=1//5.08917e-75
Niben101Scf03385g06005	321.399	195.701	0.71571	0.00028151	0.0075883	-//-
Niben101Scf03390g06005	69.8504	222.014	-1.6683	3.8807e-07	3.6471e-05	-//-
Niben101Scf03398g04003	109.837	206.46	-0.9105	5.7551e-06	0.00033565	-//-
Niben101Scf03400g01019	158.209	275.071	-0.79798	2.607e-05	0.0011467	-//-
Niben101Scf03405g02004	123.805	191.212	-0.62711	0.0017974	0.030536	sp|Q8LEA8|EID1_ARATH Phytochrome A-associated F-box protein OS=Arabidopsis thaliana GN=EID1 PE=1 SV=2//1.15709e-122
Niben101Scf03413g02013	601.061	344.046	0.80491	0.0022228	0.035741	-//-
Niben101Scf03413g02025	177.116	263.79	-0.5747	0.0020328	0.033377	-//-
Niben101Scf03414g02002	441.585	642.403	-0.54079	0.00087107	0.017807	-//-
Niben101Scf03419g01010	126.25	240.11	-0.92741	1.6132e-06	0.00012074	-//-
Niben101Scf03419g10007	137.112	222.783	-0.70028	0.0020448	0.033513	-//-
Niben101Scf03421g04001	138.031	218.851	-0.66496	0.00053769	0.01237	-//-
Niben101Scf03422g02008	674.174	2105.72	-1.6431	2.8108e-26	7.8891e-23	-//-
Niben101Scf03426g00005	55.5555	22.8423	1.2822	8.2659e-05	0.0029069	-//-
Niben101Scf03426g02006	478.901	681.32	-0.50861	0.0019816	0.032729	-//-
Niben101Scf03434g00005	43.491	101.201	-1.2184	0.00015192	0.0047547	-//-
Niben101Scf03435g00008	8.71031	34.2562	-1.9756	6.3377e-06	0.00036303	-//-
Niben101Scf03435g01017	194.45	314.844	-0.69524	0.00018549	0.0055459	-//-
Niben101Scf03435g02018	133.156	82.7264	0.68669	0.0026502	0.040634	-//-
Niben101Scf03435g02022	58.6114	14.0001	2.0657	6.3761e-09	1.0154e-06	-//-
Niben101Scf03436g01013	94.9167	218.108	-1.2003	5.8702e-07	5.169e-05	-//-
Niben101Scf03437g01014	146.473	332.147	-1.1812	1.1093e-10	2.8797e-08	-//-
Niben101Scf03444g02004	61.1319	32.1456	0.92731	0.0025778	0.039743	-//-
Niben101Scf03445g00008	286.574	435.671	-0.60433	0.00039282	0.009672	-//-
Niben101Scf03445g05005	108.446	199.61	-0.88021	1.3541e-05	0.00066891	-//-
Niben101Scf03446g12007	465.102	320.318	0.53804	0.00151	0.026845	-//-
Niben101Scf03455g01006	477.462	954.488	-0.99934	0.00013253	0.0042694	sp|P27493|CB22_TOBAC Chlorophyll a-b binding protein 21, chloroplastic OS=Nicotiana tabacum GN=CAB21 PE=2 SV=1//1.9755e-153
Niben101Scf03455g01031	16213.7	27401.4	-0.75704	0.00074588	0.015875	sp|P27493|CB22_TOBAC Chlorophyll a-b binding protein 21, chloroplastic OS=Nicotiana tabacum GN=CAB21 PE=2 SV=1//0
Niben101Scf03455g05018	155.397	49.9959	1.6361	1.7881e-05	0.00083557	-//-
Niben101Scf03456g00004	44.8582	98.9391	-1.1412	0.00036422	0.0091377	sp|O64495|SBT12_ARATH Subtilisin-like protease SBT1.2 OS=Arabidopsis thaliana GN=SBT1.2 PE=2 SV=1//2.29676e-54
Niben101Scf03484g05007	56.4587	97.888	-0.79394	0.0011876	0.022512	-//-
Niben101Scf03486g01001	175.898	112.42	0.64584	0.0018591	0.031258	-//-
Niben101Scf03486g03002	126.647	191.32	-0.59518	0.0028002	0.042273	-//-
Niben101Scf03487g00013	1283	853.28	0.58843	0.00012286	0.0040363	-//-
Niben101Scf03491g01017	26.2927	4.87438	2.4314	0.0035406	0.049844	-//-
Niben101Scf03491g01021	263.218	542.589	-1.0436	1.0291e-09	2.0818e-07	-//-
Niben101Scf03492g02006	209.464	346.811	-0.72745	4.6102e-05	0.0018161	-//-
Niben101Scf03506g03001	258.826	59.1375	2.1298	3.4222e-09	5.8658e-07	-//-
Niben101Scf03507g01010	346.854	610.387	-0.8154	7.3509e-07	6.2893e-05	-//-
Niben101Scf03507g03003	113.782	253.529	-1.1559	9.7613e-05	0.0033386	-//-
Niben101Scf03514g00003	223.011	149.152	0.58033	0.0025845	0.039775	-//-
Niben101Scf03523g01022	334.517	216.581	0.62717	0.0006338	0.014035	sp|Q9LUQ6|RL192_ARATH 60S ribosomal protein L19-2 OS=Arabidopsis thaliana GN=RPL19B PE=2 SV=1//1.20189e-102
Niben101Scf03528g03009	224.273	323.02	-0.52637	0.0029684	0.044036	-//-
Niben101Scf03530g02009	153.308	290.232	-0.92077	0.0014243	0.025655	sp|P77806|YBDL_ECOLI Methionine aminotransferase OS=Escherichia coli (strain K12) GN=ybdL PE=1 SV=1//2.74632e-98
Niben101Scf03534g01011	617.761	344.859	0.84104	5.2778e-07	4.7593e-05	-//-
Niben101Scf03538g02003	465.784	1751.57	-1.9109	3.3354e-18	3.7973e-15	sp|Q9LV93|AB5F_ARATH ABC transporter F family member 5 OS=Arabidopsis thaliana GN=ABCF5 PE=2 SV=1//0
Niben101Scf03545g00014	212.277	340.551	-0.68192	0.00012709	0.0041419	-//-
Niben101Scf03546g00007	394.484	211.835	0.89703	0.0031544	0.046173	-//-
Niben101Scf03561g01025	46.7008	97.5068	-1.0621	2.5313e-05	0.0011222	-//-
Niben101Scf03563g00015	288.439	587.727	-1.0269	3.3074e-05	0.0013964	-//-
Niben101Scf03564g00018	217.923	313.957	-0.52675	0.002685	0.041001	-//-
Niben101Scf03565g00008	18.7756	39.4672	-1.0718	0.0033269	0.047673	-//-
Niben101Scf03572g00002	408.025	578.817	-0.50445	0.001764	0.030121	-//-
Niben101Scf03576g01033	300.08	591.025	-0.97787	5.3465e-09	8.6837e-07	-//-
Niben101Scf03576g01034	281.039	409.385	-0.54269	0.0010523	0.020582	-//-
Niben101Scf03576g01039	403.038	628.814	-0.64172	0.00012825	0.0041707	-//-
Niben101Scf03577g00018	170.746	323.001	-0.91969	6.1233e-07	5.3499e-05	-//-
Niben101Scf03584g06021	12.2784	32.4092	-1.4003	0.00064899	0.014273	-//-
Niben101Scf03595g00003	225.665	330.329	-0.54972	0.0027375	0.041602	-//-
Niben101Scf03595g09009	354.323	126.746	1.4831	8.6847e-05	0.0030304	sp|Q9FE62|YLS8_ARATH Thioredoxin-like protein YLS8 OS=Arabidopsis thaliana GN=YLS8 PE=2 SV=1//7.31962e-62
Niben101Scf03595g10007	67.654	5.73142	3.5612	4.9579e-08	5.9692e-06	sp|P52855|RLA1_MAIZE 60S acidic ribosomal protein P1 OS=Zea mays GN=RPP1A PE=1 SV=1//1.84638e-23
Niben101Scf03595g15003	817.929	446.172	0.87437	5.9909e-08	7.0614e-06	sp|Q7XTT4|NUCL2_ORYSJ Nucleolin 2 OS=Oryza sativa subsp. japonica GN=Os04g0620700 PE=2 SV=2//3.93669e-69
Niben101Scf03600g01002	237.264	423.864	-0.83711	1.3793e-06	0.00010481	-//-
Niben101Scf03600g02024	189.654	290.29	-0.61412	0.00071193	0.015294	-//-
Niben101Scf03600g04030	27.0116	64.6472	-1.259	4.1391e-05	0.0016686	-//-
Niben101Scf03628g01020	508.208	878.51	-0.78964	7.0264e-05	0.0025529	-//-
Niben101Scf03628g14017	60.4602	29.6875	1.0261	0.00087402	0.017848	-//-
Niben101Scf03634g07008	36.4571	9.68816	1.9119	6.2052e-06	0.0003568	-//-
Niben101Scf03634g07010	224.483	384.457	-0.77622	1.2246e-05	0.00061653	-//-
Niben101Scf03634g09019	91.1342	186.915	-1.0363	8.0691e-07	6.7732e-05	-//-
Niben101Scf03634g10013	48.0709	94.2418	-0.9712	0.00014451	0.0045703	-//-
Niben101Scf03634g11004	239.592	421.85	-0.81615	2.4183e-06	0.00016631	-//-
Niben101Scf03638g00009	60.9447	21.0484	1.5338	6.0845e-05	0.0022789	-//-
Niben101Scf03644g01007	37.2505	0.350377	6.7322	0.0015749	0.027682	sp|Q7XT40|EXB15_ORYSJ Expansin-B15 OS=Oryza sativa subsp. japonica GN=EXPB15 PE=3 SV=2//1.04517e-80
Niben101Scf03648g02002	235.761	446.687	-0.92194	0.0011596	0.022151	-//-
Niben101Scf03651g05005	121.913	58.9131	1.0492	1.027e-05	0.00053756	-//-
Niben101Scf03662g02001	19.5191	5.9909	1.704	0.0023631	0.037196	-//-
Niben101Scf03671g00015	569.726	806.156	-0.50079	0.0011864	0.0225	sp|P55243|GLGL3_SOLTU Glucose-1-phosphate adenylyltransferase large subunit 3, chloroplastic/amyloplastic OS=Solanum tuberosum GN=AGPS3 PE=2 SV=1//0
Niben101Scf03673g02009	3529.59	2610.89	0.43496	0.0033053	0.047527	-//-
Niben101Scf03676g03012	10.2055	27.0159	-1.4045	0.0024335	0.038104	-//-
Niben101Scf03679g03009	616.706	2453.93	-1.9924	1.654e-13	8.7383e-11	-//-
Niben101Scf03679g04002	130.89	206.768	-0.65966	0.00095691	0.019099	-//-
Niben101Scf03690g00012	303.453	187.886	0.69162	0.00024029	0.0067109	-//-
Niben101Scf03693g03006	92.1595	175.911	-0.93264	0.00038439	0.0095213	-//-
Niben101Scf03693g07011	2.23977	11.5777	-2.3699	0.0028057	0.042309	-//-
Niben101Scf03694g01005	64.191	35.1766	0.86776	0.0030323	0.044779	-//-
Niben101Scf03694g04005	24.1585	9.05279	1.4161	0.0032547	0.047134	-//-
Niben101Scf03702g03012	97.4232	169.903	-0.80237	0.0001053	0.0035608	-//-
Niben101Scf03705g01004	146.067	250.866	-0.78029	0.00031688	0.0082591	-//-
Niben101Scf03706g00004	66.3836	126.232	-0.92718	7.1674e-05	0.0025937	-//-
Niben101Scf03710g11002	23.2419	6.0398	1.9442	0.00023534	0.0066303	-//-
Niben101Scf03710g11042	27.6762	55.9283	-1.0149	0.001437	0.025793	-//-
Niben101Scf03720g00008	23.7663	63.165	-1.4102	4.421e-06	0.0002716	-//-
Niben101Scf03731g00007	143.565	236.836	-0.72219	0.00017783	0.0053562	-//-
Niben101Scf03732g00001	434.737	651.103	-0.58274	0.00044094	0.010522	sp|O80653|SKIP_ARATH SNW/SKI-interacting protein OS=Arabidopsis thaliana GN=SKIP PE=1 SV=1//0
Niben101Scf03733g01009	168.494	261.52	-0.63422	0.00055782	0.012761	-//-
Niben101Scf03733g06007	351.114	200.839	0.8059	6.9209e-06	0.00038899	-//-
Niben101Scf03734g02011	220.793	319.664	-0.53386	0.0025112	0.039022	-//-
Niben101Scf03734g04015	691.869	422.927	0.71009	1.8962e-05	0.0008779	sp|O65743|RL24_CICAR 60S ribosomal protein L24 OS=Cicer arietinum GN=RPL24 PE=2 SV=1//9.75921e-69
Niben101Scf03736g00004	672.959	1516.19	-1.1719	2.0867e-09	3.8093e-07	sp|F4JKH6|TSS_ARATH Protein TSS OS=Arabidopsis thaliana GN=TSS PE=1 SV=1//0
Niben101Scf03736g00008	100.749	54.1041	0.89695	0.00029046	0.0077498	-//-
Niben101Scf03736g02006	76.0064	127.58	-0.74721	0.0012506	0.023358	-//-
Niben101Scf03738g00006	232.983	408.044	-0.8085	5.357e-06	0.00031696	-//-
Niben101Scf03739g02012	90.9109	144.472	-0.66826	0.00162	0.028304	-//-
Niben101Scf03755g00005	174.26	115.108	0.59825	0.0027438	0.041663	-//-
Niben101Scf03758g01004	61.3787	103.124	-0.74858	0.0022022	0.035484	-//-
Niben101Scf03761g00004	88.6864	184.88	-1.0598	5.922e-07	5.2044e-05	sp|Q9ZPX9|KIC_ARATH Calcium-binding protein KIC OS=Arabidopsis thaliana GN=KIC PE=1 SV=2//1.77406e-54
Niben101Scf03764g05013	190.958	278.488	-0.54436	0.0031613	0.04624	-//-
Niben101Scf03766g01009	210.705	123.281	0.77327	0.00012906	0.0041909	-//-
Niben101Scf03766g01021	34.4185	71.1199	-1.0471	0.00011702	0.0038725	-//-
Niben101Scf03766g02001	424.919	183.388	1.2123	1.9441e-07	1.9933e-05	sp|P92942|CLCB_ARATH Chloride channel protein CLC-b OS=Arabidopsis thaliana GN=CLC-B PE=1 SV=1//0
Niben101Scf03766g09001	4782.13	7981.86	-0.73907	0.0032484	0.047096	-//-
Niben101Scf03766g09005	99.9325	53.9256	0.88998	0.00048825	0.011408	-//-
Niben101Scf03768g00006	629.365	434.8	0.53355	0.0032961	0.047503	-//-
Niben101Scf03768g03025	303.756	573.954	-0.91802	3.0794e-08	3.9065e-06	sp|Q9FHG4|LRKS7_ARATH Probable L-type lectin-domain containing receptor kinase S.7 OS=Arabidopsis thaliana GN=LECRKS7 PE=2 SV=1//4.86209e-71
Niben101Scf03776g00015	210.36	354.229	-0.75183	2.409e-05	0.0010819	-//-
Niben101Scf03778g00005	187.708	109.51	0.77743	0.00018963	0.005636	-//-
Niben101Scf03778g01006	1095.52	749.364	0.54787	0.00044167	0.01053	sp|Q9C889|PR1F2_ARATH PRA1 family protein F2 OS=Arabidopsis thaliana GN=PRA1F2 PE=1 SV=1//4.96035e-64
Niben101Scf03779g07007	466.973	285.294	0.71089	5.4004e-05	0.0020773	-//-
Niben101Scf03786g00008	45.0353	87.497	-0.95818	0.00027012	0.0073385	-//-
Niben101Scf03790g00015	3.5671	38.5405	-3.4336	1.3752e-11	4.3186e-09	-//-
Niben101Scf03792g00001	181.321	287.159	-0.6633	0.00037731	0.009397	-//-
Niben101Scf03804g01017	348.252	613.824	-0.81769	5.4474e-07	4.8926e-05	-//-
Niben101Scf03814g00003	332.723	14.8268	4.488	1.2999e-08	1.877e-06	-//-
Niben101Scf03816g02010	2520.84	3498.73	-0.47293	0.0010134	0.019969	sp|Q43364|EFTUB_NICSY Elongation factor TuB, chloroplastic OS=Nicotiana sylvestris GN=TUFB PE=2 SV=1//0
Niben101Scf03817g15014	172.264	268.533	-0.64048	0.00062824	0.013964	-//-
Niben101Scf03819g01013	49.171	88.2769	-0.84423	0.0010974	0.021214	-//-
Niben101Scf03822g00017	58.1598	28.0601	1.0515	0.00069983	0.015102	-//-
Niben101Scf03824g02001	1553.15	950.849	0.70791	3.244e-06	0.00020979	-//-
Niben101Scf03824g02002	154.939	91.5155	0.75962	0.0020762	0.033917	sp|O65059|RS15_PICMA 40S ribosomal protein S15 OS=Picea mariana GN=RPS15 PE=2 SV=1//2.75154e-90
Niben101Scf03827g01009	11.9588	1.12343	3.4121	0.00018748	0.0055794	sp|F1MK05|RN170_BOVIN E3 ubiquitin-protein ligase RNF170 OS=Bos taurus GN=RNF170 PE=3 SV=2//7.17613e-15
Niben101Scf03839g04019	3288.63	6759.92	-1.0395	1.6695e-12	6.5193e-10	-//-
Niben101Scf03839g08001	60.0852	108.779	-0.85632	0.00032771	0.0084336	-//-
Niben101Scf03839g09002	41.2544	73.086	-0.82505	0.0024385	0.038167	-//-
Niben101Scf03839g12003	205.902	326.677	-0.6659	0.00016225	0.0049942	sp|Q3EBF7|SLD2_ARATH Delta(8)-fatty-acid desaturase 2 OS=Arabidopsis thaliana GN=SLD2 PE=1 SV=1//0
Niben101Scf03842g01014	354.804	203.936	0.7989	0.00048333	0.011317	-//-
Niben101Scf03842g05002	753.745	84.1829	3.1625	0.000556	0.012733	-//-
Niben101Scf03842g08003	365.798	1025.74	-1.4875	4.3057e-06	0.00026671	-//-
Niben101Scf03844g01002	346.912	196.944	0.81678	5.0927e-06	0.00030401	sp|Q7Y0B9|SAPK8_ORYSJ Serine/threonine-protein kinase SAPK8 OS=Oryza sativa subsp. japonica GN=SAPK8 PE=2 SV=1//1.76316e-139
Niben101Scf03848g09003	482.092	304.856	0.66118	0.00013525	0.0043383	-//-
Niben101Scf03850g02024	86.5042	50.2044	0.78496	0.0034406	0.048799	-//-
Niben101Scf03850g03025	88.9068	24.2315	1.8754	0.0016447	0.028661	sp|P37707|B2_DAUCA B2 protein OS=Daucus carota PE=2 SV=1//1.49215e-83
Niben101Scf03852g00025	89.2637	172.339	-0.9491	1.0833e-05	0.00056241	-//-
Niben101Scf03855g04005	232.795	359.401	-0.62653	0.00064693	0.014234	sp|Q8VYW2|BAM9_ARATH Inactive beta-amylase 9 OS=Arabidopsis thaliana GN=BAM9 PE=2 SV=1//6.90166e-157
Niben101Scf03857g01008	71.8494	154.11	-1.1009	7.0265e-07	6.0682e-05	-//-
Niben101Scf03857g04002	119.522	517.14	-2.1133	0.00031685	0.0082591	sp|Q9LZJ5|AB14C_ARATH ABC transporter C family member 14 OS=Arabidopsis thaliana GN=ABCC14 PE=1 SV=1//6.3256e-09
Niben101Scf03865g05006	5.53856	77.2143	-3.8013	7.5171e-19	9.3772e-16	-//-
Niben101Scf03870g00002	193.544	291.061	-0.58866	0.0017546	0.030005	-//-
Niben101Scf03882g04001	0.30007	16.786	-5.8058	1.0733e-08	1.5879e-06	-//-
Niben101Scf03882g06002	49.0996	13.5162	1.861	9.3016e-05	0.0032132	-//-
Niben101Scf03885g05013	333.301	201.511	0.72597	6.6006e-05	0.0024316	-//-
Niben101Scf03888g00002	752.019	1227.66	-0.70707	6.7808e-06	0.00038304	sp|O23264|SEBP1_ARATH Selenium-binding protein 1 OS=Arabidopsis thaliana GN=SBP1 PE=1 SV=1//0
Niben101Scf03891g01004	42.1934	10.4915	2.0078	0.0011349	0.021753	sp|P49865|NTPR_ENTHA Protein NtpR OS=Enterococcus hirae (strain ATCC 9790 / DSM 20160 / JCM 8729 / LMG 6399 / NBRC 3181 / NCIMB 6459 / NCDO 1258) GN=ntpR PE=3 SV=2//3.7759e-20
Niben101Scf03895g01008	113.882	66.6181	0.77356	0.0012217	0.022966	sp|Q147G5|CCA22_ARATH Cyclin-A2-2 OS=Arabidopsis thaliana GN=CYCA2-2 PE=2 SV=1//1.669e-130
Niben101Scf03898g00001	119.211	308.511	-1.3718	3.7906e-05	0.0015589	-//-
Niben101Scf03905g01008	152.611	286.105	-0.90669	1.4192e-06	0.00010757	-//-
Niben101Scf03906g01002	625.595	432.977	0.53094	0.0013312	0.02446	-//-
Niben101Scf03911g00006	530.941	342.648	0.63182	0.0022582	0.036102	-//-
Niben101Scf03913g01042	680.685	1055.25	-0.63252	0.00014615	0.0046125	sp|B9HQZ6|SYAP_POPTR Alanine--tRNA ligase, chloroplastic/mitochondrial OS=Populus trichocarpa GN=POPTRDRAFT_821063 PE=3 SV=1//4.30172e-24
Niben101Scf03914g00001	222.747	320.584	-0.52529	0.003069	0.045247	sp|W5EP13|CA1P_WHEAT 2-carboxy-D-arabinitol-1-phosphatase OS=Triticum aestivum PE=1 SV=1//9.36623e-163
Niben101Scf03917g00014	206.581	312.934	-0.59915	0.0012503	0.023358	sp|Q9NUJ3|T11L1_HUMAN T-complex protein 11-like protein 1 OS=Homo sapiens GN=TCP11L1 PE=1 SV=1//6.06496e-07
Niben101Scf03918g00008	198.443	332.861	-0.7462	3.491e-05	0.0014503	-//-
Niben101Scf03925g01010	29.9191	3.35858	3.1551	0.0027011	0.041202	sp|Q9FIZ3|GSO2_ARATH LRR receptor-like serine/threonine-protein kinase GSO2 OS=Arabidopsis thaliana GN=GSO2 PE=2 SV=2//2.35925e-20
Niben101Scf03925g02005	82.485	147.657	-0.84005	0.00013199	0.0042582	-//-
Niben101Scf03926g00001	1292.26	671.297	0.94487	9.412e-10	1.93e-07	sp|Q93VH2|BBD2_ARATH Bifunctional nuclease 2 OS=Arabidopsis thaliana GN=BBD2 PE=2 SV=1//9.27764e-132
Niben101Scf03934g00015	28.8613	11.4208	1.3375	0.0020643	0.033772	-//-
Niben101Scf03934g00018	691.917	400.007	0.79057	2.1506e-06	0.00015067	-//-
Niben101Scf03937g00009	233.98	103.607	1.1753	3.7955e-07	3.596e-05	-//-
Niben101Scf03937g01009	899.432	548.903	0.71246	1.004e-05	0.0005292	-//-
Niben101Scf03941g03002	58.2786	103.696	-0.83132	0.0007317	0.015603	-//-
Niben101Scf03944g02013	768.764	461.24	0.73702	7.3158e-06	0.00040762	-//-
Niben101Scf03945g00002	84.7937	47.8612	0.8251	0.0018977	0.031704	-//-
Niben101Scf03949g00023	19.6091	5.63573	1.7988	0.0011751	0.022354	sp|P29059|CHI3_TOBAC Endochitinase 3 OS=Nicotiana tabacum GN=CHN14 PE=3 SV=1//2.90317e-82
Niben101Scf03949g07018	153.978	82.2834	0.90405	4.566e-05	0.0018018	-//-
Niben101Scf03951g02008	68.7698	23.0619	1.5763	3.6661e-07	3.4955e-05	-//-
Niben101Scf03952g00003	97.3258	244.208	-1.3272	7.403e-11	1.9907e-08	-//-
Niben101Scf03952g07001	893.312	1429.79	-0.67857	1.0857e-05	0.00056302	sp|F4JKH6|TSS_ARATH Protein TSS OS=Arabidopsis thaliana GN=TSS PE=1 SV=1//0
Niben101Scf03953g01007	2276.37	764.867	1.5735	4.2172e-13	1.8939e-10	-//-
Niben101Scf03953g06003	142.707	251.352	-0.81665	1.1999e-05	0.00060819	-//-
Niben101Scf03961g00004	1134.53	2385	-1.0719	0.00099885	0.019803	-//-
Niben101Scf03964g00004	4.82774	16.9237	-1.8096	0.0029611	0.043944	-//-
Niben101Scf03975g01004	41.2308	3.40058	3.5999	0.0019856	0.032759	-//-
Niben101Scf03977g01005	879.453	524.874	0.74464	4.6945e-06	0.00028413	sp|P34091|RL6_MESCR 60S ribosomal protein L6 OS=Mesembryanthemum crystallinum GN=RPL6 PE=2 SV=1//3.15324e-96
Niben101Scf03979g05004	207.882	304.03	-0.54845	0.0021014	0.034241	sp|O64624|PP163_ARATH Pentatricopeptide repeat-containing protein At2g18940, chloroplastic OS=Arabidopsis thaliana GN=At2g18940 PE=2 SV=1//0
Niben101Scf03985g02025	173.101	298.518	-0.7862	2.1648e-05	0.00098699	-//-
Niben101Scf03985g04026	6.05979	18.4704	-1.6079	0.0035566	0.049991	-//-
Niben101Scf03993g03011	237.569	158.722	0.58185	0.0025131	0.039037	-//-
Niben101Scf03998g00013	115.312	177.75	-0.62431	0.0021892	0.035313	-//-
Niben101Scf04000g01027	40.8323	72.726	-0.83276	0.0033049	0.047527	-//-
Niben101Scf04000g01030	1.48398	9.69985	-2.7085	0.0023399	0.03696	-//-
Niben101Scf04007g05005	96.7649	185.66	-0.94011	4.5912e-06	0.0002797	sp|O65351|SBT17_ARATH Subtilisin-like protease SBT1.7 OS=Arabidopsis thaliana GN=SBT1.7 PE=1 SV=1//1.20405e-27
Niben101Scf04019g05010	24.225	49.3701	-1.0271	0.001765	0.030126	-//-
Niben101Scf04020g00002	235.328	550.869	-1.227	2.7483e-13	1.3513e-10	-//-
Niben101Scf04020g03008	166.34	94.4832	0.81601	0.0001374	0.0043792	-//-
Niben101Scf04020g06011	26.5057	10.4054	1.349	0.0032055	0.046723	sp|O94387|YGSA_SCHPO Uncharacterized ATP-dependent helicase C29A10.10c OS=Schizosaccharomyces pombe (strain 972 / ATCC 24843) GN=SPBC29A10.10c PE=3 SV=1//4.8459e-47
Niben101Scf04024g00009	336.023	229.811	0.54811	0.0018169	0.030755	-//-
Niben101Scf04024g01004	130.605	78.2543	0.73897	0.00084196	0.017408	-//-
Niben101Scf04028g01002	85.8881	42.4409	1.017	0.0001188	0.003921	sp|O82199|C3H20_ARATH Zinc finger CCCH domain-containing protein 20 OS=Arabidopsis thaliana GN=At2g19810 PE=2 SV=1//3.55062e-110
Niben101Scf04028g02002	304.719	197.433	0.62611	0.002582	0.039775	sp|P46290|RL31_NICGU 60S ribosomal protein L31 OS=Nicotiana glutinosa GN=RPL31 PE=2 SV=1//3.33025e-61
Niben101Scf04036g04007	17.5907	2.26545	2.9569	0.001563	0.027515	-//-
Niben101Scf04040g08009	15.7626	0.742749	4.4075	0.0019248	0.032015	-//-
Niben101Scf04040g09014	69.1673	27.9527	1.3071	0.00013877	0.0044136	sp|Q9C7A2|Y3236_ARATH Ankyrin repeat-containing protein At3g12360 OS=Arabidopsis thaliana GN=At3g12360 PE=2 SV=1//7.32226e-20
Niben101Scf04044g22007	13.9068	41.705	-1.5844	2.0885e-05	0.00096	-//-
Niben101Scf04046g00002	40.0521	5.97441	2.745	0.0015435	0.027258	-//-
Niben101Scf04046g00008	36.6385	10.391	1.818	1.6226e-05	0.00077189	-//-
Niben101Scf04046g01006	33.3756	12.3295	1.4367	0.0005758	0.013073	sp|Q9XFR9|G2OX2_ARATH Gibberellin 2-beta-dioxygenase 2 OS=Arabidopsis thaliana GN=GA2OX2 PE=2 SV=1//3.29324e-08
Niben101Scf04053g01007	145.867	252.548	-0.7919	3.3556e-05	0.0014123	-//-
Niben101Scf04073g00006	225.525	509.199	-1.1749	9.2227e-10	1.8999e-07	sp|Q9ZVN2|Y1457_ARATH Acyltransferase-like protein At1g54570, chloroplastic OS=Arabidopsis thaliana GN=At1g54570 PE=2 SV=1//1.26535e-141
Niben101Scf04077g07004	377.061	254.479	0.56725	0.0012514	0.023358	-//-
Niben101Scf04081g02005	861.99	608.455	0.50252	0.0021187	0.034437	-//-
Niben101Scf04083g01003	316.978	473.642	-0.57941	0.00074869	0.015912	-//-
Niben101Scf04084g00005	1475.4	3307.6	-1.1647	6.8173e-05	0.0024931	-//-
Niben101Scf04090g02003	79.9192	226.802	-1.5048	4.8516e-10	1.068e-07	-//-
Niben101Scf04093g00020	216.511	98.3626	1.1383	1.8658e-08	2.5556e-06	-//-
Niben101Scf04096g04008	221.106	146.422	0.59461	0.0028596	0.042856	-//-
Niben101Scf04096g05004	12.5743	1.49241	3.0748	0.00029018	0.0077498	-//-
Niben101Scf04096g07008	39.9351	102.94	-1.3661	1.6357e-07	1.7083e-05	sp|Q9LYN8|EMS1_ARATH Leucine-rich repeat receptor protein kinase EMS1 OS=Arabidopsis thaliana GN=EMS1 PE=1 SV=1//0
Niben101Scf04096g11021	737.063	1240.42	-0.75096	9.8845e-07	7.9981e-05	-//-
Niben101Scf04099g00004	409.408	249.646	0.71365	5.2827e-05	0.0020381	-//-
Niben101Scf04099g08003	131.58	68.3514	0.94489	0.0022771	0.036276	-//-
Niben101Scf04103g03014	135.126	453.101	-1.7455	2.7776e-11	8.2607e-09	-//-
Niben101Scf04103g09001	402.868	617.38	-0.61585	0.00015152	0.0047484	-//-
Niben101Scf04109g01009	148.008	311.231	-1.0723	3.254e-05	0.0013799	-//-
Niben101Scf04109g06004	49.8285	25.2151	0.98268	0.002515	0.039054	sp|Q9ZT50|RHA2A_ARATH E3 ubiquitin-protein ligase RHA2A OS=Arabidopsis thaliana GN=RHA2A PE=1 SV=1//1.38737e-43
Niben101Scf04109g07002	21.7682	6.27589	1.7943	0.0011954	0.022623	-//-
Niben101Scf04113g03011	192.254	297.489	-0.62982	0.00066069	0.014417	-//-
Niben101Scf04113g07011	525.217	288.122	0.86623	7.8521e-05	0.0027897	-//-
Niben101Scf04119g03004	35.7158	5.62404	2.6669	3.85e-08	4.7368e-06	sp|Q93VV5|PTR16_ARATH Protein NRT1/ PTR FAMILY 4.3 OS=Arabidopsis thaliana GN=NPF4.3 PE=2 SV=1//0
Niben101Scf04122g06011	435.581	707.226	-0.69923	1.3883e-05	0.00068137	-//-
Niben101Scf04123g01012	251.095	358.92	-0.51543	0.002584	0.039775	-//-
Niben101Scf04126g05024	1352.26	2390.46	-0.82191	2.6267e-08	3.4391e-06	sp|O80402|DCAM_NICSY S-adenosylmethionine decarboxylase proenzyme OS=Nicotiana sylvestris GN=SAMDC1 PE=2 SV=1//0
Niben101Scf04133g00001	326.326	482.402	-0.56392	0.00069887	0.015096	-//-
Niben101Scf04134g01007	294.437	423.699	-0.52508	0.0027286	0.041524	-//-
Niben101Scf04138g00005	73.6447	40.3779	0.86701	0.0014617	0.026141	-//-
Niben101Scf04140g00003	340.668	136.742	1.3169	2.0447e-09	3.7621e-07	-//-
Niben101Scf04172g01004	135.486	248.003	-0.87222	4.5426e-06	0.00027717	-//-
Niben101Scf04172g02006	8844.15	14861.4	-0.74878	0.0014728	0.026289	-//-
Niben101Scf04173g03010	97.6607	58.6968	0.7345	0.0028117	0.042357	-//-
Niben101Scf04174g05001	5319.96	8348.86	-0.65016	6.1833e-06	0.00035645	-//-
Niben101Scf04177g00006	72.8574	38.675	0.91368	0.0011192	0.021525	sp|Q9SMB8|THT11_TOBAC Tyramine N-feruloyltransferase 4/11 OS=Nicotiana tabacum GN=THT4 PE=2 SV=1//5.68406e-121
Niben101Scf04181g00025	366.135	208.636	0.81138	8.6333e-06	0.00046923	sp|Q9LYK9|RS263_ARATH 40S ribosomal protein S26-3 OS=Arabidopsis thaliana GN=RPS26C PE=2 SV=1//2.27236e-31
Niben101Scf04181g00026	242.494	99.2667	1.2886	3.4716e-05	0.0014462	sp|Q8LDF9|HMGB7_ARATH High mobility group B protein 7 OS=Arabidopsis thaliana GN=HMGB7 PE=1 SV=1//2.62946e-40
Niben101Scf04182g02003	292.374	81.8394	1.8369	6.7734e-06	0.00038304	sp|O48818|EXPA4_ARATH Expansin-A4 OS=Arabidopsis thaliana GN=EXPA4 PE=1 SV=1//1.46173e-144
Niben101Scf04184g06003	67.2245	109.195	-0.69985	0.0029404	0.043722	-//-
Niben101Scf04187g01002	82.8552	157.252	-0.92441	1.5218e-05	0.00073404	sp|Q9LZD8|U89A2_ARATH UDP-glycosyltransferase 89A2 OS=Arabidopsis thaliana GN=UGT89A2 PE=2 SV=1//8.46002e-156
Niben101Scf04187g01012	35.8079	10.8839	1.7181	4.2948e-05	0.0017175	-//-
Niben101Scf04191g04030	37.3092	73.9919	-0.98784	0.00058495	0.013252	-//-
Niben101Scf04198g01001	840.819	1940.05	-1.2062	3.7598e-13	1.7773e-10	sp|Q9ZNZ7|GLTB1_ARATH Ferredoxin-dependent glutamate synthase 1, chloroplastic/mitochondrial OS=Arabidopsis thaliana GN=GLU1 PE=1 SV=3//0
Niben101Scf04198g01002	1571.97	3301.16	-1.0704	6.3809e-13	2.7553e-10	sp|Q43155|GLTB_SPIOL Ferredoxin-dependent glutamate synthase, chloroplastic OS=Spinacia oleracea GN=FdGOGAT PE=1 SV=3//0
Niben101Scf04212g00014	214.36	131.01	0.71036	0.00035518	0.0089508	-//-
Niben101Scf04216g07018	419.267	263.984	0.66742	0.00038092	0.009451	sp|Q9MAP5|SBT33_ARATH Subtilisin-like protease SBT3.3 OS=Arabidopsis thaliana GN=SBT3.3 PE=2 SV=1//8.36223e-12
Niben101Scf04217g02009	23.4496	55.7465	-1.2493	0.00011332	0.0037752	-//-
Niben101Scf04219g01028	92.7275	148.809	-0.68239	0.0013989	0.02532	-//-
Niben101Scf04220g07001	51.7292	89.6392	-0.79315	0.0017469	0.029931	-//-
Niben101Scf04220g07005	56.1452	110.244	-0.97346	6.7605e-05	0.0024824	-//-
Niben101Scf04223g00001	310.604	106.902	1.5388	3.2619e-15	2.4828e-12	-//-
Niben101Scf04223g01022	523.297	731.287	-0.48281	0.0026793	0.040941	-//-
Niben101Scf04225g02007	1250.25	2080.7	-0.73486	7.4273e-07	6.3292e-05	sp|Q9SHI1|IF2C_ARATH Translation initiation factor IF-2, chloroplastic OS=Arabidopsis thaliana GN=At1g17220 PE=2 SV=2//3.37437e-08
Niben101Scf04231g01025	126.6	196.512	-0.63434	0.0015427	0.027254	-//-
Niben101Scf04231g02012	463.634	892.353	-0.94463	5.5445e-07	4.9403e-05	sp|P80595|APY_SOLTU Apyrase OS=Solanum tuberosum GN=RROP1 PE=1 SV=2//4.89842e-12
Niben101Scf04231g02014	6090.07	2867.23	1.0868	1.4555e-13	7.971e-11	-//-
Niben101Scf04233g00010	413.456	699.558	-0.75871	1.4023e-05	0.00068676	-//-
Niben101Scf04234g01014	96.5692	53.5713	0.8501	0.00059279	0.013391	sp|Q8LGU6|CD27B_ARATH Cell division cycle protein 27 homolog B OS=Arabidopsis thaliana GN=CDC27B PE=1 SV=1//1.13311e-14
Niben101Scf04235g00010	188.011	276.919	-0.55864	0.0029764	0.044128	-//-
Niben101Scf04240g02010	6.87911	21.5998	-1.6507	0.0015277	0.027085	-//-
Niben101Scf04252g00009	43.1173	11.9185	1.8551	9.2983e-05	0.0032132	-//-
Niben101Scf04253g03010	213.963	440.201	-1.0408	2.7526e-09	4.9053e-07	-//-
Niben101Scf04260g00011	54.2494	25.1263	1.1104	0.0004536	0.010739	-//-
Niben101Scf04276g00003	126.216	201.391	-0.6741	0.00053916	0.012398	-//-
Niben101Scf04276g04022	954.061	460.795	1.05	4.2796e-11	1.248e-08	-//-
Niben101Scf04286g00001	2.64735	19.4837	-2.8796	1.3448e-05	0.00066803	-//-
Niben101Scf04286g01031	558.272	368.391	0.59973	0.00029444	0.0078194	-//-
Niben101Scf04287g00001	38.9572	17.8647	1.1248	0.0019393	0.032186	-//-
Niben101Scf04287g08001	44.0953	110.553	-1.326	0.00033991	0.0086538	-//-
Niben101Scf04289g01010	178.913	107.501	0.73492	0.003249	0.047096	-//-
Niben101Scf04290g01001	14.7178	34.5736	-1.2321	0.0025472	0.039453	-//-
Niben101Scf04292g00003	9.23569	33.0557	-1.8396	1.8447e-05	0.00085595	sp|C0LGP9|IMK3_ARATH Probable leucine-rich repeat receptor-like protein kinase IMK3 OS=Arabidopsis thaliana GN=IMK3 PE=1 SV=1//0
Niben101Scf04292g05007	132.661	65.8345	1.0108	0.00011043	0.0036899	-//-
Niben101Scf04296g00029	152.858	86.4426	0.82238	0.00017183	0.0052074	-//-
Niben101Scf04300g00008	132.254	75.0415	0.81755	0.00047256	0.011099	-//-
Niben101Scf04301g02007	2546.36	4092.71	-0.68462	2.6993e-06	0.00018066	-//-
Niben101Scf04316g04001	7.85823	0	Inf	0.0002006	0.0058841	-//-
Niben101Scf04318g01016	17930.1	31113.6	-0.79516	0.0014781	0.026362	-//-
Niben101Scf04322g00001	446.807	843.501	-0.91674	6.9157e-05	0.0025249	-//-
Niben101Scf04323g04023	444.446	269.053	0.72412	3.6108e-05	0.0014945	sp|P46301|RS25_SOLLC 40S ribosomal protein S25 OS=Solanum lycopersicum GN=RPS25 PE=3 SV=1//3.98512e-44
Niben101Scf04329g05016	15.2925	2.9779	2.3605	0.00078358	0.016482	-//-
Niben101Scf04331g07008	368.048	754.36	-1.0354	2.4821e-10	5.7457e-08	-//-
Niben101Scf04334g00003	589.998	1098.86	-0.89723	0.00033271	0.0085135	-//-
Niben101Scf04339g06013	11.8021	42.0006	-1.8314	0.0026467	0.040593	-//-
Niben101Scf04362g00010	404.486	261.794	0.62766	0.00044219	0.01053	sp|Q93Z04|PLY13_ARATH Probable pectate lyase 13 OS=Arabidopsis thaliana GN=PMR6 PE=1 SV=1//0
Niben101Scf04367g00012	169.767	257.307	-0.59994	0.0011665	0.022245	-//-
Niben101Scf04371g04008	103.146	43.1033	1.2588	1.1312e-05	0.00058123	-//-
Niben101Scf04375g08024	226.851	151.569	0.58177	0.0028098	0.042343	-//-
Niben101Scf04375g08025	821.497	1362.02	-0.72942	1.1423e-06	9.047e-05	-//-
Niben101Scf04375g09011	505.633	267.84	0.91672	6.3993e-08	7.4644e-06	-//-
Niben101Scf04375g11007	218.522	104.384	1.0659	0.0010042	0.019876	-//-
Niben101Scf04377g00005	1352.62	2178.96	-0.68788	3.5687e-06	0.00022765	sp|P57997|IF2C_PHAVU Translation initiation factor IF-2, chloroplastic OS=Phaseolus vulgaris GN=IF2CP PE=2 SV=1//0
Niben101Scf04387g01030	69.1879	37.0427	0.90133	0.001861	0.031278	-//-
Niben101Scf04387g01036	339.476	209.097	0.69914	0.00014015	0.0044511	sp|Q6UNT2|RL5_CUCSA 60S ribosomal protein L5 OS=Cucumis sativus GN=RPL5 PE=2 SV=1//1.03429e-160
Niben101Scf04388g00011	1824.89	8266.05	-2.1794	9.0271e-38	5.0674e-34	sp|Q9FNB0|CHLH_ARATH Magnesium-chelatase subunit ChlH, chloroplastic OS=Arabidopsis thaliana GN=CHLH PE=1 SV=1//0
Niben101Scf04388g02019	11.7704	0.380676	4.9505	1.7745e-05	0.00083096	-//-
Niben101Scf04395g00022	399.175	217.506	0.87597	2.4541e-06	0.000168	sp|P68428|H32_WHEAT Histone H3.2 OS=Triticum aestivum PE=1 SV=2//1.31296e-78
Niben101Scf04398g06018	109.524	179.558	-0.7132	0.0018149	0.030755	-//-
Niben101Scf04406g07002	158.82	94.1281	0.75469	0.00062643	0.013947	-//-
Niben101Scf04407g01010	101.399	48.907	1.0519	3.2162e-05	0.0013651	sp|Q38806|HSP22_ARATH 22.0 kDa heat shock protein OS=Arabidopsis thaliana GN=HSP22.0 PE=2 SV=1//1.12364e-06
Niben101Scf04407g02024	62.8595	127.524	-1.0206	0.00017419	0.0052677	-//-
Niben101Scf04407g02027	23.3924	54.7613	-1.2271	0.00014288	0.0045251	-//-
Niben101Scf04410g04003	109.914	181.812	-0.72607	0.00032368	0.0083587	-//-
Niben101Scf04410g09008	145.979	220.904	-0.59766	0.0022729	0.036235	-//-
Niben101Scf04411g02006	2679.95	1771.68	0.59709	5.5626e-05	0.0021296	sp|Q39096|ERD15_ARATH Protein EARLY RESPONSIVE TO DEHYDRATION 15 OS=Arabidopsis thaliana GN=ERD15 PE=1 SV=1//4.2025e-30
Niben101Scf04417g00022	78.1173	41.1435	0.92498	0.0034226	0.048655	-//-
Niben101Scf04417g00033	86.642	168.401	-0.95876	4.4475e-05	0.0017675	-//-
Niben101Scf04418g09010	56.9073	94.8303	-0.73673	0.0028902	0.043192	-//-
Niben101Scf04418g12013	2.5716	18.9233	-2.8794	9.2957e-06	0.00049638	-//-
Niben101Scf04432g08005	616.966	405.639	0.605	0.00030709	0.0080836	sp|Q9STY6|RS202_ARATH 40S ribosomal protein S20-2 OS=Arabidopsis thaliana GN=RPS20B PE=2 SV=1//5.26509e-74
Niben101Scf04436g04006	98.9873	37.9268	1.384	2.4108e-06	0.00016605	-//-
Niben101Scf04436g06002	1174.85	671.669	0.80666	2.7435e-07	2.6901e-05	sp|P93847|RL10_SOLME 60S ribosomal protein L10 OS=Solanum melongena GN=RPL10 PE=2 SV=1//3.5689e-154
Niben101Scf04436g11006	50.1499	13.8129	1.8602	4.6865e-07	4.2776e-05	-//-
Niben101Scf04436g13024	548.795	340.152	0.69009	4.5658e-05	0.0018018	sp|Q6UNT2|RL5_CUCSA 60S ribosomal protein L5 OS=Cucumis sativus GN=RPL5 PE=2 SV=1//9.96059e-156
Niben101Scf04436g15042	77.6863	40.7937	0.92931	0.00077738	0.016373	-//-
Niben101Scf04437g04001	8.73791	0.700754	3.6403	0.0013128	0.024198	-//-
Niben101Scf04440g00009	887.57	631.029	0.49215	0.0017275	0.029701	-//-
Niben101Scf04444g05001	308.016	447.342	-0.53837	0.0015228	0.027019	-//-
Niben101Scf04445g04006	465.077	304.242	0.61225	0.00062358	0.013904	-//-
Niben101Scf04445g04012	227.603	373.672	-0.71525	0.0017556	0.030012	-//-
Niben101Scf04446g00023	247.165	534.417	-1.1125	8.0836e-11	2.148e-08	-//-
Niben101Scf04448g02007	768.067	441.372	0.79924	1.0532e-06	8.4158e-05	-//-
Niben101Scf04464g03007	28.1434	3.0502	3.2058	0.00085083	0.017503	-//-
Niben101Scf04473g01003	95.8903	53.5591	0.84025	0.00098016	0.019494	sp|D9UBX6|RTM2B_ARATH Inactive protein RESTRICTED TEV MOVEMENT 2 OS=Arabidopsis thaliana GN=RTM2 PE=3 SV=1//1.15998e-10
Niben101Scf04477g00011	107.211	167.76	-0.64594	0.0015461	0.027271	-//-
Niben101Scf04487g04010	76.9464	12.3343	2.6412	8.8471e-15	6.0198e-12	sp|P51074|ANX4_FRAAN Annexin-like protein RJ4 OS=Fragaria ananassa PE=2 SV=2//8.35355e-137
Niben101Scf04494g00018	2805.67	4371.78	-0.63988	6.4923e-05	0.0024036	-//-
Niben101Scf04496g00009	1066.69	1864.85	-0.80592	8.0103e-08	9.2238e-06	sp|Q6CIY7|SYM1_KLULA Protein SYM1 OS=Kluyveromyces lactis (strain ATCC 8585 / CBS 2359 / DSM 70799 / NBRC 1267 / NRRL Y-1140 / WM37) GN=SYM1 PE=3 SV=1//2.57658e-16
Niben101Scf04504g03008	6257.38	12056.8	-0.94622	5.6064e-05	0.0021428	-//-
Niben101Scf04505g04002	61.7096	101.22	-0.71393	0.003272	0.047253	-//-
Niben101Scf04523g00006	39.9292	85.635	-1.1008	3.8555e-05	0.0015812	-//-
Niben101Scf04528g09004	526.21	831.196	-0.65955	3.9935e-05	0.0016259	-//-
Niben101Scf04528g11009	232.356	85.3714	1.4445	0.00025128	0.0069629	-//-
Niben101Scf04535g02012	247.366	89.6424	1.4644	0.0022623	0.036129	sp|O80763|NRX1_ARATH Probable nucleoredoxin 1 OS=Arabidopsis thaliana GN=At1g60420 PE=1 SV=1//9.1684e-22
Niben101Scf04537g00005	116.118	191.008	-0.71804	0.00041263	0.010069	-//-
Niben101Scf04537g01009	198.334	303.639	-0.61442	0.00096533	0.019233	-//-
Niben101Scf04539g04014	190.752	292.512	-0.6168	0.0007782	0.016376	-//-
Niben101Scf04554g07024	97.7071	160.29	-0.71415	0.00074954	0.015915	-//-
Niben101Scf04558g01013	295.737	175.175	0.75551	5.9157e-05	0.0022306	-//-
Niben101Scf04561g00005	4296.31	8180.83	-0.92915	0.00060445	0.013606	sp|P13869|CB12_PETHY Chlorophyll a-b binding protein, chloroplastic OS=Petunia hybrida PE=2 SV=1//2.64896e-13
Niben101Scf04563g02007	17.8856	68.6922	-1.9413	9.781e-10	1.9875e-07	sp|O65740|DEF2_CAPAN Defensin J1-2 OS=Capsicum annuum PE=1 SV=1//1.9522e-30
Niben101Scf04567g00003	1264.72	921.043	0.45748	0.0027248	0.041494	sp|Q7XTT4|NUCL2_ORYSJ Nucleolin 2 OS=Oryza sativa subsp. japonica GN=Os04g0620700 PE=2 SV=2//6.59355e-65
Niben101Scf04570g06004	28.2294	8.96189	1.6553	0.00038491	0.0095289	-//-
Niben101Scf04574g05014	34.8349	65.3342	-0.9073	0.0023033	0.036575	-//-
Niben101Scf04574g09004	309.788	145.502	1.0902	5.4151e-06	0.00031872	-//-
Niben101Scf04583g00008	1819.65	1327.16	0.45531	0.0030834	0.0454	sp|P49314|ROC2_NICPL 31 kDa ribonucleoprotein, chloroplastic OS=Nicotiana plumbaginifolia PE=2 SV=1//1.10088e-140
Niben101Scf04593g00003	204.094	333.456	-0.70826	0.00047543	0.011155	-//-
Niben101Scf04594g02003	12.8162	0.392372	5.0296	0.00011702	0.0038725	-//-
Niben101Scf04600g00005	119.125	67.6278	0.81679	0.00044971	0.010674	sp|Q39950|NLTP_HELAN Non-specific lipid-transfer protein OS=Helianthus annuus PE=3 SV=1//2.14272e-22
Niben101Scf04607g00001	67.805	38.4278	0.81924	0.0033675	0.048025	-//-
Niben101Scf04607g07006	91.5611	247.004	-1.4317	8.1104e-13	3.4039e-10	-//-
Niben101Scf04614g08001	161.899	95.403	0.76299	0.00035559	0.0089561	-//-
Niben101Scf04624g00012	1165.62	649.8	0.84303	1.2379e-07	1.3461e-05	-//-
Niben101Scf04626g01004	129.666	214.017	-0.72292	0.00019211	0.0056984	-//-
Niben101Scf04627g02010	116.659	69.344	0.75045	0.0015191	0.026986	-//-
Niben101Scf04627g05002	23.3166	1.12343	4.3754	0.00028263	0.0076093	-//-
Niben101Scf04629g02001	4486.7	2679.89	0.74348	3.6986e-07	3.519e-05	sp|Q93VH2|BBD2_ARATH Bifunctional nuclease 2 OS=Arabidopsis thaliana GN=BBD2 PE=2 SV=1//8.58266e-115
Niben101Scf04632g02001	37.5643	9.76045	1.9443	3.5653e-06	0.00022765	-//-
Niben101Scf04639g06007	2043.64	1503.13	0.44317	0.0033859	0.048217	-//-
Niben101Scf04641g03006	1128.1	767.206	0.55621	0.0027131	0.041342	-//-
Niben101Scf04643g01003	5.11461	122.109	-4.5774	0.00075175	0.015954	-//-
Niben101Scf04650g01008	31.2587	65.2385	-1.0615	0.00033926	0.0086515	-//-
Niben101Scf04652g00007	44.2061	81.522	-0.88294	0.00083855	0.017346	-//-
Niben101Scf04653g02007	1385.44	1004.39	0.46402	0.0034768	0.049162	sp|P19683|ROC4_NICSY 31 kDa ribonucleoprotein, chloroplastic OS=Nicotiana sylvestris PE=1 SV=1//1.97766e-175
Niben101Scf04655g04018	305.292	465.847	-0.60967	0.00044848	0.010653	-//-
Niben101Scf04659g00004	3774.47	1506.01	1.3255	4.0746e-08	4.9723e-06	-//-
Niben101Scf04662g00003	324.98	176.396	0.88153	1.7773e-06	0.00012957	-//-
Niben101Scf04663g05020	453.551	904.162	-0.99531	2.0525e-09	3.7621e-07	-//-
Niben101Scf04664g00021	207.409	336.844	-0.6996	0.00038333	0.0095003	-//-
Niben101Scf04674g02003	158.639	101.863	0.63911	0.0023525	0.037095	sp|P83851|IUNH_LEIMA Inosine-uridine preferring nucleoside hydrolase OS=Leishmania major GN=NSNH PE=1 SV=3//8.14341e-07
Niben101Scf04706g01026	406.575	706.055	-0.79626	1.1344e-06	9.0008e-05	sp|Q9FKP4|KCA2_ARATH Kinesin-like protein KCA2 OS=Arabidopsis thaliana GN=KCA2 PE=1 SV=1//0
Niben101Scf04739g00001	72.7107	29.9029	1.2819	0.00057299	0.013022	sp|Q651X6|CSLE6_ORYSJ Cellulose synthase-like protein E6 OS=Oryza sativa subsp. japonica GN=CSLE6 PE=2 SV=1//0
Niben101Scf04739g00023	59.1666	28.8587	1.0358	0.00070352	0.015167	-//-
Niben101Scf04742g02006	73.1205	126.235	-0.78777	0.00058313	0.013219	-//-
Niben101Scf04752g00008	42.299	99.4026	-1.2327	9.3403e-06	0.00049758	-//-
Niben101Scf04753g01003	58.2476	121.078	-1.0557	9.5559e-06	0.00050606	sp|O81416|GUN17_ARATH Endoglucanase 17 OS=Arabidopsis thaliana GN=At4g02290 PE=2 SV=1//0
Niben101Scf04765g00011	786.319	372.637	1.0773	0.00025492	0.0070396	sp|P24805|TSJT1_TOBAC Stem-specific protein TSJT1 OS=Nicotiana tabacum GN=TSJT1 PE=2 SV=1//2.80505e-100
Niben101Scf04765g01002	170.973	371.068	-1.1179	1.2581e-09	2.4634e-07	-//-
Niben101Scf04772g00008	213.463	89.695	1.2509	0.00019767	0.00582	-//-
Niben101Scf04775g00004	174.687	77.7869	1.1672	1.8485e-05	0.00085668	-//-
Niben101Scf04779g01006	776.566	1447.65	-0.89853	4.5889e-09	7.661e-07	sp|I1K0K6|EFGC2_SOYBN Elongation factor G-2, chloroplastic OS=Glycine max GN=fusA2 PE=3 SV=1//0
Niben101Scf04779g01029	99.919	188.802	-0.91805	3.295e-05	0.0013947	-//-
Niben101Scf04784g03004	141.626	12.4348	3.5096	0.00095179	0.019014	-//-
Niben101Scf04784g03005	669.166	439.008	0.60812	0.00023876	0.0066845	sp|P46301|RS25_SOLLC 40S ribosomal protein S25 OS=Solanum lycopersicum GN=RPS25 PE=3 SV=1//1.50156e-41
Niben101Scf04785g01014	83.3436	144.373	-0.79265	0.00027807	0.0075273	-//-
Niben101Scf04785g01021	97.3247	154.577	-0.66745	0.0020967	0.034177	-//-
Niben101Scf04786g01003	182.083	290.849	-0.67567	0.00026373	0.0072173	-//-
Niben101Scf04786g01004	3667.86	5472.86	-0.57736	0.0004251	0.010258	sp|P31853|ATPX_SPIOL ATP synthase subunit b&apos;, chloroplastic OS=Spinacia oleracea GN=ATPG PE=1 SV=2//1.65325e-80
Niben101Scf04792g01004	237.361	114.244	1.055	1.01e-07	1.1227e-05	-//-
Niben101Scf04819g02007	125.371	242.52	-0.9519	9.3463e-07	7.6314e-05	-//-
Niben101Scf04820g02009	266.119	455.504	-0.77539	0.0034209	0.048647	sp|O24381|TLC1_SOLTU Plastidic ATP/ADP-transporter OS=Solanum tuberosum PE=2 SV=2//0
Niben101Scf04820g02010	46.8817	97.7227	-1.0597	0.0017035	0.029435	sp|Q9FMF5|RPT3_ARATH Root phototropism protein 3 OS=Arabidopsis thaliana GN=RPT3 PE=1 SV=2//1.70183e-60
Niben101Scf04831g00010	166.026	250.052	-0.59082	0.0018334	0.030941	-//-
Niben101Scf04840g01004	110.424	187.872	-0.76669	0.00019724	0.005812	-//-
Niben101Scf04845g00010	99.3848	51.2102	0.95659	0.00054247	0.012457	-//-
Niben101Scf04845g00017	46.6896	81.0181	-0.79514	0.0018495	0.031132	-//-
Niben101Scf04847g03018	187.928	346.966	-0.88461	1.1757e-06	9.2632e-05	sp|P36181|HSP80_SOLLC Heat shock cognate protein 80 OS=Solanum lycopersicum GN=HSC80 PE=2 SV=1//3.03488e-65
Niben101Scf04861g01010	249.037	471.736	-0.92162	8.0568e-08	9.2536e-06	-//-
Niben101Scf04861g01011	4400.28	2621.36	0.74728	0.00027535	0.0074717	sp|Q9SCV9|BGAL3_ARATH Beta-galactosidase 3 OS=Arabidopsis thaliana GN=BGAL3 PE=1 SV=1//0
Niben101Scf04869g03002	99.7366	2.30054	5.4381	3.3334e-06	0.00021416	-//-
Niben101Scf04869g05006	859.604	547.548	0.65069	3.0126e-05	0.0012885	-//-
Niben101Scf04871g08010	230.599	922.193	-1.9997	1.8598e-20	2.88e-17	sp|Q66PF2|URT1_FRAAN Putative UDP-rhamnose:rhamnosyltransferase 1 OS=Fragaria ananassa GN=GT4 PE=2 SV=1//1.23524e-113
Niben101Scf04871g08011	293.167	1068.8	-1.8662	6.1367e-12	2.0566e-09	sp|Q66PF2|URT1_FRAAN Putative UDP-rhamnose:rhamnosyltransferase 1 OS=Fragaria ananassa GN=GT4 PE=2 SV=1//2.2664e-98
Niben101Scf04871g08015	8.63773	48.8821	-2.5006	9.521e-11	2.5151e-08	sp|Q66PF2|URT1_FRAAN Putative UDP-rhamnose:rhamnosyltransferase 1 OS=Fragaria ananassa GN=GT4 PE=2 SV=1//6.4029e-99
Niben101Scf04878g00030	115.694	203.955	-0.81794	4.0337e-05	0.0016405	-//-
Niben101Scf04881g00001	53.0238	197.527	-1.8973	3.0249e-06	0.00019751	-//-
Niben101Scf04882g00001	127.627	60.4736	1.0776	5.5458e-06	0.00032513	-//-
Niben101Scf04884g01013	173.184	280.683	-0.69664	0.00017757	0.0053562	-//-
Niben101Scf04899g01016	124.205	203.396	-0.71157	0.00082379	0.017103	-//-
Niben101Scf04902g00008	656.807	457.599	0.52138	0.0010323	0.020289	sp|O23225|PUB5_ARATH U-box domain-containing protein 5 OS=Arabidopsis thaliana GN=PUB5 PE=3 SV=3//9.54936e-16
Niben101Scf04903g01016	465.048	658.008	-0.50073	0.0023074	0.036615	-//-
Niben101Scf04905g03007	233.881	358.791	-0.61737	0.00037995	0.0094426	-//-
Niben101Scf04921g00005	14.2652	41.2377	-1.5315	4.4687e-05	0.0017744	-//-
Niben101Scf04926g04007	221.801	120.199	0.88385	4.1296e-05	0.0016662	sp|Q9LU64|SODF2_ARATH Superoxide dismutase [Fe] 2, chloroplastic OS=Arabidopsis thaliana GN=FSD2 PE=1 SV=1//4.81248e-94
Niben101Scf04926g06004	202.255	338.431	-0.74269	2.835e-05	0.0012254	-//-
Niben101Scf04940g01021	25.5542	8.26805	1.6279	0.0005979	0.013486	-//-
Niben101Scf04943g01010	17.0756	4.5543	1.9066	0.0019914	0.032828	-//-
Niben101Scf04953g07001	17.3827	0.380676	5.5129	0.00013096	0.0042372	-//-
Niben101Scf04953g07003	79.8152	131.461	-0.7199	0.0012678	0.023615	-//-
Niben101Scf04955g07012	46.6424	23.501	0.98892	0.0035211	0.049647	-//-
Niben101Scf04963g04005	704.548	1163.5	-0.7237	3.2993e-06	0.00021227	sp|P0C1U4|GUN9_ORYSJ Endoglucanase 9 OS=Oryza sativa subsp. japonica GN=GLU1 PE=2 SV=1//2.00304e-87
Niben101Scf04964g00002	3766.59	9187.8	-1.2865	5.8983e-09	9.46e-07	-//-
Niben101Scf04967g01005	434.745	630.699	-0.53678	0.00070338	0.015167	sp|J9RYI6|DCVR_CUCSA Divinyl chlorophyllide a 8-vinyl-reductase, chloroplastic OS=Cucumis sativus GN=DVR PE=1 SV=1//0
Niben101Scf04969g01002	307.75	205.592	0.58198	0.0033414	0.047743	-//-
Niben101Scf04991g00004	424.919	284.704	0.57772	0.00085804	0.017619	sp|Q6NQE2|FQRL1_ARATH Probable NAD(P)H dehydrogenase (quinone) FQR1-like 1 OS=Arabidopsis thaliana GN=At4g27270 PE=2 SV=1//1.13293e-117
Niben101Scf04992g00013	24.7462	69.7727	-1.4955	2.8588e-05	0.0012345	-//-
Niben101Scf04993g05013	66.1759	32.7033	1.0169	0.0021312	0.034601	sp|O81263|KITH_ORYSJ Thymidine kinase OS=Oryza sativa subsp. japonica GN=TK PE=2 SV=2//1.84601e-74
Niben101Scf04995g00014	469.26	833.147	-0.82818	1.4558e-07	1.5492e-05	-//-
Niben101Scf04995g13007	103.928	169.486	-0.70558	0.00056343	0.012869	-//-
Niben101Scf05002g03030	2356.79	1432.29	0.7185	2.5133e-06	0.00017086	sp|Q9SIP7|RS31_ARATH 40S ribosomal protein S3-1 OS=Arabidopsis thaliana GN=RPS3A PE=1 SV=1//6.22093e-142
Niben101Scf05017g06019	2633.22	3619.49	-0.45896	0.0013394	0.02453	sp|O20252|S17P_SPIOL Sedoheptulose-1,7-bisphosphatase, chloroplastic OS=Spinacia oleracea PE=2 SV=1//0
Niben101Scf05025g10008	94.9017	162.024	-0.7717	0.00026417	0.0072248	-//-
Niben101Scf05030g01004	361.611	205.55	0.81495	6.2772e-06	0.00036002	sp|P17407|21KD_DAUCA 21 kDa protein OS=Daucus carota PE=2 SV=1//2.87225e-66
Niben101Scf05032g00009	887.593	1538.59	-0.79363	1.8646e-07	1.9294e-05	-//-
Niben101Scf05035g01002	74.3191	167.416	-1.1716	0.0006983	0.015091	sp|Q5N800|NYC1_ORYSJ Probable chlorophyll(ide) b reductase NYC1, chloroplastic OS=Oryza sativa subsp. japonica GN=NYC1 PE=1 SV=1//0
Niben101Scf05035g02005	20.8863	42.938	-1.0397	0.0021575	0.034919	-//-
Niben101Scf05044g00002	28.163	55.3631	-0.97513	0.0012131	0.022871	-//-
Niben101Scf05051g03020	432.322	295.985	0.54658	0.0018285	0.030882	-//-
Niben101Scf05060g04009	147.813	284.147	-0.94286	0.0010706	0.020806	-//-
Niben101Scf05060g07004	387.094	637.936	-0.72073	0.0002344	0.0066186	-//-
Niben101Scf05062g02001	671.052	986.917	-0.5565	0.00032205	0.0083406	-//-
Niben101Scf05071g00010	194.504	303.048	-0.63975	0.00052418	0.012109	-//-
Niben101Scf05078g04001	202.72	301.263	-0.57153	0.0019028	0.031755	-//-
Niben101Scf05078g05001	1149.89	829.079	0.47191	0.0030164	0.044588	sp|Q9ASS6|PNSL5_ARATH Photosynthetic NDH subunit of lumenal location 5, chloroplastic OS=Arabidopsis thaliana GN=PNSL5 PE=1 SV=1//1.10889e-98
Niben101Scf05095g01004	273.594	174.189	0.65138	0.00067009	0.014573	-//-
Niben101Scf05100g01012	232.864	144.646	0.68695	0.0032092	0.046756	-//-
Niben101Scf05107g00009	723.732	999.942	-0.46639	0.0024392	0.038167	-//-
Niben101Scf05112g00012	29.5179	11.4586	1.3652	0.0026759	0.040922	-//-
Niben101Scf05122g00005	187.068	337.297	-0.85046	4.9448e-06	0.00029608	sp|Q9SPV4|SAMT_CLABR Salicylate carboxymethyltransferase OS=Clarkia breweri GN=SAMT PE=1 SV=1//1.09845e-12
Niben101Scf05123g01005	86.6237	143.04	-0.72358	0.00087907	0.017904	-//-
Niben101Scf05135g06001	95.4048	57.4021	0.73296	0.0031814	0.046478	-//-
Niben101Scf05151g01011	40.8324	75.1435	-0.87993	0.0011666	0.022245	-//-
Niben101Scf05152g01001	195.405	326.886	-0.74233	2.5898e-05	0.0011414	sp|Q9LSE7|B561C_ARATH Cytochrome b561 and DOMON domain-containing protein At3g25290 OS=Arabidopsis thaliana GN=At3g25290 PE=2 SV=1//1.82159e-41
Niben101Scf05154g01009	949.463	1323.22	-0.47887	0.0015513	0.027347	sp|Q9SF32|IQD1_ARATH Protein IQ-DOMAIN 1 OS=Arabidopsis thaliana GN=IQD1 PE=1 SV=1//1.65664e-17
Niben101Scf05177g00008	75.0111	17.9652	2.0619	3.0854e-10	7.0334e-08	-//-
Niben101Scf05183g04013	27.7231	3.0316	3.1929	0.00055663	0.012741	-//-
Niben101Scf05188g03028	406.465	685.875	-0.75481	0.00015027	0.0047256	-//-
Niben101Scf05201g00003	146.49	87.3257	0.74632	0.00066003	0.014417	-//-
Niben101Scf05201g08006	19.2242	41.3477	-1.1049	0.0015955	0.027956	-//-
Niben101Scf05202g00005	62.452	106.406	-0.76876	0.0015295	0.027095	-//-
Niben101Scf05203g05001	47.2068	15.2936	1.6261	0.0029393	0.043722	-//-
Niben101Scf05211g00001	52.5773	7.6465	2.7816	7.8261e-12	2.5842e-09	sp|Q9LZX5|ZPR2_ARATH Protein LITTLE ZIPPER 2 OS=Arabidopsis thaliana GN=ZPR2 PE=1 SV=1//5.16417e-09
Niben101Scf05212g01005	207.031	297.675	-0.52389	0.0035185	0.049626	-//-
Niben101Scf05216g04001	3914.63	2518.78	0.63615	1.2773e-05	0.00063874	-//-
Niben101Scf05220g00005	1906.15	2591.33	-0.44303	0.0027698	0.04191	sp|P21616|AVP_VIGRR Pyrophosphate-energized vacuolar membrane proton pump OS=Vigna radiata var. radiata PE=1 SV=4//0
Niben101Scf05222g04012	691.117	966.152	-0.48332	0.0017475	0.029931	-//-
Niben101Scf05226g00010	4.5912	19.019	-2.0505	0.00043861	0.010477	-//-
Niben101Scf05226g08017	130.992	209.378	-0.67663	0.00060597	0.013627	-//-
Niben101Scf05229g00003	42.9865	6.26898	2.7776	0.0022348	0.035834	-//-
Niben101Scf05229g03006	9.75395	0.784745	3.6357	0.00062842	0.013964	-//-
Niben101Scf05231g02021	161.087	238.815	-0.56806	0.0029692	0.044036	-//-
Niben101Scf05238g01012	8668.37	13219.8	-0.60887	0.0024536	0.038338	-//-
Niben101Scf05245g01008	137.655	225.138	-0.70975	0.00023963	0.0067015	-//-
Niben101Scf05245g02003	43.1811	12.6007	1.7769	0.00022322	0.0063728	-//-
Niben101Scf05250g02011	2584.15	5424.61	-1.0698	3.1639e-13	1.5116e-10	sp|P93338|GAPN_NICPL NADP-dependent glyceraldehyde-3-phosphate dehydrogenase OS=Nicotiana plumbaginifolia GN=GAPN PE=2 SV=1//0
Niben101Scf05250g02013	146.703	370.531	-1.3367	1.1695e-11	3.725e-09	-//-
Niben101Scf05251g01011	1.25965	69.1799	-5.7793	0.0030846	0.045403	-//-
Niben101Scf05262g00019	141.466	78.449	0.85063	0.00013731	0.0043792	-//-
Niben101Scf05269g04001	180.643	386.909	-1.0989	1.1849e-09	2.344e-07	-//-
Niben101Scf05270g01002	7932.98	3557.21	1.1571	8.6125e-15	5.9556e-12	-//-
Niben101Scf05278g01015	3454.42	5299.81	-0.61749	0.00076952	0.016255	sp|Q8SKU2|TIC62_PEA Protein TIC 62, chloroplastic OS=Pisum sativum GN=TIC62 PE=1 SV=2//8.2863e-12
Niben101Scf05278g05007	141.896	262.148	-0.88555	2.5155e-06	0.00017086	-//-
Niben101Scf05279g01002	6536.62	2881.65	1.1817	0.00022132	0.0063315	-//-
Niben101Scf05279g05006	129.73	4.45171	4.865	0.0035577	0.049991	-//-
Niben101Scf05298g05002	687.406	438.516	0.64853	8.588e-05	0.0030037	-//-
Niben101Scf05298g06002	534.391	361.682	0.56318	0.00094502	0.018927	sp|P42791|RL182_ARATH 60S ribosomal protein L18-2 OS=Arabidopsis thaliana GN=RPL18B PE=1 SV=2//1.37159e-108
Niben101Scf05301g03002	83.0025	140.454	-0.75887	0.00060658	0.013627	-//-
Niben101Scf05301g05001	81.7162	34.0181	1.2643	7.2746e-05	0.002624	-//-
Niben101Scf05302g04012	237.219	374.812	-0.65994	0.00016109	0.004972	-//-
Niben101Scf05304g02001	777.634	1099.52	-0.49971	0.001345	0.024583	-//-
Niben101Scf05304g05008	3856.45	5463.3	-0.5025	0.00060108	0.013551	sp|Q9SMB4|PSBS_TOBAC Photosystem II 22 kDa protein, chloroplastic OS=Nicotiana tabacum GN=PSBS PE=2 SV=1//1.05191e-118
Niben101Scf05304g06010	52.6614	21.5833	1.2868	0.00014972	0.004715	-//-
Niben101Scf05304g10018	145.924	89.9416	0.69816	0.0010411	0.020417	-//-
Niben101Scf05306g03010	258.059	154.508	0.74002	0.00010691	0.0036072	-//-
Niben101Scf05311g01008	699.437	1102.69	-0.65676	2.4697e-05	0.0011001	sp|Q9SID1|BBX25_ARATH B-box zinc finger protein 25 OS=Arabidopsis thaliana GN=BBX25 PE=1 SV=2//1.03275e-54
Niben101Scf05319g05007	941.545	1546.54	-0.71594	0.0016204	0.028304	-//-
Niben101Scf05321g06001	369.473	578.852	-0.64773	9.473e-05	0.0032624	-//-
Niben101Scf05323g02008	122.717	190.62	-0.63536	0.0012981	0.023999	-//-
Niben101Scf05326g00012	16.0002	1.11173	3.8472	5.181e-06	0.00030817	-//-
Niben101Scf05330g03004	10.3499	28.1138	-1.4417	0.0013725	0.024943	-//-
Niben101Scf05336g00012	44.8173	85.156	-0.92605	0.00048548	0.011361	-//-
Niben101Scf05343g03003	155.304	283.051	-0.86597	3.2399e-06	0.00020979	-//-
Niben101Scf05348g00002	248.961	134.153	0.89204	4.865e-06	0.00029169	-//-
Niben101Scf05348g01023	93.7525	172.882	-0.88285	3.0514e-05	0.0013038	-//-
Niben101Scf05348g01026	63.05	159.318	-1.3373	3.1456e-07	3.0249e-05	sp|C0LGE4|Y1124_ARATH Probable LRR receptor-like serine/threonine-protein kinase At1g12460 OS=Arabidopsis thaliana GN=At1g12460 PE=2 SV=1//0
Niben101Scf05368g00004	118.273	72.5043	0.70598	0.0024893	0.038762	-//-
Niben101Scf05368g03015	12230.4	16207	-0.40615	0.0035235	0.049665	-//-
Niben101Scf05371g00004	65.9546	125.511	-0.92827	0.0031119	0.045672	sp|O23090|BH014_ARATH Transcription factor bHLH14 OS=Arabidopsis thaliana GN=BHLH14 PE=2 SV=1//2.10059e-66
Niben101Scf05372g05017	228.16	390.662	-0.77588	1.1168e-05	0.00057516	sp|Q42601|CARB_ARATH Carbamoyl-phosphate synthase large chain, chloroplastic OS=Arabidopsis thaliana GN=CARB PE=1 SV=1//6.7169e-56
Niben101Scf05373g02004	672.03	397.718	0.75678	0.00029403	0.0078179	sp|P0CG89|H4_SOYBN Histone H4 OS=Glycine max PE=3 SV=1//1.01166e-47
Niben101Scf05374g01018	216.468	390.311	-0.85047	1.3442e-06	0.00010319	-//-
Niben101Scf05375g01004	111.869	198.909	-0.8303	3.3832e-05	0.0014226	-//-
Niben101Scf05391g02002	163.203	252.926	-0.63204	0.0009926	0.01969	-//-
Niben101Scf05391g02005	361.905	200.195	0.8542	3.155e-06	0.00020475	sp|P68428|H32_WHEAT Histone H3.2 OS=Triticum aestivum PE=1 SV=2//2.19513e-48
[truncated: 1,197 more rows]
